# Supplementary material for: Whole genome re-sequencing reveals artificial and natural selection for milk traits in East Friesian sheep
Source: Front Vet Sci. 2022 Oct 18;9:1034211. doi: 10.3389/fvets.2022.1034211 (PMC9623881; doi:10.3389/fvets.2022.1034211)
Supplement: Supplementary file 1 [file Data_Sheet_1.xlsx]

## Sheet: Table S1
Table S1.Sample Description
Sample Name	Distribution	Breed origin	Sampling locations (contributors)	Longitude	Latitude
EFS1	East Friesian dairy sheep	Germany	Beijing, China	116.25	39.54
EFS2
EFS3
EFS4
EFS5
EFS6
EFS7
EFS8
EFS9
EFS10

## Sheet: Table S2
Table S2.Resequencing data from our 10 East Friesian dairy sheep
Sample	Raw Reads Number	Raw Bases Number	Clean Reads Number	Clean Reads Rate(%)	Clean Bases Number	Low-quality Reads Number	Low-quality Reads Rate(%)	Ns Reads Number	Ns Reads Rate(%)	Adapter Polluted Reads Number	Adapter Polluted Reads Rate(%)	Raw Q30 Bases Rate(%)	Clean Q30 Bases Rate(%)	Sequencing data volume (G Bases)	Average Depth
EFS1	203298080	30494712000	199290496	98.03	29893574400	641106	0.32	270	0	3366208	1.66	92.48	92.62	30.4947	11.29
EFS2	225333348	33800002200	219231118	97.29	32884667700	669606	0.3	264	0	5432360	2.41	92.92	93.05	33.8	12.52
EFS3	220062090	33009313500	213763206	97.14	32064480900	761592	0.35	290	0	5537002	2.52	92.53	92.7	33.0093	12.23
EFS4	184287038	27643055700	180719156	98.06	27107873400	627588	0.34	238	0	2940056	1.59	92.55	92.7	27.6431	10.24
EFS5	151678292	22751743800	144850188	95.5	21727528200	515352	0.34	182	0	6312570	4.16	92.54	92.7	22.7517	8.43
EFS6	198929572	29839435800	195915076	98.48	29387261400	674242	0.34	246	0	2340008	1.18	92.34	92.5	29.8394	11.05
EFS7	176368550	26455282500	169093576	95.88	25364036400	611850	0.35	208	0	6662916	3.78	92.5	92.64	26.4553	9.8
EFS8	173723954	26058593100	167405574	96.36	25110836100	598792	0.34	216	0	5719372	3.29	92.4	92.55	26.0586	9.65
EFS9	183469800	27520470000	177587610	96.79	26638141500	661492	0.36	254	0	5220444	2.84	92.46	92.61	27.5205	10.19
EFS10	189222964	28383444600	183739602	97.1	27560940300	690576	0.36	224	0	4792562	2.53	92.47	92.63	28.3834	10.51

## Sheet: Sheet S3
Table S3.Resequencing data from NCBI
Project	Sample	Sra	Spp	Strain	Group	Age	Sex
PRJEB3139	SAMEA1964491	ERR340346	Ovis orientalis	Asiatic Mouflon	wild		male
PRJEB3139	SAMEA1972234	ERR332573	Ovis orientalis	Asiatic Mouflon	wild		male
PRJEB3139	SAMEA2012637	ERR157938	Ovis orientalis	Asiatic Mouflon	wild	60 months	male
PRJEB3139	SAMEA2012642	ERR157932	Ovis orientalis	Asiatic Mouflon	wild	24 months	male
PRJEB3139	SAMEA2012643	ERR157935	Ovis orientalis	Asiatic Mouflon	wild		female
PRJEB3139	SAMEA2065602	ERR332587	Ovis orientalis	Asiatic Mouflon	wild		female
PRJEB3139	SAMEA2065603	ERR332582	Ovis orientalis	Asiatic Mouflon	wild	60 months	male
PRJEB3139	SAMEA2065604	ERR315509	Ovis orientalis	Asiatic Mouflon	wild	24 months	female
PRJEB3139	SAMEA2395410	ERR466546	Ovis orientalis	Asiatic Mouflon	wild		female
PRJEB3139	SAMEA2395411	ERR466544	Ovis orientalis	Asiatic Mouflon	wild		male
PRJNA624020	SAMN14590387	SRR11657635	Ovis orientalis	Asiatic mouflon	wild	12 months	male
PRJNA624020	SAMN14590388	SRR11657636	Ovis orientalis	Asiatic mouflon	wild	12 months	male
PRJNA624020	SAMN14590389	SRR11657637	Ovis orientalis	Asiatic mouflon	wild	12 months	female
PRJNA624020	SAMN14590390	SRR11657638	Ovis orientalis	Asiatic mouflon	wild	12 months	female
PRJNA624020	SAMN14590391	SRR11657639	Ovis orientalis	Asiatic mouflon	wild	12 months	female
PRJNA624020	SAMN14590392	SRR11657640	Ovis orientalis	Asiatic mouflon	wild	12 months	male
PRJNA624020	SAMN14590393	SRR11657641	Ovis orientalis	Asiatic mouflon	wild	12 months	male
PRJNA624020	SAMN14590394	SRR11657642	Ovis orientalis	Asiatic mouflon	wild	12 months	male
PRJNA624020	SAMN14590395	SRR11657500	Ovis orientalis	Asiatic mouflon	wild	12 months	male
PRJNA624020	SAMN14590396	SRR11657501	Ovis orientalis	Asiatic mouflon	wild	12 months	male
PRJNA624020	SAMN14590397	SRR11657502	Ovis orientalis	Asiatic mouflon	wild	12 months	male
PRJNA624020	SAMN14590398	SRR11657503	Ovis orientalis	Asiatic mouflon	wild	12 months	male
PRJNA624020	SAMN14590399	SRR11657504	Ovis orientalis	Asiatic mouflon	wild	12 months	female
PRJNA624020	SAMN14590400	SRR11657505	Ovis orientalis	Asiatic mouflon	wild	12 months	female
PRJNA624020	SAMN14590401	SRR11657506	Ovis orientalis	Asiatic mouflon	wild	12 months	female
PRJNA624020	SAMN14590402	SRR11657507	Ovis orientalis	Asiatic mouflon	wild	12 months	female
PRJNA624020	SAMN14590215	SRR11657476	Ovis aries	East Friesian Dairy Sheep	ef	12 months	female
PRJNA624020	SAMN14590216	SRR11657477	Ovis aries	East Friesian Dairy Sheep	ef	12 months	female
PRJNA624020	SAMN14590217	SRR11657478	Ovis aries	East Friesian Dairy Sheep	ef	12 months	female
PRJNA624020	SAMN14590218	SRR11657479	Ovis aries	East Friesian Dairy Sheep	ef	12 months	female
PRJNA624020	SAMN14590219	SRR11657480	Ovis aries	East Friesian Dairy Sheep	ef	12 months	female
PRJNA624020	SAMN14590220	SRR11657481	Ovis aries	East Friesian Dairy Sheep	ef	12 months	female
PRJNA624020	SAMN14590221	SRR11657482	Ovis aries	East Friesian Dairy Sheep	ef	12 months	not determined
PRJNA624020	SAMN14590222	SRR11657483	Ovis aries	East Friesian Dairy Sheep	ef	12 months	not determined
PRJNA624020	SAMN14590223	SRR11657484	Ovis aries	East Friesian Dairy Sheep	ef	12 months	not determined
PRJNA624020	SAMN14590224	SRR11657485	Ovis aries	East Friesian Dairy Sheep	ef	12 months	not determined

## Sheet: Table S4
Table S4.SNP number
Chr	SNP number
1	3521788
2	3050960
3	2773751
4	1536348
5	1322284
6	1631677
7	1207273
8	1155756
9	1253863
10	1181930
11	687987
12	989503
13	1002633
14	813691
15	1099921
16	962731
17	966613
18	849813
19	734353
20	682326
21	674943
22	680881
23	836253
24	530371
25	644696
26	594964
27	1202932
Total	32590241

## Sheet: Table S5
Table S5.Statistics of SNP detection results
Category	Number of SNPs
intergenic	19937422
intronic	10830681
ncRNA_intronic	776785
downstream	259057
upstream	239559
exonic	198227
UTR3	173157
ncRNA_exonic	114833
UTR5	51400
upstream;downstream	8023
splicing	542
ncRNA_splicing	343
UTR5;UTR3	168
exonic;splicing	33
ncRNA_exonic;splicing	11
Total	32590241

## Sheet: Table S6
Table S6.Nucleotide diversity (PI) values of EFS populations
CHROM	BIN_START	BIN_END	N_VARIANTS	PI
1	1	150000	1115	0.00130401
1	75001	225000	972	0.000980994
1	150001	300000	669	0.000613849
1	225001	375000	687	0.000781123
1	300001	450000	746	0.000980005
1	375001	525000	720	0.000976135
1	450001	600000	924	0.00114694
1	525001	675000	1045	0.00132803
1	600001	750000	808	0.00111803
1	675001	825000	1289	0.00193369
1	750001	900000	1649	0.00246564
1	825001	975000	1404	0.00205252
1	900001	1050000	1207	0.00167447
1	975001	1125000	1056	0.00143494
1	1050001	1200000	1464	0.00189256
1	1125001	1275000	1310	0.00163635
1	1200001	1350000	1174	0.00122363
1	1275001	1425000	2143	0.00219344
1	1350001	1500000	1934	0.00208523
1	1425001	1575000	1569	0.00181753
1	1500001	1650000	2343	0.00311388
1	1575001	1725000	2152	0.00283394
1	1650001	1800000	1182	0.00140617
1	1725001	1875000	1099	0.00141612
1	1800001	1950000	1362	0.00166874
1	1875001	2025000	1419	0.00155943
1	1950001	2100000	1370	0.00151623
1	2025001	2175000	1306	0.00135291
1	2100001	2250000	1167	0.00115269
1	2175001	2325000	1307	0.00129034
1	2250001	2400000	1604	0.00178358
1	2325001	2475000	1439	0.00189917
1	2400001	2550000	1394	0.0017233
1	2475001	2625000	1624	0.001997
1	2550001	2700000	1743	0.0022264
1	2625001	2775000	1465	0.00182803
1	2700001	2850000	1338	0.00152983
1	2775001	2925000	1464	0.00169376
1	2850001	3000000	1476	0.00195214
1	2925001	3075000	779	0.00101822
1	3000001	3150000	675	0.000837831
1	3075001	3225000	1035	0.00134964
1	3150001	3300000	1108	0.00148822
1	3225001	3375000	1204	0.00146639
1	3300001	3450000	1123	0.00113661
1	3375001	3525000	1447	0.00182616
1	3450001	3600000	2135	0.00302638
1	3525001	3675000	2197	0.00294321
1	3600001	3750000	1506	0.00176586
1	3675001	3825000	1323	0.00123379
1	3750001	3900000	1591	0.00153776
1	3825001	3975000	1959	0.00238114
1	3900001	4050000	1958	0.0023921
1	3975001	4125000	1714	0.00201944
1	4050001	4200000	1736	0.00229732
1	4125001	4275000	1878	0.00250859
1	4200001	4350000	1239	0.00160308
1	4275001	4425000	1182	0.00159231
1	4350001	4500000	2028	0.0026324
1	4425001	4575000	2360	0.00316388
1	4500001	4650000	1902	0.00256678
1	4575001	4725000	1251	0.00160164
1	4650001	4800000	1334	0.00172956
1	4725001	4875000	1379	0.00169972
1	4800001	4950000	1496	0.00168933
1	4875001	5025000	1458	0.00151094
1	4950001	5100000	1440	0.00153636
1	5025001	5175000	1667	0.00190414
1	5100001	5250000	1572	0.00189372
1	5175001	5325000	1174	0.00140662
1	5250001	5400000	1082	0.00122955
1	5325001	5475000	1301	0.00129679
1	5400001	5550000	1359	0.00110637
1	5475001	5625000	1393	0.00105088
1	5550001	5700000	1498	0.00146133
1	5625001	5775000	1733	0.00191215
1	5700001	5850000	1883	0.00189671
1	5775001	5925000	1768	0.00168548
1	5850001	6000000	1399	0.00125245
1	5925001	6075000	1245	0.00111586
1	6000001	6150000	1541	0.00165947
1	6075001	6225000	1745	0.00201747
1	6150001	6300000	2058	0.00241074
1	6225001	6375000	2412	0.00261173
1	6300001	6450000	1647	0.00156544
1	6375001	6525000	1491	0.00133096
1	6450001	6600000	1850	0.00165802
1	6525001	6675000	1671	0.00122381
1	6600001	6750000	1812	0.00145197
1	6675001	6825000	1759	0.00150203
1	6750001	6900000	1870	0.00167917
1	6825001	6975000	1657	0.00186981
1	6900001	7050000	1056	0.000869607
1	6975001	7125000	1072	0.000819297
1	7050001	7200000	1697	0.0019577
1	7125001	7275000	2015	0.00226542
1	7200001	7350000	1758	0.00201602
1	7275001	7425000	1318	0.00149719
1	7350001	7500000	1228	0.0011896
1	7425001	7575000	960	0.000915806
1	7500001	7650000	503	0.000513455
1	7575001	7725000	329	0.000364148
1	7650001	7800000	307	0.000326586
1	7725001	7875000	471	0.000618274
1	7800001	7950000	672	0.000785909
1	7875001	8025000	1282	0.00138638
1	7950001	8100000	1397	0.00160543
1	8025001	8175000	1179	0.00149601
1	8100001	8250000	1552	0.00207244
1	8175001	8325000	1500	0.00197317
1	8250001	8400000	1045	0.00125327
1	8325001	8475000	1094	0.00127208
1	8400001	8550000	834	0.00104838
1	8475001	8625000	1166	0.00152223
1	8550001	8700000	1860	0.00243232
1	8625001	8775000	1837	0.00229027
1	8700001	8850000	1831	0.00229044
1	8775001	8925000	2021	0.00260361
1	8850001	9000000	1951	0.00246234
1	8925001	9075000	1642	0.00202234
1	9000001	9150000	1674	0.00197267
1	9075001	9225000	1343	0.0015727
1	9150001	9300000	1235	0.00116159
1	9225001	9375000	1323	0.00120405
1	9300001	9450000	1287	0.00146519
1	9375001	9525000	1059	0.00120825
1	9450001	9600000	511	0.000554544
1	9525001	9675000	565	0.000656553
1	9600001	9750000	1304	0.00156701
1	9675001	9825000	1483	0.00183061
1	9750001	9900000	1195	0.00148655
1	9825001	9975000	1561	0.00167582
1	9900001	10050000	1639	0.00170605
1	9975001	10125000	1306	0.00159004
1	10050001	10200000	1510	0.00198548
1	10125001	10275000	1443	0.00179876
1	10200001	10350000	1187	0.00140818
1	10275001	10425000	1037	0.0012111
1	10350001	10500000	655	0.000606282
1	10425001	10575000	493	0.000386625
1	10500001	10650000	613	0.000682621
1	10575001	10725000	404	0.000489397
1	10650001	10800000	212	0.000152312
1	10725001	10875000	609	0.000665852
1	10800001	10950000	862	0.00116431
1	10875001	11025000	1183	0.00156691
1	10950001	11100000	1340	0.00174424
1	11025001	11175000	945	0.00122945
1	11100001	11250000	570	0.000718802
1	11175001	11325000	582	0.000689491
1	11250001	11400000	592	0.000677243
1	11325001	11475000	635	0.000782577
1	11400001	11550000	845	0.0010825
1	11475001	11625000	830	0.00109023
1	11550001	11700000	1024	0.00132835
1	11625001	11775000	1558	0.0019373
1	11700001	11850000	1612	0.00186105
1	11775001	11925000	1374	0.00166568
1	11850001	12000000	1288	0.0015628
1	11925001	12075000	1199	0.00127966
1	12000001	12150000	1326	0.00156234
1	12075001	12225000	1317	0.0015496
1	12150001	12300000	1271	0.00152216
1	12225001	12375000	1414	0.00179136
1	12300001	12450000	1477	0.0017752
1	12375001	12525000	1316	0.00166877
1	12450001	12600000	710	0.000945989
1	12525001	12675000	406	0.000339539
1	12600001	12750000	1022	0.00109971
1	12675001	12825000	1196	0.00139826
1	12750001	12900000	966	0.00107378
1	12825001	12975000	1253	0.00144136
1	12900001	13050000	1393	0.00167161
1	12975001	13125000	980	0.00118205
1	13050001	13200000	665	0.000650182
1	13125001	13275000	446	0.000387032
1	13200001	13350000	221	0.000243949
1	13275001	13425000	546	0.000570867
1	13350001	13500000	943	0.000890507
1	13425001	13575000	1013	0.000890829
1	13500001	13650000	1091	0.00100886
1	13575001	13725000	1427	0.00125642
1	13650001	13800000	1444	0.00116626
1	13725001	13875000	1128	0.00112783
1	13800001	13950000	1220	0.00145382
1	13875001	14025000	1281	0.0014445
1	13950001	14100000	1458	0.00169504
1	14025001	14175000	1540	0.0019279
1	14100001	14250000	1565	0.0018332
1	14175001	14325000	1416	0.00154859
1	14250001	14400000	874	0.000926115
1	14325001	14475000	781	0.000902366
1	14400001	14550000	852	0.00115699
1	14475001	14625000	775	0.00104812
1	14550001	14700000	674	0.000805783
1	14625001	14775000	740	0.000820018
1	14700001	14850000	869	0.000922202
1	14775001	14925000	1060	0.00114336
1	14850001	15000000	984	0.00125398
1	14925001	15075000	762	0.00109951
1	15000001	15150000	859	0.00118334
1	15075001	15225000	1022	0.00122154
1	15150001	15300000	873	0.000807395
1	15225001	15375000	767	0.000721711
1	15300001	15450000	899	0.000992912
1	15375001	15525000	1071	0.00115234
1	15450001	15600000	1229	0.00129107
1	15525001	15675000	1384	0.00160272
1	15600001	15750000	1336	0.00160984
1	15675001	15825000	1050	0.00128425
1	15750001	15900000	880	0.00104659
1	15825001	15975000	861	0.0010294
1	15900001	16050000	1007	0.001083
1	15975001	16125000	1012	0.00107064
1	16050001	16200000	988	0.00117042
1	16125001	16275000	1112	0.00129606
1	16200001	16350000	852	0.000984672
1	16275001	16425000	838	0.000913231
1	16350001	16500000	966	0.00108096
1	16425001	16575000	892	0.00100474
1	16500001	16650000	992	0.00132468
1	16575001	16725000	972	0.00127628
1	16650001	16800000	1060	0.00121731
1	16725001	16875000	1069	0.001173
1	16800001	16950000	1055	0.00117939
1	16875001	17025000	1245	0.00149485
1	16950001	17100000	1296	0.00157744
1	17025001	17175000	1234	0.0014974
1	17100001	17250000	1193	0.00131175
1	17175001	17325000	1061	0.00117343
1	17250001	17400000	823	0.000885888
1	17325001	17475000	776	0.000626616
1	17400001	17550000	1160	0.000945472
1	17475001	17625000	1466	0.00146227
1	17550001	17700000	1407	0.0014149
1	17625001	17775000	1279	0.00111599
1	17700001	17850000	988	0.0010256
1	17775001	17925000	1001	0.00129191
1	17850001	18000000	1038	0.00127732
1	17925001	18075000	1271	0.00138868
1	18000001	18150000	1584	0.00192151
1	18075001	18225000	1674	0.00221394
1	18150001	18300000	2084	0.00244426
1	18225001	18375000	1971	0.00226278
1	18300001	18450000	1460	0.00170512
1	18375001	18525000	1487	0.00187498
1	18450001	18600000	1415	0.00188048
1	18525001	18675000	770	0.000964708
1	18600001	18750000	721	0.000806624
1	18675001	18825000	1118	0.00123669
1	18750001	18900000	1138	0.00127255
1	18825001	18975000	1118	0.00119577
1	18900001	19050000	1231	0.00143557
1	18975001	19125000	1205	0.00153364
1	19050001	19200000	1119	0.00150879
1	19125001	19275000	833	0.00113413
1	19200001	19350000	797	0.000935192
1	19275001	19425000	914	0.000909454
1	19350001	19500000	799	0.000745155
1	19425001	19575000	877	0.00109023
1	19500001	19650000	1058	0.00145824
1	19575001	19725000	1172	0.00150014
1	19650001	19800000	1301	0.00158779
1	19725001	19875000	1275	0.00149229
1	19800001	19950000	863	0.00098359
1	19875001	20025000	589	0.000747233
1	19950001	20100000	356	0.000445627
1	20025001	20175000	379	0.000471083
1	20100001	20250000	756	0.000706501
1	20175001	20325000	646	0.000439384
1	20250001	20400000	392	0.000383318
1	20325001	20475000	625	0.000827472
1	20400001	20550000	787	0.00105286
1	20475001	20625000	763	0.000977959
1	20550001	20700000	584	0.000742954
1	20625001	20775000	647	0.000804626
1	20700001	20850000	758	0.000942516
1	20775001	20925000	533	0.000733925
1	20850001	21000000	552	0.000830162
1	20925001	21075000	744	0.00105496
1	21000001	21150000	605	0.000840862
1	21075001	21225000	432	0.000457048
1	21150001	21300000	367	0.000257244
1	21225001	21375000	311	0.000310987
1	21300001	21450000	586	0.000583949
1	21375001	21525000	515	0.000409936
1	21450001	21600000	242	0.000195973
1	21525001	21675000	301	0.000354977
1	21600001	21750000	528	0.000690929
1	21675001	21825000	674	0.000824048
1	21750001	21900000	666	0.000817476
1	21825001	21975000	600	0.000850556
1	21900001	22050000	552	0.00075555
1	21975001	22125000	732	0.000864912
1	22050001	22200000	1014	0.00102037
1	22125001	22275000	951	0.000933307
1	22200001	22350000	768	0.000834133
1	22275001	22425000	605	0.000688755
1	22350001	22500000	568	0.000756221
1	22425001	22575000	557	0.000673818
1	22500001	22650000	577	0.000448242
1	22575001	22725000	698	0.000458407
1	22650001	22800000	839	0.000827439
1	22725001	22875000	1080	0.00128621
1	22800001	22950000	1338	0.00157936
1	22875001	23025000	1263	0.00167697
1	22950001	23100000	1273	0.00184362
1	23025001	23175000	1398	0.00171044
1	23100001	23250000	1397	0.00154925
1	23175001	23325000	1591	0.00189733
1	23250001	23400000	1718	0.00212324
1	23325001	23475000	1954	0.00263936
1	23400001	23550000	1709	0.00206585
1	23475001	23625000	1274	0.00119912
1	23550001	23700000	1358	0.00144979
1	23625001	23775000	1396	0.00157541
1	23700001	23850000	1534	0.00194957
1	23775001	23925000	1497	0.00199828
1	23850001	24000000	1015	0.00122943
1	23925001	24075000	1033	0.00117944
1	24000001	24150000	1219	0.00137992
1	24075001	24225000	1094	0.00123012
1	24150001	24300000	1224	0.0014645
1	24225001	24375000	1254	0.00152981
1	24300001	24450000	968	0.00113764
1	24375001	24525000	455	0.000485266
1	24450001	24600000	189	0.000172445
1	24525001	24675000	175	0.000177287
1	24600001	24750000	369	0.000442256
1	24675001	24825000	531	0.000661812
1	24750001	24900000	321	0.000388519
1	24825001	24975000	394	0.000444328
1	24900001	25050000	261	0.000298887
1	24975001	25125000	5	2.34194e-06
1	25050001	25200000	255	0.000283418
1	25125001	25275000	533	0.000606632
1	25200001	25350000	603	0.000641368
1	25275001	25425000	1263	0.00160393
1	25350001	25500000	1937	0.00229634
1	25425001	25575000	2461	0.00333967
1	25500001	25650000	1741	0.00260932
1	25575001	25725000	476	0.000493576
1	25650001	25800000	463	0.000476795
1	25725001	25875000	634	0.000708655
1	25800001	25950000	617	0.000706064
1	25875001	26025000	456	0.000492725
1	25950001	26100000	653	0.000672654
1	26025001	26175000	921	0.00102981
1	26100001	26250000	877	0.00104562
1	26175001	26325000	661	0.000612727
1	26250001	26400000	573	0.000548288
1	26325001	26475000	606	0.000795439
1	26400001	26550000	649	0.000857847
1	26475001	26625000	455	0.00054598
1	26550001	26700000	174	0.000160024
1	26625001	26775000	146	0.000122381
1	26700001	26850000	162	0.000127828
1	26775001	26925000	186	0.000148952
1	26850001	27000000	223	0.000143258
1	26925001	27075000	269	0.000196144
1	27000001	27150000	314	0.000303392
1	27075001	27225000	571	0.000528389
1	27150001	27300000	583	0.000622673
1	27225001	27375000	408	0.000602567
1	27300001	27450000	520	0.000784588
1	27375001	27525000	611	0.000714535
1	27450001	27600000	676	0.000716585
1	27525001	27675000	573	0.000774173
1	27600001	27750000	320	0.000356687
1	27675001	27825000	165	0.000126131
1	27750001	27900000	154	0.000221724
1	27825001	27975000	238	0.000289622
1	27900001	28050000	555	0.000736566
1	27975001	28125000	558	0.000777581
1	28050001	28200000	682	0.000879263
1	28125001	28275000	1061	0.00132486
1	28200001	28350000	800	0.000997971
1	28275001	28425000	485	0.000705473
1	28350001	28500000	366	0.000604722
1	28425001	28575000	274	0.000426215
1	28500001	28650000	419	0.000557499
1	28575001	28725000	605	0.000820923
1	28650001	28800000	704	0.00096271
1	28725001	28875000	819	0.00103156
1	28800001	28950000	1044	0.00132271
1	28875001	29025000	1180	0.00157096
1	28950001	29100000	889	0.00113944
1	29025001	29175000	850	0.000881765
1	29100001	29250000	1081	0.00136464
1	29175001	29325000	913	0.00120103
1	29250001	29400000	508	0.00042233
1	29325001	29475000	382	0.000174722
1	29400001	29550000	627	0.00049934
1	29475001	29625000	760	0.000955345
1	29550001	29700000	662	0.00104591
1	29625001	29775000	642	0.000816565
1	29700001	29850000	786	0.000917767
1	29775001	29925000	784	0.000944716
1	29850001	30000000	910	0.00104321
1	29925001	30075000	1177	0.00134075
1	30000001	30150000	1226	0.00126955
1	30075001	30225000	1003	0.00106529
1	30150001	30300000	968	0.0012373
1	30225001	30375000	1100	0.00155879
1	30300001	30450000	850	0.00124938
1	30375001	30525000	640	0.000871954
1	30450001	30600000	794	0.000904599
1	30525001	30675000	1000	0.00113957
1	30600001	30750000	1218	0.00153768
1	30675001	30825000	1460	0.00149909
1	30750001	30900000	1333	0.00127086
1	30825001	30975000	1165	0.0013742
1	30900001	31050000	1256	0.00150606
1	30975001	31125000	1079	0.00129673
1	31050001	31200000	804	0.00098476
1	31125001	31275000	957	0.00114687
1	31200001	31350000	1163	0.00142266
1	31275001	31425000	1140	0.00135562
1	31350001	31500000	1147	0.00132138
1	31425001	31575000	1080	0.00126251
1	31500001	31650000	862	0.000979712
1	31575001	31725000	997	0.00120262
1	31650001	31800000	1263	0.00156196
1	31725001	31875000	1520	0.00191174
1	31800001	31950000	1564	0.00184745
1	31875001	32025000	1357	0.0015292
1	31950001	32100000	1151	0.00130139
1	32025001	32175000	1302	0.00156304
1	32100001	32250000	1533	0.00198228
1	32175001	32325000	1460	0.00173235
1	32250001	32400000	1182	0.0012274
1	32325001	32475000	1134	0.00138304
1	32400001	32550000	1186	0.00158373
1	32475001	32625000	1068	0.00141275
1	32550001	32700000	1135	0.00156354
1	32625001	32775000	917	0.00124596
1	32700001	32850000	1135	0.0014793
1	32775001	32925000	1506	0.00193836
1	32850001	33000000	1706	0.00204581
1	32925001	33075000	1789	0.00220622
1	33000001	33150000	1690	0.0021109
1	33075001	33225000	1481	0.00187449
1	33150001	33300000	1258	0.00169735
1	33225001	33375000	1235	0.00170724
1	33300001	33450000	1313	0.00186006
1	33375001	33525000	1694	0.00232986
1	33450001	33600000	1674	0.00219194
1	33525001	33675000	1582	0.00190167
1	33600001	33750000	1466	0.00170772
1	33675001	33825000	1395	0.00154925
1	33750001	33900000	1396	0.00164497
1	33825001	33975000	1427	0.00185473
1	33900001	34050000	1640	0.00190658
1	33975001	34125000	1612	0.00183223
1	34050001	34200000	1169	0.00135041
1	34125001	34275000	991	0.000985993
1	34200001	34350000	1292	0.00140575
1	34275001	34425000	1550	0.00204272
1	34350001	34500000	1537	0.0020968
1	34425001	34575000	1307	0.00171627
1	34500001	34650000	1351	0.00175353
1	34575001	34725000	1694	0.0022209
1	34650001	34800000	1793	0.00242668
1	34725001	34875000	1681	0.00219882
1	34800001	34950000	1569	0.00196697
1	34875001	35025000	1061	0.00116928
1	34950001	35100000	758	0.000902364
1	35025001	35175000	695	0.000991852
1	35100001	35250000	785	0.00102259
1	35175001	35325000	1016	0.000988936
1	35250001	35400000	1030	0.000977237
1	35325001	35475000	1229	0.00157987
1	35400001	35550000	1200	0.00157849
1	35475001	35625000	863	0.00104128
1	35550001	35700000	1294	0.00107787
1	35625001	35775000	1101	0.000784137
1	35700001	35850000	278	0.000210673
1	35775001	35925000	543	0.000643509
1	35850001	36000000	1048	0.0013933
1	35925001	36075000	1095	0.00150311
1	36000001	36150000	705	0.000996826
1	36075001	36225000	860	0.00124994
1	36150001	36300000	884	0.00119815
1	36225001	36375000	626	0.000714245
1	36300001	36450000	873	0.00109227
1	36375001	36525000	1267	0.00157134
1	36450001	36600000	1538	0.00165484
1	36525001	36675000	1855	0.0018639
1	36600001	36750000	1565	0.00166769
1	36675001	36825000	1021	0.00135687
1	36750001	36900000	1261	0.0016329
1	36825001	36975000	1654	0.00208791
1	36900001	37050000	1791	0.00226491
1	36975001	37125000	1542	0.00202294
1	37050001	37200000	1102	0.0015068
1	37125001	37275000	954	0.00119793
1	37200001	37350000	1135	0.00146084
1	37275001	37425000	614	0.000775129
1	37350001	37500000	198	0.000196191
1	37425001	37575000	774	0.000808181
1	37500001	37650000	1425	0.00157236
1	37575001	37725000	1403	0.00153125
1	37650001	37800000	1420	0.0016235
1	37725001	37875000	1649	0.00209588
1	37800001	37950000	1462	0.00190011
1	37875001	38025000	953	0.00116322
1	37950001	38100000	1023	0.00113569
1	38025001	38175000	1083	0.00120888
1	38100001	38250000	633	0.000763784
1	38175001	38325000	564	0.000738915
1	38250001	38400000	612	0.00086111
1	38325001	38475000	591	0.000837819
1	38400001	38550000	970	0.00132109
1	38475001	38625000	1166	0.0015996
1	38550001	38700000	697	0.000809381
1	38625001	38775000	769	0.000929219
1	38700001	38850000	827	0.00116544
1	38775001	38925000	680	0.000971593
1	38850001	39000000	1021	0.00123959
1	38925001	39075000	1160	0.00138751
1	39000001	39150000	1243	0.00161635
1	39075001	39225000	1244	0.00144824
1	39150001	39300000	625	0.000646355
1	39225001	39375000	652	0.000759048
1	39300001	39450000	800	0.000907236
1	39375001	39525000	540	0.000548197
1	39450001	39600000	1060	0.00111347
1	39525001	39675000	1418	0.00156676
1	39600001	39750000	846	0.000929432
1	39675001	39825000	711	0.000790897
1	39750001	39900000	871	0.000892186
1	39825001	39975000	515	0.000356163
1	39900001	40050000	673	0.000404188
1	39975001	40125000	912	0.000614045
1	40050001	40200000	774	0.000485537
1	40125001	40275000	918	0.000853041
1	40200001	40350000	1070	0.00124323
1	40275001	40425000	1075	0.00117476
1	40350001	40500000	1333	0.0015237
1	40425001	40575000	1207	0.00147624
1	40500001	40650000	1044	0.00135923
1	40575001	40725000	1067	0.0012841
1	40650001	40800000	848	0.000778296
1	40725001	40875000	873	0.00085059
1	40800001	40950000	966	0.00111406
1	40875001	41025000	885	0.00105572
1	40950001	41100000	813	0.000937684
1	41025001	41175000	1036	0.00119878
1	41100001	41250000	1080	0.00126769
1	41175001	41325000	1087	0.00124942
1	41250001	41400000	1266	0.0014357
1	41325001	41475000	1217	0.00131592
1	41400001	41550000	1073	0.00111939
1	41475001	41625000	816	0.00071741
1	41550001	41700000	815	0.000488788
1	41625001	41775000	831	0.000446924
1	41700001	41850000	954	0.000710239
1	41775001	41925000	1122	0.00100899
1	41850001	42000000	820	0.000780133
1	41925001	42075000	705	0.00073019
1	42000001	42150000	895	0.000954782
1	42075001	42225000	973	0.0010429
1	42150001	42300000	1086	0.0011196
1	42225001	42375000	989	0.00094908
1	42300001	42450000	741	0.000727576
1	42375001	42525000	911	0.00102178
1	42450001	42600000	1142	0.00137473
1	42525001	42675000	963	0.00120405
1	42600001	42750000	921	0.00103647
1	42675001	42825000	1075	0.00106303
1	42750001	42900000	1046	0.00104203
1	42825001	42975000	1118	0.00121612
1	42900001	43050000	1279	0.00157321
1	42975001	43125000	1109	0.0012914
1	43050001	43200000	875	0.000699269
1	43125001	43275000	745	0.00053984
1	43200001	43350000	393	0.000295435
1	43275001	43425000	101	7.26518e-05
1	43350001	43500000	123	8.71233e-05
1	43425001	43575000	283	0.000200142
1	43500001	43650000	803	0.000771808
1	43575001	43725000	1137	0.00125881
1	43650001	43800000	1142	0.00115847
1	43725001	43875000	1150	0.000969682
1	43800001	43950000	1242	0.00110543
1	43875001	44025000	1377	0.00125847
1	43950001	44100000	1153	0.001204
1	44025001	44175000	992	0.00118537
1	44100001	44250000	776	0.000943992
1	44175001	44325000	764	0.000978139
1	44250001	44400000	1261	0.0015452
1	44325001	44475000	1126	0.00124619
1	44400001	44550000	880	0.000932887
1	44475001	44625000	1090	0.00113432
1	44550001	44700000	1130	0.00111513
1	44625001	44775000	1317	0.00132877
1	44700001	44850000	946	0.000945976
1	44775001	44925000	741	0.000866839
1	44850001	45000000	1184	0.00133694
1	44925001	45075000	1440	0.00166301
1	45000001	45150000	1282	0.00148616
1	45075001	45225000	1019	0.00114385
1	45150001	45300000	845	0.00111371
1	45225001	45375000	1013	0.00148607
1	45300001	45450000	1263	0.0016643
1	45375001	45525000	977	0.00125842
1	45450001	45600000	834	0.00104027
1	45525001	45675000	805	0.000909006
1	45600001	45750000	746	0.000904069
1	45675001	45825000	831	0.00102445
1	45750001	45900000	1072	0.00136566
1	45825001	45975000	932	0.00113155
1	45900001	46050000	1071	0.00138128
1	45975001	46125000	1088	0.00150469
1	46050001	46200000	911	0.00112118
1	46125001	46275000	1420	0.00168542
1	46200001	46350000	1410	0.00160258
1	46275001	46425000	890	0.00103774
1	46350001	46500000	1051	0.00132329
1	46425001	46575000	948	0.00111143
1	46500001	46650000	608	0.000689576
1	46575001	46725000	522	0.000632945
1	46650001	46800000	556	0.000678219
1	46725001	46875000	1109	0.00134901
1	46800001	46950000	1281	0.00151647
1	46875001	47025000	1116	0.00126222
1	46950001	47100000	1184	0.00135348
1	47025001	47175000	1413	0.00164588
1	47100001	47250000	1340	0.00155406
1	47175001	47325000	1248	0.00143237
1	47250001	47400000	1191	0.00141387
1	47325001	47475000	545	0.000659878
1	47400001	47550000	42	2.91169e-05
1	47475001	47625000	180	0.000190864
1	47550001	47700000	794	0.000946783
1	47625001	47775000	1336	0.0016392
1	47700001	47850000	1483	0.00186465
1	47775001	47925000	1262	0.00151471
1	47850001	48000000	1059	0.00115745
1	47925001	48075000	910	0.00101834
1	48000001	48150000	1163	0.00152775
1	48075001	48225000	1430	0.00187357
1	48150001	48300000	1252	0.00141403
1	48225001	48375000	928	0.00107239
1	48300001	48450000	780	0.00106928
1	48375001	48525000	845	0.00108078
1	48450001	48600000	543	0.000627289
1	48525001	48675000	861	0.000856345
1	48600001	48750000	1079	0.00116309
1	48675001	48825000	1069	0.0012305
1	48750001	48900000	996	0.000865812
1	48825001	48975000	634	0.000569669
1	48900001	49050000	608	0.0007999
1	48975001	49125000	797	0.000986362
1	49050001	49200000	1119	0.00123499
1	49125001	49275000	1242	0.00145072
1	49200001	49350000	1161	0.00146377
1	49275001	49425000	612	0.000705537
1	49350001	49500000	194	0.000218616
1	49425001	49575000	388	0.000500738
1	49500001	49650000	264	0.00033833
1	49575001	49725000	423	0.000442836
1	49650001	49800000	1079	0.00112807
1	49725001	49875000	1275	0.00147158
1	49800001	49950000	1286	0.00158326
1	49875001	50025000	1144	0.00132558
1	49950001	50100000	1196	0.001183
1	50025001	50175000	1158	0.00116062
1	50100001	50250000	684	0.000718724
1	50175001	50325000	859	0.000742733
1	50250001	50400000	1018	0.00101664
1	50325001	50475000	1003	0.00108794
1	50400001	50550000	1402	0.00174433
1	50475001	50625000	1387	0.00183651
1	50550001	50700000	854	0.000938352
1	50625001	50775000	468	0.000474871
1	50700001	50850000	583	0.000631514
1	50775001	50925000	1039	0.00120243
1	50850001	51000000	947	0.00116447
1	50925001	51075000	978	0.0011083
1	51000001	51150000	752	0.000784972
1	51075001	51225000	640	0.000641339
1	51150001	51300000	837	0.000903599
1	51225001	51375000	287	0.000317774
1	51300001	51450000	349	0.000368519
1	51375001	51525000	1039	0.00115596
1	51450001	51600000	1395	0.00153236
1	51525001	51675000	1224	0.00144387
1	51600001	51750000	937	0.00118913
1	51675001	51825000	810	0.000926246
1	51750001	51900000	1015	0.0011264
1	51825001	51975000	1179	0.00128599
1	51900001	52050000	984	0.000980438
1	51975001	52125000	1017	0.00108911
1	52050001	52200000	1372	0.00167827
1	52125001	52275000	1401	0.00185757
1	52200001	52350000	1239	0.00165526
1	52275001	52425000	1091	0.00134489
1	52350001	52500000	873	0.000971447
1	52425001	52575000	1283	0.00152646
1	52500001	52650000	1422	0.00176945
1	52575001	52725000	1383	0.00153067
1	52650001	52800000	1430	0.0016072
1	52725001	52875000	1077	0.00133521
1	52800001	52950000	1324	0.00162486
1	52875001	53025000	1541	0.00186514
1	52950001	53100000	1368	0.00158827
1	53025001	53175000	1199	0.00132862
1	53100001	53250000	1109	0.00124324
1	53175001	53325000	1445	0.0018179
1	53250001	53400000	1541	0.00189492
1	53325001	53475000	1354	0.0015734
1	53400001	53550000	1410	0.00172118
1	53475001	53625000	1061	0.00121675
1	53550001	53700000	368	0.00037495
1	53625001	53775000	161	0.000138061
1	53700001	53850000	451	0.00054428
1	53775001	53925000	741	0.000921779
1	53850001	54000000	773	0.000863797
1	53925001	54075000	996	0.00113371
1	54000001	54150000	1223	0.00123381
1	54075001	54225000	1136	0.000909264
1	54150001	54300000	1043	0.000821882
1	54225001	54375000	1087	0.000763089
1	54300001	54450000	1295	0.00107615
1	54375001	54525000	1203	0.00121309
1	54450001	54600000	1037	0.00114353
1	54525001	54675000	918	0.000974238
1	54600001	54750000	401	0.000346521
1	54675001	54825000	191	0.000110009
1	54750001	54900000	645	0.000526103
1	54825001	54975000	970	0.000920908
1	54900001	55050000	516	0.00050528
1	54975001	55125000	173	0.000180177
1	55050001	55200000	613	0.000627417
1	55125001	55275000	980	0.000821917
1	55200001	55350000	728	0.000429759
1	55275001	55425000	530	0.000166156
1	55350001	55500000	889	0.000677892
1	55425001	55575000	1090	0.00112481
1	55500001	55650000	879	0.000972686
1	55575001	55725000	714	0.000904929
1	55650001	55800000	809	0.000924854
1	55725001	55875000	890	0.000884933
1	55800001	55950000	801	0.00079447
1	55875001	56025000	666	0.000742418
1	55950001	56100000	906	0.0010784
1	56025001	56175000	727	0.000825865
1	56100001	56250000	189	0.000179865
1	56175001	56325000	382	0.000258326
1	56250001	56400000	1197	0.00119721
1	56325001	56475000	1720	0.00188799
1	56400001	56550000	1503	0.00170532
1	56475001	56625000	1554	0.00193838
1	56550001	56700000	1590	0.00189487
1	56625001	56775000	1488	0.00169302
1	56700001	56850000	1474	0.00169712
1	56775001	56925000	1477	0.00175581
1	56850001	57000000	1687	0.00209276
1	56925001	57075000	1843	0.00223391
1	57000001	57150000	1684	0.00197325
1	57075001	57225000	1304	0.00148859
1	57150001	57300000	1107	0.0013928
1	57225001	57375000	1328	0.00152863
1	57300001	57450000	1583	0.0017636
1	57375001	57525000	1323	0.00159579
1	57450001	57600000	1201	0.00133289
1	57525001	57675000	1344	0.00157303
1	57600001	57750000	1263	0.00142164
1	57675001	57825000	1419	0.00159
1	57750001	57900000	1547	0.00189455
1	57825001	57975000	1402	0.00171784
1	57900001	58050000	1249	0.00139116
1	57975001	58125000	1346	0.00154996
1	58050001	58200000	899	0.00112816
1	58125001	58275000	467	0.000527152
1	58200001	58350000	898	0.000911297
1	58275001	58425000	1072	0.00124728
1	58350001	58500000	982	0.00136744
1	58425001	58575000	805	0.00104998
1	58500001	58650000	906	0.00109568
1	58575001	58725000	1395	0.00155895
1	58650001	58800000	1652	0.00178575
1	58725001	58875000	1319	0.00129831
1	58800001	58950000	1264	0.000945727
1	58875001	59025000	1172	0.00103009
1	58950001	59100000	1010	0.00115313
1	59025001	59175000	1114	0.00134859
1	59100001	59250000	700	0.000771667
1	59175001	59325000	871	0.000870046
1	59250001	59400000	1320	0.00139076
1	59325001	59475000	1315	0.00128062
1	59400001	59550000	1304	0.00129457
1	59475001	59625000	1303	0.00132509
1	59550001	59700000	1510	0.00140233
1	59625001	59775000	1751	0.00182966
1	59700001	59850000	1692	0.00197028
1	59775001	59925000	1540	0.00165984
1	59850001	60000000	1446	0.00157642
1	59925001	60075000	1505	0.0016642
1	60000001	60150000	1788	0.00206396
1	60075001	60225000	1640	0.00187184
1	60150001	60300000	1464	0.00124995
1	60225001	60375000	1380	0.00107523
1	60300001	60450000	1140	0.000876042
1	60375001	60525000	1298	0.000982688
1	60450001	60600000	1395	0.00097977
1	60525001	60675000	1302	0.00108306
1	60600001	60750000	1570	0.00177251
1	60675001	60825000	1976	0.00228448
1	60750001	60900000	2076	0.0025664
1	60825001	60975000	1751	0.00212593
1	60900001	61050000	1557	0.001843
1	60975001	61125000	1672	0.00199077
1	61050001	61200000	1610	0.00186346
1	61125001	61275000	1123	0.0012805
1	61200001	61350000	956	0.00105127
1	61275001	61425000	1166	0.00136476
1	61350001	61500000	1204	0.00139986
1	61425001	61575000	1169	0.00130507
1	61500001	61650000	1455	0.00166453
1	61575001	61725000	1473	0.00180939
1	61650001	61800000	955	0.00131289
1	61725001	61875000	1082	0.00149642
1	61800001	61950000	1244	0.00151545
1	61875001	62025000	1139	0.00132456
1	61950001	62100000	1404	0.00153172
1	62025001	62175000	1497	0.00156858
1	62100001	62250000	1138	0.00137975
1	62175001	62325000	854	0.00106878
1	62250001	62400000	923	0.00116944
1	62325001	62475000	1123	0.00141616
1	62400001	62550000	1155	0.00130579
1	62475001	62625000	916	0.000906521
1	62550001	62700000	824	0.000868646
1	62625001	62775000	837	0.00105014
1	62700001	62850000	534	0.000715971
1	62775001	62925000	440	0.000412545
1	62850001	63000000	787	0.000622659
1	62925001	63075000	718	0.000684469
1	63000001	63150000	265	0.000310888
1	63075001	63225000	594	0.000726265
1	63150001	63300000	1030	0.00137559
1	63225001	63375000	1062	0.00142422
1	63300001	63450000	1232	0.00146827
1	63375001	63525000	1170	0.00138033
1	63450001	63600000	542	0.000657978
1	63525001	63675000	341	0.000358248
1	63600001	63750000	792	0.000737581
1	63675001	63825000	956	0.0009023
1	63750001	63900000	1050	0.00122589
1	63825001	63975000	1151	0.0014306
1	63900001	64050000	578	0.000703881
1	63975001	64125000	427	0.000337018
1	64050001	64200000	1133	0.0012328
1	64125001	64275000	1560	0.00196118
1	64200001	64350000	1595	0.00187272
1	64275001	64425000	1431	0.00171774
1	64350001	64500000	1464	0.00176064
1	64425001	64575000	1221	0.00140346
1	64500001	64650000	531	0.000661328
1	64575001	64725000	108	0.000131113
1	64650001	64800000	598	0.000332922
1	64725001	64875000	1395	0.00137626
1	64800001	64950000	1387	0.0017973
1	64875001	65025000	1199	0.00146288
1	64950001	65100000	1369	0.00162208
1	65025001	65175000	1375	0.00168635
1	65100001	65250000	1363	0.00171804
1	65175001	65325000	1310	0.0017283
1	65250001	65400000	1402	0.00178968
1	65325001	65475000	1462	0.00168902
1	65400001	65550000	1291	0.00147363
1	65475001	65625000	1521	0.00183339
1	65550001	65700000	1277	0.00140842
1	65625001	65775000	523	0.000474225
1	65700001	65850000	496	0.000542768
1	65775001	65925000	913	0.00109157
1	65850001	66000000	962	0.00121962
1	65925001	66075000	894	0.00109763
1	66000001	66150000	1047	0.00134962
1	66075001	66225000	843	0.00102967
1	66150001	66300000	869	0.00109889
1	66225001	66375000	1373	0.00192968
1	66300001	66450000	1374	0.00169
1	66375001	66525000	1113	0.00101458
1	66450001	66600000	1142	0.00118004
1	66525001	66675000	1311	0.00163016
1	66600001	66750000	1413	0.00174815
1	66675001	66825000	1199	0.00151884
1	66750001	66900000	1120	0.00125516
1	66825001	66975000	1264	0.00138829
1	66900001	67050000	1023	0.00112169
1	66975001	67125000	1126	0.00122646
1	67050001	67200000	1246	0.00148657
1	67125001	67275000	981	0.00128479
1	67200001	67350000	1110	0.00146732
1	67275001	67425000	1829	0.00221196
1	67350001	67500000	1726	0.00202046
1	67425001	67575000	1270	0.0013307
1	67500001	67650000	1326	0.00126249
1	67575001	67725000	1526	0.0016451
1	67650001	67800000	1746	0.00212862
1	67725001	67875000	1583	0.00182048
1	67800001	67950000	1384	0.00150345
1	67875001	68025000	1085	0.00127298
1	67950001	68100000	968	0.00122494
1	68025001	68175000	1087	0.0013608
1	68100001	68250000	887	0.00102272
1	68175001	68325000	1047	0.00105599
1	68250001	68400000	1091	0.0011679
1	68325001	68475000	535	0.000729481
1	68400001	68550000	418	0.000527833
1	68475001	68625000	601	0.000578746
1	68550001	68700000	677	0.000649721
1	68625001	68775000	751	0.000975513
1	68700001	68850000	672	0.000984055
1	68775001	68925000	659	0.000898927
1	68850001	69000000	866	0.00115225
1	68925001	69075000	713	0.000865827
1	69000001	69150000	680	0.000854349
1	69075001	69225000	434	0.000577669
1	69150001	69300000	108	0.000132521
1	69225001	69375000	384	0.000507281
1	69300001	69450000	800	0.000932579
1	69375001	69525000	1039	0.00107098
1	69450001	69600000	880	0.000697712
1	69525001	69675000	585	0.000444987
1	69600001	69750000	508	0.000604977
1	69675001	69825000	768	0.00101888
1	69750001	69900000	1187	0.00145083
1	69825001	69975000	1530	0.00170936
1	69900001	70050000	1480	0.00146859
1	69975001	70125000	2420	0.00160726
1	70050001	70200000	3632	0.00232822
1	70125001	70275000	2454	0.00160983
1	70200001	70350000	1526	0.000928031
1	70275001	70425000	1099	0.000683681
1	70350001	70500000	619	0.000449384
1	70425001	70575000	909	0.000606207
1	70500001	70650000	2158	0.00156341
1	70575001	70725000	2459	0.00222
1	70650001	70800000	1232	0.00146761
1	70725001	70875000	1184	0.00148729
1	70800001	70950000	1194	0.00146993
1	70875001	71025000	1061	0.00101057
1	70950001	71100000	1034	0.00105836
1	71025001	71175000	962	0.00115916
1	71100001	71250000	1002	0.00116037
1	71175001	71325000	1157	0.00127032
1	71250001	71400000	1351	0.0015651
1	71325001	71475000	1333	0.00162911
1	71400001	71550000	1151	0.00128568
1	71475001	71625000	795	0.00100287
1	71550001	71700000	473	0.000711972
1	71625001	71775000	528	0.000658898
1	71700001	71850000	878	0.000989506
1	71775001	71925000	1241	0.0013458
1	71850001	72000000	923	0.00098088
1	71925001	72075000	602	0.00067785
1	72000001	72150000	812	0.000917766
1	72075001	72225000	676	0.000798327
1	72150001	72300000	617	0.000764355
1	72225001	72375000	1022	0.00113499
1	72300001	72450000	1074	0.00115103
1	72375001	72525000	680	0.000677285
1	72450001	72600000	686	0.000720028
1	72525001	72675000	478	0.000501802
1	72600001	72750000	109	7.88014e-05
1	72675001	72825000	541	0.00062725
1	72750001	72900000	953	0.00114264
1	72825001	72975000	979	0.00126067
1	72900001	73050000	932	0.00124307
1	72975001	73125000	827	0.0010535
1	73050001	73200000	602	0.000743508
1	73125001	73275000	249	0.000249307
1	73200001	73350000	180	0.000190844
1	73275001	73425000	544	0.00066133
1	73350001	73500000	649	0.000760419
1	73425001	73575000	727	0.000917869
1	73500001	73650000	1018	0.00112835
1	73575001	73725000	709	0.000676523
1	73650001	73800000	629	0.000704301
1	73725001	73875000	817	0.000883138
1	73800001	73950000	776	0.000736644
1	73875001	74025000	858	0.000698387
1	73950001	74100000	977	0.000753731
1	74025001	74175000	972	0.000824893
1	74100001	74250000	941	0.000882328
1	74175001	74325000	913	0.000935942
1	74250001	74400000	926	0.0010716
1	74325001	74475000	702	0.000833839
1	74400001	74550000	545	0.000608084
1	74475001	74625000	536	0.000653266
1	74550001	74700000	553	0.000612779
1	74625001	74775000	562	0.00051687
1	74700001	74850000	366	0.000247555
1	74775001	74925000	433	0.000419295
1	74850001	75000000	704	0.000882714
1	74925001	75075000	1018	0.00139898
1	75000001	75150000	1319	0.00181605
1	75075001	75225000	1337	0.00166726
1	75150001	75300000	1258	0.0014615
1	75225001	75375000	1177	0.00139202
1	75300001	75450000	982	0.00112103
1	75375001	75525000	923	0.00083655
1	75450001	75600000	714	0.000529
1	75525001	75675000	367	0.000303615
1	75600001	75750000	755	0.000846184
1	75675001	75825000	1225	0.00132386
1	75750001	75900000	1244	0.00149902
1	75825001	75975000	1334	0.00170061
1	75900001	76050000	1439	0.00157854
1	75975001	76125000	1348	0.00150415
1	76050001	76200000	967	0.00117318
1	76125001	76275000	844	0.00107638
1	76200001	76350000	830	0.00113148
1	76275001	76425000	1063	0.00122808
1	76350001	76500000	1132	0.00126617
1	76425001	76575000	1046	0.00127262
1	76500001	76650000	975	0.00117725
1	76575001	76725000	983	0.00113015
1	76650001	76800000	1251	0.00159336
1	76725001	76875000	1087	0.00136953
1	76800001	76950000	1370	0.00150859
1	76875001	77025000	1806	0.00214042
1	76950001	77100000	1690	0.00208774
1	77025001	77175000	1720	0.00222039
1	77100001	77250000	1964	0.0024551
1	77175001	77325000	1685	0.00190217
1	77250001	77400000	1537	0.00182459
1	77325001	77475000	1333	0.00172174
1	77400001	77550000	1137	0.00150105
1	77475001	77625000	1425	0.00179998
1	77550001	77700000	1341	0.001683
1	77625001	77775000	1290	0.0016821
1	77700001	77850000	1236	0.00160158
1	77775001	77925000	1035	0.00130087
1	77850001	78000000	880	0.00111664
1	77925001	78075000	795	0.000944428
1	78000001	78150000	803	0.00101482
1	78075001	78225000	1048	0.00143686
1	78150001	78300000	1322	0.00171661
1	78225001	78375000	1401	0.00175182
1	78300001	78450000	1473	0.00174697
1	78375001	78525000	1683	0.00205282
1	78450001	78600000	1251	0.00156552
1	78525001	78675000	907	0.00109256
1	78600001	78750000	1157	0.00107653
1	78675001	78825000	1241	0.00108825
1	78750001	78900000	1333	0.00142652
1	78825001	78975000	1244	0.00145006
1	78900001	79050000	586	0.00074379
1	78975001	79125000	29	1.45321e-05
1	79050001	79200000	532	0.000628112
1	79125001	79275000	1175	0.00136735
1	79200001	79350000	1281	0.00155808
1	79275001	79425000	1297	0.00149437
1	79350001	79500000	1376	0.00149274
1	79425001	79575000	1428	0.00176932
1	79500001	79650000	1261	0.00160549
1	79575001	79725000	930	0.00106235
1	79650001	79800000	833	0.000744041
1	79725001	79875000	853	0.000697985
1	79800001	79950000	486	0.000433241
1	79875001	80025000	581	0.000758427
1	79950001	80100000	1105	0.00141491
1	80025001	80175000	1302	0.00140812
1	80100001	80250000	1140	0.00118879
1	80175001	80325000	1354	0.00160246
1	80250001	80400000	1390	0.00165136
1	80325001	80475000	1267	0.00153937
1	80400001	80550000	1630	0.0019179
1	80475001	80625000	1350	0.00142211
1	80550001	80700000	802	0.000737413
1	80625001	80775000	400	0.000315767
1	80700001	80850000	956	0.000911895
1	80775001	80925000	1539	0.0015976
1	80850001	81000000	1756	0.00194825
1	80925001	81075000	1736	0.00178857
1	81000001	81150000	1628	0.00155571
1	81075001	81225000	1378	0.00150526
1	81150001	81300000	1013	0.0011265
1	81225001	81375000	1482	0.0016263
1	81300001	81450000	1605	0.00177799
1	81375001	81525000	1200	0.00115841
1	81450001	81600000	1232	0.00123157
1	81525001	81675000	1515	0.00158047
1	81600001	81750000	1488	0.00160303
1	81675001	81825000	1385	0.00171684
1	81750001	81900000	1193	0.0016072
1	81825001	81975000	805	0.00105335
1	81900001	82050000	814	0.000991603
1	81975001	82125000	1162	0.00143986
1	82050001	82200000	1296	0.00156375
1	82125001	82275000	1226	0.00139902
1	82200001	82350000	1127	0.00122161
1	82275001	82425000	1089	0.00121784
1	82350001	82500000	1097	0.00133028
1	82425001	82575000	1288	0.00172681
1	82500001	82650000	1457	0.00203617
1	82575001	82725000	1013	0.00133452
1	82650001	82800000	562	0.000648401
1	82725001	82875000	758	0.000822142
1	82800001	82950000	931	0.00106445
1	82875001	83025000	1068	0.0011128
1	82950001	83100000	1216	0.00128736
1	83025001	83175000	1082	0.00128189
1	83100001	83250000	880	0.000982588
1	83175001	83325000	1258	0.00158277
1	83250001	83400000	1398	0.00188195
1	83325001	83475000	1307	0.00168049
1	83400001	83550000	1336	0.00158962
1	83475001	83625000	913	0.00107415
1	83550001	83700000	973	0.00123733
1	83625001	83775000	1421	0.00186427
1	83700001	83850000	1435	0.00187741
1	83775001	83925000	1436	0.00171432
1	83850001	84000000	1525	0.00176518
1	83925001	84075000	1510	0.0018644
1	84000001	84150000	1616	0.00204638
1	84075001	84225000	1722	0.00211555
1	84150001	84300000	1764	0.00207042
1	84225001	84375000	1836	0.00210156
1	84300001	84450000	1583	0.00183583
1	84375001	84525000	1453	0.00176066
1	84450001	84600000	1331	0.00158472
1	84525001	84675000	766	0.000748212
1	84600001	84750000	974	0.0010797
1	84675001	84825000	1593	0.00174063
1	84750001	84900000	1577	0.00174093
1	84825001	84975000	1527	0.00189402
1	84900001	85050000	1625	0.00205114
1	84975001	85125000	1486	0.00190584
1	85050001	85200000	1092	0.00127714
1	85125001	85275000	1155	0.00101412
1	85200001	85350000	1095	0.000958131
1	85275001	85425000	705	0.000844087
1	85350001	85500000	1277	0.00165224
1	85425001	85575000	1689	0.00224373
1	85500001	85650000	1247	0.00163074
1	85575001	85725000	1430	0.00181475
1	85650001	85800000	1736	0.0022736
1	85725001	85875000	1621	0.00180549
1	85800001	85950000	1517	0.00145651
1	85875001	86025000	1544	0.00172838
1	85950001	86100000	1651	0.00186916
1	86025001	86175000	1807	0.00190028
1	86100001	86250000	1477	0.00171933
1	86175001	86325000	1072	0.0014718
1	86250001	86400000	1304	0.0016107
1	86325001	86475000	1219	0.00144989
1	86400001	86550000	1011	0.00131652
1	86475001	86625000	1346	0.00190534
1	86550001	86700000	2064	0.00277895
1	86625001	86775000	2287	0.00288515
1	86700001	86850000	1991	0.00237461
1	86775001	86925000	2336	0.00288805
1	86850001	87000000	2566	0.00321321
1	86925001	87075000	2056	0.00228466
1	87000001	87150000	1357	0.00151623
1	87075001	87225000	1028	0.00128488
1	87150001	87300000	1285	0.00113574
1	87225001	87375000	1404	0.00087806
1	87300001	87450000	1319	0.000796231
1	87375001	87525000	1485	0.00103465
1	87450001	87600000	1514	0.00136771
1	87525001	87675000	1274	0.00140125
1	87600001	87750000	1580	0.00166836
1	87675001	87825000	1653	0.0019025
1	87750001	87900000	1199	0.00146696
1	87825001	87975000	1231	0.00125593
1	87900001	88050000	1816	0.00195209
1	87975001	88125000	1899	0.00217822
1	88050001	88200000	1651	0.00190576
1	88125001	88275000	1658	0.00187455
1	88200001	88350000	1652	0.00179932
1	88275001	88425000	1619	0.00182727
1	88350001	88500000	1408	0.00156384
1	88425001	88575000	1367	0.00118075
1	88500001	88650000	1506	0.00139461
1	88575001	88725000	1669	0.00177483
1	88650001	88800000	1487	0.0015959
1	88725001	88875000	1317	0.001609
1	88800001	88950000	1520	0.00195298
1	88875001	89025000	1331	0.00162209
1	88950001	89100000	1173	0.00135536
1	89025001	89175000	1176	0.00130294
1	89100001	89250000	1061	0.00113676
1	89175001	89325000	1146	0.00134323
1	89250001	89400000	1218	0.00152951
1	89325001	89475000	1348	0.00164632
1	89400001	89550000	1523	0.00171268
1	89475001	89625000	1539	0.00180417
1	89550001	89700000	1347	0.00169399
1	89625001	89775000	1114	0.00132049
1	89700001	89850000	1279	0.00154409
1	89775001	89925000	1530	0.00196297
1	89850001	90000000	1514	0.0020003
1	89925001	90075000	1467	0.00178612
1	90000001	90150000	1533	0.00177047
1	90075001	90225000	1102	0.00120443
1	90150001	90300000	733	0.000559257
1	90225001	90375000	812	0.000535073
1	90300001	90450000	1117	0.000952216
1	90375001	90525000	1174	0.00115951
1	90450001	90600000	948	0.00109437
1	90525001	90675000	858	0.00113259
1	90600001	90750000	825	0.000986308
1	90675001	90825000	1248	0.00150356
1	90750001	90900000	1423	0.00176922
1	90825001	90975000	1076	0.0013837
1	90900001	91050000	1056	0.00140563
1	90975001	91125000	1063	0.001347
1	91050001	91200000	716	0.000896362
1	91125001	91275000	669	0.000926345
1	91200001	91350000	646	0.00088015
1	91275001	91425000	558	0.000681836
1	91350001	91500000	782	0.000948304
1	91425001	91575000	1449	0.00173298
1	91500001	91650000	1848	0.00224463
1	91575001	91725000	1434	0.00195039
1	91650001	91800000	912	0.00128813
1	91725001	91875000	585	0.000786013
1	91800001	91950000	515	0.00078362
1	91875001	92025000	830	0.00124146
1	91950001	92100000	1005	0.00142071
1	92025001	92175000	760	0.0010017
1	92100001	92250000	653	0.000823028
1	92175001	92325000	997	0.00125098
1	92250001	92400000	1135	0.00151139
1	92325001	92475000	1133	0.00154643
1	92400001	92550000	1101	0.00142302
1	92475001	92625000	988	0.00120074
1	92550001	92700000	1151	0.00142125
1	92625001	92775000	1172	0.00146787
1	92700001	92850000	989	0.00127531
1	92775001	92925000	908	0.00109949
1	92850001	93000000	747	0.000795223
1	92925001	93075000	514	0.000461467
1	93000001	93150000	658	0.000665547
1	93075001	93225000	1038	0.00131217
1	93150001	93300000	1490	0.00201713
1	93225001	93375000	1686	0.00219906
1	93300001	93450000	1416	0.00163574
1	93375001	93525000	661	0.000651043
1	93450001	93600000	326	0.000385164
1	93525001	93675000	918	0.00132492
1	93600001	93750000	1488	0.0020239
1	93675001	93825000	1343	0.00163008
1	93750001	93900000	710	0.000856091
1	93825001	93975000	662	0.000974256
1	93900001	94050000	1064	0.00159894
1	93975001	94125000	1105	0.00146877
1	94050001	94200000	904	0.000957772
1	94125001	94275000	894	0.00099598
1	94200001	94350000	803	0.00101476
1	94275001	94425000	985	0.00103115
1	94350001	94500000	1503	0.00140505
1	94425001	94575000	1259	0.00127569
1	94500001	94650000	727	0.000808676
1	94575001	94725000	458	0.0004547
1	94650001	94800000	367	0.000329352
1	94725001	94875000	432	0.000381006
1	94800001	94950000	873	0.000680228
1	94875001	95025000	957	0.000781696
1	94950001	95100000	760	0.000746969
1	95025001	95175000	787	0.000740875
1	95100001	95250000	863	0.000831992
1	95175001	95325000	601	0.00062348
1	95250001	95400000	631	0.000561435
1	95325001	95475000	1373	0.00110495
1	95400001	95550000	1467	0.00125125
1	95475001	95625000	1061	0.00100093
1	95550001	95700000	1244	0.00112734
1	95625001	95775000	1423	0.00139417
1	95700001	95850000	1159	0.0011664
1	95775001	95925000	867	0.000820017
1	95850001	96000000	775	0.000856419
1	95925001	96075000	959	0.00107191
1	96000001	96150000	824	0.000849668
1	96075001	96225000	845	0.000915835
1	96150001	96300000	1021	0.00128685
1	96225001	96375000	1213	0.00133772
1	96300001	96450000	1587	0.00155766
1	96375001	96525000	1400	0.00146159
1	96450001	96600000	754	0.000749053
1	96525001	96675000	588	0.000484375
1	96600001	96750000	782	0.000715549
1	96675001	96825000	683	0.000678487
1	96750001	96900000	505	0.000394707
1	96825001	96975000	595	0.000447847
1	96900001	97050000	727	0.000691022
1	96975001	97125000	485	0.000523323
1	97050001	97200000	216	0.000249156
1	97125001	97275000	477	0.000509927
1	97200001	97350000	925	0.00100329
1	97275001	97425000	967	0.00105663
1	97350001	97500000	1016	0.00113579
1	97425001	97575000	1178	0.00136352
1	97500001	97650000	1295	0.00121882
1	97575001	97725000	1580	0.00139296
1	97650001	97800000	1455	0.00137699
1	97725001	97875000	1263	0.00108896
1	97800001	97950000	1269	0.0012156
1	97875001	98025000	1068	0.00113831
1	97950001	98100000	1203	0.00131517
1	98025001	98175000	1404	0.00154347
1	98100001	98250000	1380	0.00138878
1	98175001	98325000	1394	0.0014709
1	98250001	98400000	1290	0.00156204
1	98325001	98475000	1156	0.00145772
1	98400001	98550000	1260	0.00162467
1	98475001	98625000	1220	0.00158699
1	98550001	98700000	1033	0.00120898
1	98625001	98775000	1086	0.00120789
1	98700001	98850000	986	0.000860461
1	98775001	98925000	879	0.000771087
1	98850001	99000000	1008	0.00117074
1	98925001	99075000	1024	0.00101916
1	99000001	99150000	1278	0.00141448
1	99075001	99225000	1524	0.00185287
1	99150001	99300000	1317	0.0015885
1	99225001	99375000	1199	0.00153231
1	99300001	99450000	1515	0.00187569
1	99375001	99525000	1600	0.00186773
1	99450001	99600000	1307	0.0014315
1	99525001	99675000	1231	0.00122158
1	99600001	99750000	921	0.000893895
1	99675001	99825000	703	0.000609231
1	99750001	99900000	680	0.000523442
1	99825001	99975000	858	0.000839911
1	99900001	100050000	1317	0.00150304
1	99975001	100125000	1173	0.00131299
1	100050001	100200000	936	0.000952846
1	100125001	100275000	1150	0.00127089
1	100200001	100350000	1291	0.00140893
1	100275001	100425000	1182	0.00134852
1	100350001	100500000	784	0.000998348
1	100425001	100575000	898	0.00105967
1	100500001	100650000	1080	0.0010739
1	100575001	100725000	559	0.000498945
1	100650001	100800000	531	0.000596561
1	100725001	100875000	1039	0.00123949
1	100800001	100950000	1009	0.00120225
1	100875001	101025000	986	0.00118652
1	100950001	101100000	1061	0.00134739
1	101025001	101175000	1145	0.00152787
1	101100001	101250000	1270	0.00165405
1	101175001	101325000	1175	0.00134042
1	101250001	101400000	1265	0.00139316
1	101325001	101475000	1210	0.00131156
1	101400001	101550000	997	0.0010528
1	101475001	101625000	1076	0.00108462
1	101550001	101700000	1158	0.00124797
1	101625001	101775000	1125	0.00143575
1	101700001	101850000	833	0.00111893
1	101775001	101925000	504	0.00053637
1	101850001	102000000	519	0.000539019
1	101925001	102075000	927	0.00124171
1	102000001	102150000	1288	0.00167256
1	102075001	102225000	1270	0.00151499
1	102150001	102300000	1110	0.0011905
1	102225001	102375000	878	0.000761297
1	102300001	102450000	682	0.000689248
1	102375001	102525000	727	0.00094007
1	102450001	102600000	880	0.00108424
1	102525001	102675000	1241	0.00147596
1	102600001	102750000	1689	0.00210429
1	102675001	102825000	1516	0.00197962
1	102750001	102900000	1193	0.00136025
1	102825001	102975000	1086	0.000989143
1	102900001	103050000	817	0.000789319
1	102975001	103125000	576	0.000661365
1	103050001	103200000	789	0.000967488
1	103125001	103275000	991	0.00104771
1	103200001	103350000	754	0.000683144
1	103275001	103425000	404	0.000408517
1	103350001	103500000	428	0.000491419
1	103425001	103575000	558	0.000615774
1	103500001	103650000	477	0.000488621
1	103575001	103725000	503	0.000530412
1	103650001	103800000	671	0.0006732
1	103725001	103875000	828	0.000914197
1	103800001	103950000	1061	0.00125112
1	103875001	104025000	1554	0.00179107
1	103950001	104100000	1651	0.00194492
1	104025001	104175000	869	0.00101466
1	104100001	104250000	729	0.000677654
1	104175001	104325000	1233	0.00144317
1	104250001	104400000	1098	0.00138762
1	104325001	104475000	842	0.000876961
1	104400001	104550000	819	0.000841966
1	104475001	104625000	783	0.000978547
1	104550001	104700000	806	0.00107933
1	104625001	104775000	979	0.00120738
1	104700001	104850000	972	0.0011969
1	104775001	104925000	762	0.000964139
1	104850001	105000000	594	0.000713824
1	104925001	105075000	482	0.000545192
1	105000001	105150000	267	0.000303461
1	105075001	105225000	362	0.000359768
1	105150001	105300000	701	0.000800218
1	105225001	105375000	851	0.00114472
1	105300001	105450000	841	0.000995085
1	105375001	105525000	657	0.000782096
1	105450001	105600000	806	0.00110182
1	105525001	105675000	1080	0.00141862
1	105600001	105750000	845	0.00114432
1	105675001	105825000	611	0.000706598
1	105750001	105900000	533	0.000619304
1	105825001	105975000	907	0.00110154
1	105900001	106050000	1173	0.00146955
1	105975001	106125000	889	0.0011671
1	106050001	106200000	758	0.000967136
1	106125001	106275000	711	0.000942736
1	106200001	106350000	742	0.000936755
1	106275001	106425000	773	0.000939832
1	106350001	106500000	767	0.000877533
1	106425001	106575000	764	0.000748738
1	106500001	106650000	741	0.000673958
1	106575001	106725000	649	0.00063548
1	106650001	106800000	652	0.000724697
1	106725001	106875000	611	0.000734142
1	106800001	106950000	688	0.000974668
1	106875001	107025000	689	0.0010564
1	106950001	107100000	828	0.00116491
1	107025001	107175000	1030	0.00143849
1	107100001	107250000	1066	0.00153885
1	107175001	107325000	983	0.00136274
1	107250001	107400000	735	0.000905244
1	107325001	107475000	517	0.000639816
1	107400001	107550000	371	0.000488558
1	107475001	107625000	454	0.000483448
1	107550001	107700000	492	0.000505633
1	107625001	107775000	238	0.000252265
1	107700001	107850000	252	0.000286576
1	107775001	107925000	503	0.000684887
1	107850001	108000000	752	0.00107343
1	107925001	108075000	1058	0.00137617
1	108000001	108150000	1051	0.00123402
1	108075001	108225000	719	0.00068675
1	108150001	108300000	886	0.000779432
1	108225001	108375000	1719	0.00158471
1	108300001	108450000	1388	0.00124503
1	108375001	108525000	486	0.00043574
1	108450001	108600000	808	0.000870058
1	108525001	108675000	1285	0.00134347
1	108600001	108750000	931	0.000959837
1	108675001	108825000	1089	0.00121826
1	108750001	108900000	1581	0.00181971
1	108825001	108975000	1387	0.00165073
1	108900001	109050000	613	0.000720078
1	108975001	109125000	406	0.000581962
1	109050001	109200000	913	0.00121167
1	109125001	109275000	723	0.000833841
1	109200001	109350000	446	0.000467488
1	109275001	109425000	423	0.000500526
1	109350001	109500000	203	0.000243884
1	109425001	109575000	307	0.000418378
1	109500001	109650000	721	0.00108028
1	109575001	109725000	1195	0.00179683
1	109650001	109800000	1424	0.00190207
1	109725001	109875000	1102	0.00123048
1	109800001	109950000	1256	0.00136439
1	109875001	110025000	1459	0.0018045
1	109950001	110100000	665	0.000898177
1	110025001	110175000	603	0.000458815
1	110100001	110250000	1135	0.00119613
1	110175001	110325000	943	0.0012562
1	110250001	110400000	680	0.000896323
1	110325001	110475000	407	0.000516041
1	110400001	110550000	303	0.000279468
1	110475001	110625000	629	0.000482708
1	110550001	110700000	587	0.000527954
1	110625001	110775000	383	0.000519931
1	110700001	110850000	799	0.000861163
1	110775001	110925000	1145	0.0014055
1	110850001	111000000	903	0.00116197
1	110925001	111075000	685	0.000610744
1	111000001	111150000	680	0.000632625
1	111075001	111225000	628	0.000633715
1	111150001	111300000	901	0.00102726
1	111225001	111375000	1070	0.00122044
1	111300001	111450000	632	0.000649667
1	111375001	111525000	357	0.000398169
1	111450001	111600000	426	0.000502469
1	111525001	111675000	589	0.000650484
1	111600001	111750000	575	0.000669627
1	111675001	111825000	327	0.000376881
1	111750001	111900000	290	0.00029615
1	111825001	111975000	566	0.00053462
1	111900001	112050000	845	0.000895734
1	111975001	112125000	803	0.00103284
1	112050001	112200000	831	0.00118308
1	112125001	112275000	952	0.00135632
1	112200001	112350000	809	0.00113104
1	112275001	112425000	745	0.00103494
1	112350001	112500000	789	0.00115324
1	112425001	112575000	750	0.00116653
1	112500001	112650000	675	0.000999375
1	112575001	112725000	634	0.000671103
1	112650001	112800000	758	0.000757328
1	112725001	112875000	856	0.00107551
1	112800001	112950000	876	0.00118181
1	112875001	113025000	787	0.00104285
1	112950001	113100000	621	0.000769916
1	113025001	113175000	601	0.00069209
1	113100001	113250000	548	0.000491525
1	113175001	113325000	769	0.000430841
1	113250001	113400000	941	0.000690135
1	113325001	113475000	468	0.000435946
1	113400001	113550000	155	0.000108603
1	113475001	113625000	244	0.000201815
1	113550001	113700000	500	0.000540053
1	113625001	113775000	1249	0.00145346
1	113700001	113850000	1628	0.00198831
1	113775001	113925000	1355	0.00173801
1	113850001	114000000	725	0.000940056
1	113925001	114075000	396	0.000596348
1	114000001	114150000	876	0.00126125
1	114075001	114225000	988	0.00140795
1	114150001	114300000	1082	0.00122345
1	114225001	114375000	1310	0.00148356
1	114300001	114450000	1379	0.00187528
1	114375001	114525000	1219	0.00170991
1	114450001	114600000	1411	0.00185211
1	114525001	114675000	1350	0.00177739
1	114600001	114750000	1002	0.00143021
1	114675001	114825000	909	0.00121188
1	114750001	114900000	692	0.000819578
1	114825001	114975000	1119	0.00129835
1	114900001	115050000	1405	0.00141772
1	114975001	115125000	998	0.000824869
1	115050001	115200000	653	0.000511413
1	115125001	115275000	949	0.000795877
1	115200001	115350000	1049	0.00104826
1	115275001	115425000	1217	0.00161372
1	115350001	115500000	863	0.00118728
1	115425001	115575000	192	0.000202468
1	115500001	115650000	148	0.000154012
1	115575001	115725000	19	1.56168e-05
1	115650001	115800000	98	9.56692e-05
1	115725001	115875000	1012	0.00105555
1	115800001	115950000	1303	0.00137194
1	115875001	116025000	839	0.000740121
1	115950001	116100000	1151	0.00127869
1	116025001	116175000	1262	0.0017181
1	116100001	116250000	815	0.000974245
1	116175001	116325000	265	0.000196337
1	116250001	116400000	790	0.000915256
1	116325001	116475000	1328	0.00147658
1	116400001	116550000	1391	0.00148745
1	116475001	116625000	1507	0.0017693
1	116550001	116700000	1135	0.00129695
1	116625001	116775000	950	0.00103664
1	116700001	116850000	787	0.000934255
1	116775001	116925000	758	0.000923183
1	116850001	117000000	1198	0.00149258
1	116925001	117075000	1351	0.00169604
1	117000001	117150000	954	0.00113648
1	117075001	117225000	796	0.00100522
1	117150001	117300000	543	0.000712037
1	117225001	117375000	123	9.72728e-05
1	117300001	117450000	51	3.50509e-05
1	117375001	117525000	285	0.000345881
1	117450001	117600000	734	0.000964744
1	117525001	117675000	920	0.0012961
1	117600001	117750000	1171	0.00156451
1	117675001	117825000	1128	0.00154557
1	117750001	117900000	1040	0.00143237
1	117825001	117975000	1012	0.00131527
1	117900001	118050000	771	0.00111296
1	117975001	118125000	646	0.000931695
1	118050001	118200000	486	0.000672746
1	118125001	118275000	734	0.000994182
1	118200001	118350000	796	0.00100027
1	118275001	118425000	765	0.000876961
1	118350001	118500000	851	0.000974507
1	118425001	118575000	601	0.000643892
1	118500001	118650000	599	0.000694612
1	118575001	118725000	984	0.0012908
1	118650001	118800000	1191	0.00133206
1	118725001	118875000	739	0.00058941
1	118800001	118950000	565	0.000363558
1	118875001	119025000	440	0.00030933
1	118950001	119100000	85	4.43668e-05
1	119025001	119175000	389	0.000357511
1	119100001	119250000	1008	0.00114553
1	119175001	119325000	670	0.000812363
1	119250001	119400000	22	8.93268e-06
1	119325001	119475000	326	0.000256402
1	119400001	119550000	1006	0.00106596
1	119475001	119625000	970	0.00111925
1	119550001	119700000	378	0.000398145
1	119625001	119775000	509	0.000573223
1	119700001	119850000	840	0.00115584
1	119775001	119925000	860	0.00117143
1	119850001	120000000	430	0.000497981
1	119925001	120075000	251	0.000318869
1	120000001	120150000	720	0.000898239
1	120075001	120225000	946	0.00118929
1	120150001	120300000	861	0.00089836
1	120225001	120375000	639	0.000442158
1	120300001	120450000	440	0.000270123
1	120375001	120525000	350	0.000248799
1	120450001	120600000	402	0.000287907
1	120525001	120675000	734	0.00045427
1	120600001	120750000	1049	0.000586051
1	120675001	120825000	1155	0.000729494
1	120750001	120900000	1221	0.000859678
1	120825001	120975000	1282	0.00089096
1	120900001	121050000	935	0.000702571
1	120975001	121125000	562	0.000542814
1	121050001	121200000	814	0.000783584
1	121125001	121275000	594	0.000500849
1	121200001	121350000	190	0.000127405
1	121275001	121425000	523	0.0004413
1	121350001	121500000	928	0.00103819
1	121425001	121575000	861	0.00102985
1	121500001	121650000	662	0.000742216
1	121575001	121725000	622	0.000689492
1	121650001	121800000	639	0.000832263
1	121725001	121875000	1002	0.00130221
1	121800001	121950000	1217	0.00142863
1	121875001	122025000	1299	0.00159147
1	121950001	122100000	1609	0.00212014
1	122025001	122175000	1304	0.00170394
1	122100001	122250000	519	0.000596415
1	122175001	122325000	421	0.000382896
1	122250001	122400000	754	0.000819464
1	122325001	122475000	1048	0.0013292
1	122400001	122550000	1278	0.00153205
1	122475001	122625000	942	0.00107689
1	122550001	122700000	658	0.000671337
1	122625001	122775000	856	0.0006732
1	122700001	122850000	1084	0.000778194
1	122775001	122925000	796	0.000614453
1	122850001	123000000	905	0.000817262
1	122925001	123075000	1230	0.00114862
1	123000001	123150000	1179	0.00114921
1	123075001	123225000	882	0.000818578
1	123150001	123300000	841	0.000793919
1	123225001	123375000	1042	0.00105593
1	123300001	123450000	500	0.000510619
1	123375001	123525000	418	0.000465758
1	123450001	123600000	761	0.00092323
1	123525001	123675000	716	0.000784924
1	123600001	123750000	877	0.000950079
1	123675001	123825000	1224	0.00147641
1	123750001	123900000	1089	0.00118787
1	123825001	123975000	640	0.000698254
1	123900001	124050000	611	0.000738989
1	123975001	124125000	820	0.000821689
1	124050001	124200000	598	0.000567632
1	124125001	124275000	714	0.000651439
1	124200001	124350000	784	0.000631879
1	124275001	124425000	311	0.000205908
1	124350001	124500000	329	0.00038785
1	124425001	124575000	696	0.000610497
1	124500001	124650000	662	0.00047651
1	124575001	124725000	636	0.000548672
1	124650001	124800000	807	0.000742782
1	124725001	124875000	812	0.000733652
1	124800001	124950000	737	0.000643375
1	124875001	125025000	733	0.000664851
1	124950001	125100000	637	0.000500449
1	125025001	125175000	643	0.00045653
1	125100001	125250000	861	0.000619612
1	125175001	125325000	1059	0.000874361
1	125250001	125400000	838	0.000734977
1	125325001	125475000	575	0.000556449
1	125400001	125550000	770	0.000815499
1	125475001	125625000	776	0.000595965
1	125550001	125700000	783	0.000404254
1	125625001	125775000	790	0.000357792
1	125700001	125850000	461	0.000141865
1	125775001	125925000	434	0.000212523
1	125850001	126000000	881	0.000716318
1	125925001	126075000	560	0.000538645
1	126000001	126150000	21	8.84698e-06
1	126075001	126225000	24	9.96689e-06
1	126150001	126300000	89	5.0223e-05
1	126225001	126375000	681	0.000492205
1	126300001	126450000	1236	0.000970725
1	126375001	126525000	829	0.0006042
1	126450001	126600000	485	0.000437364
1	126525001	126675000	459	0.000544829
1	126600001	126750000	202	0.00020428
1	126675001	126825000	477	0.0002294
1	126750001	126900000	756	0.000372033
1	126825001	126975000	626	0.000443905
1	126900001	127050000	721	0.000655373
1	126975001	127125000	583	0.000500902
1	127050001	127200000	239	0.000206177
1	127125001	127275000	196	0.000259724
1	127200001	127350000	396	0.000611133
1	127275001	127425000	548	0.000780805
1	127350001	127500000	725	0.000736472
1	127425001	127575000	872	0.000886189
1	127500001	127650000	615	0.000679726
1	127575001	127725000	415	0.000373846
1	127650001	127800000	640	0.000607678
1	127725001	127875000	568	0.000598843
1	127800001	127950000	218	0.000266182
1	127875001	128025000	118	0.000150998
1	127950001	128100000	125	0.000137345
1	128025001	128175000	161	0.000136421
1	128100001	128250000	164	0.000139568
1	128175001	128325000	166	0.000125608
1	128250001	128400000	411	0.00025515
1	128325001	128475000	624	0.000487381
1	128400001	128550000	605	0.000550151
1	128475001	128625000	599	0.000856514
1	128550001	128700000	1396	0.00283984
1	128625001	128775000	1464	0.00280695
1	128700001	128850000	825	0.000827603
1	128775001	128925000	792	0.000512763
1	128850001	129000000	775	0.00066818
1	128925001	129075000	1121	0.00134079
1	129000001	129150000	1176	0.0015562
1	129075001	129225000	495	0.000633582
1	129150001	129300000	185	0.00021973
1	129225001	129375000	558	0.000728758
1	129300001	129450000	657	0.000849561
1	129375001	129525000	433	0.000436249
1	129450001	129600000	270	0.000167661
1	129525001	129675000	326	0.000191327
1	129600001	129750000	397	0.000248929
1	129675001	129825000	341	0.000282724
1	129750001	129900000	279	0.0003078
1	129825001	129975000	358	0.000437543
1	129900001	130050000	389	0.000422196
1	129975001	130125000	299	0.00033582
1	130050001	130200000	304	0.000359875
1	130125001	130275000	311	0.000296623
1	130200001	130350000	461	0.000353508
1	130275001	130425000	519	0.00043356
1	130350001	130500000	654	0.000675497
1	130425001	130575000	758	0.000828374
1	130500001	130650000	687	0.000837895
1	130575001	130725000	909	0.00114201
1	130650001	130800000	1003	0.00135798
1	130725001	130875000	930	0.00136828
1	130800001	130950000	660	0.000982639
1	130875001	131025000	410	0.000560467
1	130950001	131100000	894	0.00113562
1	131025001	131175000	1214	0.00162676
1	131100001	131250000	722	0.000985625
1	131175001	131325000	238	0.000271356
1	131250001	131400000	720	0.000831077
1	131325001	131475000	1311	0.00161379
1	131400001	131550000	1120	0.00140246
1	131475001	131625000	978	0.00113981
1	131550001	131700000	1256	0.00164532
1	131625001	131775000	1380	0.00196427
1	131700001	131850000	1364	0.00196267
1	131775001	131925000	1394	0.00202108
1	131850001	132000000	1142	0.001579
1	131925001	132075000	664	0.000832091
1	132000001	132150000	1019	0.00107361
1	132075001	132225000	1611	0.00191487
1	132150001	132300000	1528	0.00191566
1	132225001	132375000	1224	0.00149404
1	132300001	132450000	1098	0.00143184
1	132375001	132525000	1114	0.00147867
1	132450001	132600000	953	0.00132033
1	132525001	132675000	1226	0.00160893
1	132600001	132750000	1300	0.0015484
1	132675001	132825000	1072	0.0011985
1	132750001	132900000	1046	0.00118152
1	132825001	132975000	543	0.000597505
1	132900001	133050000	674	0.000594042
1	132975001	133125000	1008	0.000941721
1	133050001	133200000	718	0.000762837
1	133125001	133275000	938	0.00105936
1	133200001	133350000	866	0.00101753
1	133275001	133425000	862	0.000735948
1	133350001	133500000	1097	0.000796514
1	133425001	133575000	1334	0.00135845
1	133500001	133650000	1154	0.00133295
1	133575001	133725000	1058	0.00117034
1	133650001	133800000	1266	0.00140505
1	133725001	133875000	824	0.000976862
1	133800001	133950000	299	0.000353864
1	133875001	134025000	639	0.000847644
1	133950001	134100000	1143	0.00139316
1	134025001	134175000	1059	0.00117768
1	134100001	134250000	1253	0.00162452
1	134175001	134325000	1520	0.00201215
1	134250001	134400000	1421	0.00161687
1	134325001	134475000	1325	0.00133675
1	134400001	134550000	1304	0.00139854
1	134475001	134625000	1129	0.00108678
1	134550001	134700000	903	0.000847819
1	134625001	134775000	1035	0.00123739
1	134700001	134850000	1241	0.0015172
1	134775001	134925000	1218	0.00158378
1	134850001	135000000	1496	0.00192583
1	134925001	135075000	1705	0.0022784
1	135000001	135150000	1276	0.00154113
1	135075001	135225000	1065	0.00115559
1	135150001	135300000	1127	0.00142981
1	135225001	135375000	1010	0.00123315
1	135300001	135450000	1079	0.00147245
1	135375001	135525000	1275	0.00184292
1	135450001	135600000	1419	0.0018656
1	135525001	135675000	1333	0.00161071
1	135600001	135750000	987	0.00116382
1	135675001	135825000	1045	0.00120424
1	135750001	135900000	1333	0.00158662
1	135825001	135975000	1242	0.00156683
1	135900001	136050000	1166	0.00155346
1	135975001	136125000	1154	0.00149651
1	136050001	136200000	1027	0.00124222
1	136125001	136275000	861	0.000981316
1	136200001	136350000	1285	0.00161848
1	136275001	136425000	1539	0.00199136
1	136350001	136500000	1183	0.00141545
1	136425001	136575000	1436	0.00182966
1	136500001	136650000	1681	0.00205597
1	136575001	136725000	802	0.000833111
1	136650001	136800000	56	3.88466e-05
1	136725001	136875000	582	0.000549432
1	136800001	136950000	1110	0.000941895
1	136875001	137025000	945	0.000848262
1	136950001	137100000	866	0.000905917
1	137025001	137175000	588	0.000604305
1	137100001	137250000	264	0.00033927
1	137175001	137325000	641	0.000806208
1	137250001	137400000	1004	0.000930558
1	137325001	137475000	759	0.000632069
1	137400001	137550000	701	0.000750212
1	137475001	137625000	882	0.00102305
1	137550001	137700000	813	0.00106711
1	137625001	137775000	741	0.000774917
1	137700001	137850000	589	0.000419074
1	137775001	137925000	558	0.000423088
1	137850001	138000000	837	0.000867351
1	137925001	138075000	1016	0.0013005
1	138000001	138150000	1156	0.00157676
1	138075001	138225000	1436	0.00171641
1	138150001	138300000	1506	0.00165672
1	138225001	138375000	1389	0.00156385
1	138300001	138450000	868	0.000922634
1	138375001	138525000	1015	0.00108996
1	138450001	138600000	975	0.00109025
1	138525001	138675000	339	0.000329423
1	138600001	138750000	1142	0.0013492
1	138675001	138825000	1554	0.0018471
1	138750001	138900000	1333	0.00157302
1	138825001	138975000	1514	0.00172322
1	138900001	139050000	1491	0.00157739
1	138975001	139125000	1331	0.00161689
1	139050001	139200000	1455	0.00193551
1	139125001	139275000	1629	0.00184662
1	139200001	139350000	1331	0.00132194
1	139275001	139425000	851	0.000843745
1	139350001	139500000	519	0.000469728
1	139425001	139575000	411	0.000412833
1	139500001	139650000	641	0.000881489
1	139575001	139725000	988	0.00129437
1	139650001	139800000	1134	0.00131525
1	139725001	139875000	1508	0.00162079
1	139800001	139950000	1541	0.00179114
1	139875001	140025000	968	0.00127405
1	139950001	140100000	623	0.00066275
1	140025001	140175000	749	0.000671572
1	140100001	140250000	524	0.000472436
1	140175001	140325000	102	5.17e-05
1	140250001	140400000	978	0.00104589
1	140325001	140475000	1532	0.00158655
1	140400001	140550000	858	0.000857288
1	140475001	140625000	363	0.00038094
1	140550001	140700000	814	0.000788403
1	140625001	140775000	1341	0.00148818
1	140700001	140850000	1206	0.00135259
1	140775001	140925000	1079	0.0011579
1	140850001	141000000	1569	0.00186982
1	140925001	141075000	1738	0.00200919
1	141000001	141150000	1613	0.00170749
1	141075001	141225000	1471	0.00166878
1	141150001	141300000	1321	0.00136856
1	141225001	141375000	1521	0.00145751
1	141300001	141450000	1426	0.00147829
1	141375001	141525000	1036	0.000952916
1	141450001	141600000	1121	0.00117982
1	141525001	141675000	1097	0.00127713
1	141600001	141750000	384	0.000398135
1	141675001	141825000	107	8.50568e-05
1	141750001	141900000	84	7.05901e-05
1	141825001	141975000	77	6.30807e-05
1	141900001	142050000	555	0.000522148
1	141975001	142125000	1594	0.00182108
1	142050001	142200000	1812	0.00186282
1	142125001	142275000	1938	0.00181878
1	142200001	142350000	2475	0.00271268
1	142275001	142425000	1947	0.00244032
1	142350001	142500000	1481	0.0021252
1	142425001	142575000	818	0.00111423
1	142500001	142650000	116	0.000126011
1	142575001	142725000	293	0.000340234
1	142650001	142800000	394	0.00042817
1	142725001	142875000	618	0.000657808
1	142800001	142950000	486	0.000496942
1	142875001	143025000	826	0.00104986
1	142950001	143100000	1136	0.00157925
1	143025001	143175000	398	0.000588048
1	143100001	143250000	68	6.33783e-05
1	143175001	143325000	330	0.000473875
1	143250001	143400000	422	0.00059537
1	143325001	143475000	152	0.000170254
1	143400001	143550000	363	0.000410549
1	143475001	143625000	639	0.000721705
1	143550001	143700000	876	0.000861768
1	143625001	143775000	1361	0.0014452
1	143700001	143850000	1180	0.00149054
1	143775001	143925000	1063	0.00158719
1	143850001	144000000	988	0.00144132
1	143925001	144075000	602	0.000805429
1	144000001	144150000	1171	0.00133134
1	144075001	144225000	1981	0.0023959
1	144150001	144300000	1226	0.00159246
1	144225001	144375000	206	0.00021459
1	144300001	144450000	114	9.53663e-05
1	144375001	144525000	479	0.000485922
1	144450001	144600000	797	0.000873836
1	144525001	144675000	1209	0.00166029
1	144600001	144750000	1455	0.00182198
1	144675001	144825000	914	0.000860369
1	144750001	144900000	1120	0.00114918
1	144825001	144975000	1414	0.00147242
1	144900001	145050000	687	0.0006912
1	144975001	145125000	242	0.000263789
1	145050001	145200000	273	0.00032693
1	145125001	145275000	843	0.0010885
1	145200001	145350000	1108	0.00127945
1	145275001	145425000	992	0.00111613
1	145350001	145500000	831	0.0010276
1	145425001	145575000	760	0.000806907
1	145500001	145650000	1027	0.00105053
1	145575001	145725000	533	0.000542379
1	145650001	145800000	508	0.000491316
1	145725001	145875000	1109	0.00118854
1	145800001	145950000	1409	0.00154705
1	145875001	146025000	1601	0.00174369
1	145950001	146100000	1240	0.00128987
1	146025001	146175000	1048	0.000976592
1	146100001	146250000	1027	0.00107271
1	146175001	146325000	1079	0.00112714
1	146250001	146400000	1535	0.00139903
1	146325001	146475000	1633	0.00155167
1	146400001	146550000	1485	0.00153841
1	146475001	146625000	1053	0.000990959
1	146550001	146700000	1015	0.00090412
1	146625001	146775000	1186	0.0011381
1	146700001	146850000	1231	0.00126213
1	146775001	146925000	1169	0.00123945
1	146850001	147000000	525	0.000533425
1	146925001	147075000	224	0.000239104
1	147000001	147150000	974	0.000998041
1	147075001	147225000	1147	0.00123752
1	147150001	147300000	754	0.000900533
1	147225001	147375000	848	0.00108138
1	147300001	147450000	1132	0.00149886
1	147375001	147525000	1137	0.00146171
1	147450001	147600000	600	0.000769925
1	147525001	147675000	184	0.000214266
1	147600001	147750000	386	0.000380201
1	147675001	147825000	1108	0.00125414
1	147750001	147900000	749	0.000886275
1	147825001	147975000	407	0.000442775
1	147900001	148050000	1173	0.00118455
1	147975001	148125000	1588	0.00156579
1	148050001	148200000	1720	0.00180918
1	148125001	148275000	1854	0.00196048
1	148200001	148350000	1674	0.00172316
1	148275001	148425000	1443	0.00153499
1	148350001	148500000	1297	0.00131735
1	148425001	148575000	740	0.000710078
1	148500001	148650000	1096	0.00112778
1	148575001	148725000	1714	0.00187238
1	148650001	148800000	854	0.000972565
1	148725001	148875000	273	0.000296867
1	148800001	148950000	262	0.000292912
1	148875001	149025000	851	0.000938809
1	148950001	149100000	1959	0.00228217
1	149025001	149175000	2084	0.00256903
1	149100001	149250000	1878	0.00211207
1	149175001	149325000	1763	0.00178224
1	149250001	149400000	1997	0.00222878
1	149325001	149475000	2273	0.00264866
1	149400001	149550000	1757	0.00191599
1	149475001	149625000	714	0.000668879
1	149550001	149700000	1110	0.00133365
1	149625001	149775000	2085	0.00249273
1	149700001	149850000	1737	0.00195257
1	149775001	149925000	1283	0.0013661
[truncated: 35,468 more rows]

## Sheet: Table S7
Table S7.Nucleotide diversity (PI) values of WS populations
CHROM	BIN_START	BIN_END	N_VARIANTS	PI
1	1	150000	1763	0.00341457
1	75001	225000	1488	0.00290661
1	150001	300000	1370	0.00257441
1	225001	375000	1402	0.00267486
1	300001	450000	1501	0.00286021
1	375001	525000	1343	0.00244337
1	450001	600000	1466	0.00270045
1	525001	675000	1524	0.00276994
1	600001	750000	1426	0.00253546
1	675001	825000	1914	0.00362051
1	750001	900000	2006	0.00382721
1	825001	975000	2051	0.00409481
1	900001	1050000	1920	0.00385515
1	975001	1125000	1580	0.00305661
1	1050001	1200000	2189	0.00459634
1	1125001	1275000	2119	0.00449531
1	1200001	1350000	1999	0.00372077
1	1275001	1425000	3001	0.00539397
1	1350001	1500000	2931	0.00559592
1	1425001	1575000	2677	0.00546245
1	1500001	1650000	3295	0.00684474
1	1575001	1725000	3080	0.00618238
1	1650001	1800000	1850	0.00358918
1	1725001	1875000	1732	0.00339652
1	1800001	1950000	2230	0.00410105
1	1875001	2025000	2319	0.00426738
1	1950001	2100000	2248	0.00425787
1	2025001	2175000	2002	0.00379882
1	2100001	2250000	2000	0.003847
1	2175001	2325000	2275	0.00456336
1	2250001	2400000	2389	0.00482574
1	2325001	2475000	2078	0.00407143
1	2400001	2550000	2095	0.00411702
1	2475001	2625000	2376	0.00475099
1	2550001	2700000	2393	0.00458877
1	2625001	2775000	2095	0.00385202
1	2700001	2850000	2068	0.00374535
1	2775001	2925000	2296	0.00420158
1	2850001	3000000	2270	0.00435333
1	2925001	3075000	1186	0.00228812
1	3000001	3150000	970	0.00181755
1	3075001	3225000	1715	0.00319674
1	3150001	3300000	1871	0.00343544
1	3225001	3375000	2029	0.00388007
1	3300001	3450000	2131	0.00417184
1	3375001	3525000	2583	0.00503836
1	3450001	3600000	3388	0.00689141
1	3525001	3675000	3099	0.00652384
1	3600001	3750000	2088	0.00435227
1	3675001	3825000	2008	0.004118
1	3750001	3900000	2277	0.00454555
1	3825001	3975000	2638	0.00529267
1	3900001	4050000	2601	0.00528342
1	3975001	4125000	2308	0.00451921
1	4050001	4200000	2454	0.00447061
1	4125001	4275000	2786	0.00525183
1	4200001	4350000	2140	0.00418416
1	4275001	4425000	2145	0.00401254
1	4350001	4500000	2855	0.00535412
1	4425001	4575000	2917	0.00564095
1	4500001	4650000	2574	0.00512963
1	4575001	4725000	2123	0.00410868
1	4650001	4800000	2439	0.00471818
1	4725001	4875000	2364	0.00447967
1	4800001	4950000	2242	0.00418166
1	4875001	5025000	2133	0.00406291
1	4950001	5100000	2034	0.00395812
1	5025001	5175000	2237	0.00462695
1	5100001	5250000	2331	0.00476889
1	5175001	5325000	2133	0.00395583
1	5250001	5400000	2026	0.00379172
1	5325001	5475000	2137	0.00415943
1	5400001	5550000	2121	0.0041287
1	5475001	5625000	2241	0.00441563
1	5550001	5700000	2550	0.00500507
1	5625001	5775000	2863	0.00578468
1	5700001	5850000	2965	0.00616778
1	5775001	5925000	2857	0.00585809
1	5850001	6000000	2558	0.0050783
1	5925001	6075000	2176	0.00396828
1	6000001	6150000	2283	0.00424426
1	6075001	6225000	2690	0.00560109
1	6150001	6300000	3095	0.00663931
1	6225001	6375000	3289	0.00698339
1	6300001	6450000	2151	0.00464826
1	6375001	6525000	2168	0.00468271
1	6450001	6600000	2817	0.00576248
1	6525001	6675000	2614	0.00529514
1	6600001	6750000	2723	0.00552042
1	6675001	6825000	2644	0.00524755
1	6750001	6900000	2669	0.00531643
1	6825001	6975000	2204	0.00440325
1	6900001	7050000	1707	0.00314479
1	6975001	7125000	1750	0.00327814
1	7050001	7200000	2431	0.00482967
1	7125001	7275000	2896	0.0055927
1	7200001	7350000	2703	0.00523427
1	7275001	7425000	2291	0.00463729
1	7350001	7500000	2428	0.00513121
1	7425001	7575000	2152	0.00466259
1	7500001	7650000	1541	0.00337674
1	7575001	7725000	983	0.00206389
1	7650001	7800000	668	0.00131887
1	7725001	7875000	922	0.0018274
1	7800001	7950000	1128	0.00229237
1	7875001	8025000	1856	0.00387726
1	7950001	8100000	1838	0.0036622
1	8025001	8175000	1733	0.00321026
1	8100001	8250000	2266	0.00449827
1	8175001	8325000	1997	0.00405814
1	8250001	8400000	1329	0.00251266
1	8325001	8475000	1481	0.00278971
1	8400001	8550000	1215	0.00228854
1	8475001	8625000	1510	0.00273719
1	8550001	8700000	2487	0.00494617
1	8625001	8775000	2624	0.00561683
1	8700001	8850000	2589	0.00576039
1	8775001	8925000	2655	0.00580797
1	8850001	9000000	2524	0.00531031
1	8925001	9075000	2268	0.00450587
1	9000001	9150000	2287	0.0045115
1	9075001	9225000	1950	0.00399396
1	9150001	9300000	1993	0.00414498
1	9225001	9375000	2117	0.00444242
1	9300001	9450000	1817	0.00359532
1	9375001	9525000	1534	0.00288669
1	9450001	9600000	876	0.00167789
1	9525001	9675000	857	0.00170735
1	9600001	9750000	1836	0.00381925
1	9675001	9825000	2118	0.00433122
1	9750001	9900000	1729	0.0033139
1	9825001	9975000	2070	0.00407926
1	9900001	10050000	2427	0.00490523
1	9975001	10125000	2132	0.00403394
1	10050001	10200000	2180	0.00425152
1	10125001	10275000	2032	0.00416839
1	10200001	10350000	1686	0.00332645
1	10275001	10425000	1558	0.00307486
1	10350001	10500000	1344	0.00255518
1	10425001	10575000	1163	0.00227097
1	10500001	10650000	911	0.00194002
1	10575001	10725000	560	0.00117413
1	10650001	10800000	527	0.00102081
1	10725001	10875000	1141	0.00237753
1	10800001	10950000	1386	0.00279881
1	10875001	11025000	1635	0.00314396
1	10950001	11100000	1763	0.00346305
1	11025001	11175000	1520	0.00295458
1	11100001	11250000	1167	0.0021509
1	11175001	11325000	925	0.00159671
1	11250001	11400000	878	0.00140228
1	11325001	11475000	1056	0.00188791
1	11400001	11550000	1195	0.00225578
1	11475001	11625000	1167	0.00209709
1	11550001	11700000	1616	0.00302034
1	11625001	11775000	2074	0.00412882
1	11700001	11850000	2027	0.00396877
1	11775001	11925000	1919	0.00358847
1	11850001	12000000	1932	0.00366459
1	11925001	12075000	1896	0.00376477
1	12000001	12150000	1902	0.00401188
1	12075001	12225000	1955	0.0040794
1	12150001	12300000	1855	0.003842
1	12225001	12375000	1878	0.00408384
1	12300001	12450000	1970	0.00405012
1	12375001	12525000	1823	0.00354834
1	12450001	12600000	1118	0.00217496
1	12525001	12675000	645	0.00124379
1	12600001	12750000	1487	0.00301948
1	12675001	12825000	1626	0.00317768
1	12750001	12900000	1227	0.00236156
1	12825001	12975000	1571	0.00325578
1	12900001	13050000	1861	0.00389959
1	12975001	13125000	1456	0.00286218
1	13050001	13200000	1151	0.00221313
1	13125001	13275000	831	0.00161844
1	13200001	13350000	377	0.000649665
1	13275001	13425000	861	0.0016116
1	13350001	13500000	1453	0.00281719
1	13425001	13575000	1633	0.00317038
1	13500001	13650000	1737	0.00332353
1	13575001	13725000	1954	0.00388274
1	13650001	13800000	1937	0.00384213
1	13725001	13875000	1696	0.00326957
1	13800001	13950000	1857	0.00370521
1	13875001	14025000	1971	0.0038929
1	13950001	14100000	2086	0.00420507
1	14025001	14175000	1998	0.00408242
1	14100001	14250000	2023	0.00412077
1	14175001	14325000	1968	0.00399189
1	14250001	14400000	1333	0.0025739
1	14325001	14475000	1389	0.00269029
1	14400001	14550000	1775	0.00363526
1	14475001	14625000	1480	0.00316273
1	14550001	14700000	1080	0.00215043
1	14625001	14775000	1153	0.00228482
1	14700001	14850000	1368	0.00283886
1	14775001	14925000	1624	0.00320506
1	14850001	15000000	1499	0.00295851
1	14925001	15075000	1223	0.00227969
1	15000001	15150000	1308	0.00238804
1	15075001	15225000	1427	0.00267317
1	15150001	15300000	1243	0.00229885
1	15225001	15375000	1108	0.00217728
1	15300001	15450000	1271	0.00256909
1	15375001	15525000	1439	0.00296661
1	15450001	15600000	1594	0.00320883
1	15525001	15675000	1763	0.0034985
1	15600001	15750000	1713	0.00333763
1	15675001	15825000	1447	0.00264174
1	15750001	15900000	1209	0.00218297
1	15825001	15975000	1283	0.00246276
1	15900001	16050000	1481	0.00277598
1	15975001	16125000	1449	0.00258498
1	16050001	16200000	1311	0.00262853
1	16125001	16275000	1359	0.0029365
1	16200001	16350000	1136	0.00220556
1	16275001	16425000	1208	0.00216834
1	16350001	16500000	1488	0.00278186
1	16425001	16575000	1270	0.00238096
1	16500001	16650000	1285	0.00242114
1	16575001	16725000	1255	0.00239606
1	16650001	16800000	1414	0.00282028
1	16725001	16875000	1706	0.0035306
1	16800001	16950000	1677	0.00338467
1	16875001	17025000	1769	0.00348431
1	16950001	17100000	1868	0.00371905
1	17025001	17175000	1893	0.00386075
1	17100001	17250000	1850	0.00357215
1	17175001	17325000	1606	0.00301812
1	17250001	17400000	1226	0.00246573
1	17325001	17475000	1073	0.00216768
1	17400001	17550000	1684	0.00360146
1	17475001	17625000	2159	0.00468161
1	17550001	17700000	2439	0.00519391
1	17625001	17775000	2353	0.00508599
1	17700001	17850000	1721	0.00345449
1	17775001	17925000	1705	0.00320281
1	17850001	18000000	1659	0.00323564
1	17925001	18075000	1784	0.00361931
1	18000001	18150000	2182	0.00450498
1	18075001	18225000	2545	0.00509101
1	18150001	18300000	2946	0.00603196
1	18225001	18375000	2827	0.00593288
1	18300001	18450000	2498	0.00508329
1	18375001	18525000	2308	0.00484333
1	18450001	18600000	1927	0.00410067
1	18525001	18675000	1206	0.00228531
1	18600001	18750000	969	0.00173464
1	18675001	18825000	1330	0.00248614
1	18750001	18900000	1495	0.00283911
1	18825001	18975000	1604	0.00319335
1	18900001	19050000	1934	0.00395524
1	18975001	19125000	1817	0.00366871
1	19050001	19200000	1588	0.00328378
1	19125001	19275000	1228	0.00252256
1	19200001	19350000	1154	0.0023784
1	19275001	19425000	1385	0.00272654
1	19350001	19500000	1240	0.0022085
1	19425001	19575000	1206	0.00244253
1	19500001	19650000	1376	0.00282773
1	19575001	19725000	1598	0.00307927
1	19650001	19800000	1824	0.00363669
1	19725001	19875000	1678	0.0033832
1	19800001	19950000	1136	0.00212617
1	19875001	20025000	861	0.00147424
1	19950001	20100000	527	0.00088709
1	20025001	20175000	633	0.000985568
1	20100001	20250000	1176	0.00223378
1	20175001	20325000	1048	0.00208834
1	20250001	20400000	815	0.00130205
1	20325001	20475000	1263	0.002214
1	20400001	20550000	1565	0.00285618
1	20475001	20625000	1482	0.00287064
1	20550001	20700000	1084	0.00214591
1	20625001	20775000	1031	0.00182422
1	20700001	20850000	1241	0.00228066
1	20775001	20925000	874	0.00173611
1	20850001	21000000	818	0.00155926
1	20925001	21075000	1274	0.00248439
1	21000001	21150000	1461	0.00292258
1	21075001	21225000	1540	0.00300663
1	21150001	21300000	1394	0.00277481
1	21225001	21375000	950	0.00181004
1	21300001	21450000	1110	0.00213434
1	21375001	21525000	1162	0.00224901
1	21450001	21600000	673	0.00120107
1	21525001	21675000	616	0.00107933
1	21600001	21750000	928	0.00178193
1	21675001	21825000	1105	0.00226701
1	21750001	21900000	1215	0.00240725
1	21825001	21975000	1264	0.00245547
1	21900001	22050000	1349	0.00262117
1	21975001	22125000	1542	0.00304839
1	22050001	22200000	1836	0.00374423
1	22125001	22275000	1867	0.00372167
1	22200001	22350000	1610	0.00310047
1	22275001	22425000	1284	0.00257068
1	22350001	22500000	1038	0.0021597
1	22425001	22575000	1138	0.00242118
1	22500001	22650000	1224	0.00257386
1	22575001	22725000	1201	0.00233261
1	22650001	22800000	1413	0.00277504
1	22725001	22875000	1549	0.00316663
1	22800001	22950000	1685	0.00344349
1	22875001	23025000	1611	0.00319802
1	22950001	23100000	1606	0.00330384
1	23025001	23175000	1715	0.00360873
1	23100001	23250000	1811	0.00362281
1	23175001	23325000	2190	0.00454712
1	23250001	23400000	2589	0.00571458
1	23325001	23475000	2715	0.00562672
1	23400001	23550000	2163	0.00421165
1	23475001	23625000	1777	0.00384314
1	23550001	23700000	1986	0.00453815
1	23625001	23775000	2182	0.00456057
1	23700001	23850000	2267	0.00452133
1	23775001	23925000	2048	0.00423386
1	23850001	24000000	1790	0.00363238
1	23925001	24075000	1726	0.00315118
1	24000001	24150000	1705	0.00291258
1	24075001	24225000	1615	0.00296563
1	24150001	24300000	1599	0.00301329
1	24225001	24375000	1628	0.00320622
1	24300001	24450000	1283	0.0024336
1	24375001	24525000	764	0.00121546
1	24450001	24600000	548	0.00107096
1	24525001	24675000	347	0.000765279
1	24600001	24750000	504	0.000920114
1	24675001	24825000	783	0.0013456
1	24750001	24900000	582	0.00103955
1	24825001	24975000	724	0.00154246
1	24900001	25050000	469	0.00100847
1	24975001	25125000	35	7.10635e-05
1	25050001	25200000	380	0.000716913
1	25125001	25275000	1163	0.00200362
1	25200001	25350000	1990	0.0036958
1	25275001	25425000	2858	0.00537626
1	25350001	25500000	3848	0.00725653
1	25425001	25575000	4816	0.00878981
1	25500001	25650000	3206	0.0054764
1	25575001	25725000	989	0.00153317
1	25650001	25800000	904	0.00137611
1	25725001	25875000	1127	0.00230741
1	25800001	25950000	956	0.00205655
1	25875001	26025000	640	0.00105035
1	25950001	26100000	937	0.0016698
1	26025001	26175000	1237	0.00231777
1	26100001	26250000	1253	0.00242263
1	26175001	26325000	1087	0.00207897
1	26250001	26400000	937	0.00167486
1	26325001	26475000	843	0.00154589
1	26400001	26550000	892	0.00182109
1	26475001	26625000	886	0.0017274
1	26550001	26700000	858	0.00143046
1	26625001	26775000	885	0.00169157
1	26700001	26850000	840	0.00174515
1	26775001	26925000	857	0.00170571
1	26850001	27000000	855	0.00179944
1	26925001	27075000	852	0.00177043
1	27000001	27150000	700	0.0012047
1	27075001	27225000	937	0.00164417
1	27150001	27300000	1090	0.00186352
1	27225001	27375000	1026	0.00198373
1	27300001	27450000	1080	0.00234811
1	27375001	27525000	1028	0.0021395
1	27450001	27600000	986	0.00192167
1	27525001	27675000	1059	0.00195587
1	27600001	27750000	1106	0.0022261
1	27675001	27825000	678	0.00132615
1	27750001	27900000	398	0.00060642
1	27825001	27975000	448	0.000641388
1	27900001	28050000	810	0.00143934
1	27975001	28125000	1006	0.00186318
1	28050001	28200000	1099	0.00188963
1	28125001	28275000	1313	0.00229724
1	28200001	28350000	1129	0.00223639
1	28275001	28425000	902	0.00190425
1	28350001	28500000	607	0.00118509
1	28425001	28575000	383	0.000618955
1	28500001	28650000	764	0.00112155
1	28575001	28725000	1187	0.00197526
1	28650001	28800000	1222	0.00219086
1	28725001	28875000	1172	0.00224878
1	28800001	28950000	1428	0.00287547
1	28875001	29025000	1963	0.00409248
1	28950001	29100000	1617	0.00340699
1	29025001	29175000	1450	0.00297561
1	29100001	29250000	1644	0.0030997
1	29175001	29325000	1454	0.00264585
1	29250001	29400000	996	0.00199179
1	29325001	29475000	829	0.00160635
1	29400001	29550000	1362	0.00278019
1	29475001	29625000	1462	0.00292786
1	29550001	29700000	1284	0.00244089
1	29625001	29775000	1244	0.00242822
1	29700001	29850000	1290	0.00251139
1	29775001	29925000	1108	0.00213351
1	29850001	30000000	1251	0.00249963
1	29925001	30075000	1682	0.00340801
1	30000001	30150000	1616	0.00323554
1	30075001	30225000	1381	0.0026573
1	30150001	30300000	1569	0.00301449
1	30225001	30375000	1570	0.00308895
1	30300001	30450000	1125	0.00209929
1	30375001	30525000	955	0.00170191
1	30450001	30600000	1160	0.00211739
1	30525001	30675000	1380	0.00253513
1	30600001	30750000	1886	0.00361428
1	30675001	30825000	2374	0.00469757
1	30750001	30900000	1896	0.00388213
1	30825001	30975000	1494	0.00298232
1	30900001	31050000	1847	0.00357261
1	30975001	31125000	1665	0.00312875
1	31050001	31200000	1297	0.00250649
1	31125001	31275000	1707	0.00334043
1	31200001	31350000	1944	0.00371714
1	31275001	31425000	1907	0.00390678
1	31350001	31500000	1900	0.0040824
1	31425001	31575000	1681	0.00337653
1	31500001	31650000	1383	0.00250667
1	31575001	31725000	1453	0.00276382
1	31650001	31800000	1657	0.0031686
1	31725001	31875000	1920	0.00382683
1	31800001	31950000	1913	0.00396136
1	31875001	32025000	1686	0.00323265
1	31950001	32100000	1716	0.00302126
1	32025001	32175000	1803	0.00324285
1	32100001	32250000	2010	0.00367781
1	32175001	32325000	2003	0.00383325
1	32250001	32400000	1651	0.00329368
1	32325001	32475000	1731	0.00332056
1	32400001	32550000	1907	0.00360785
1	32475001	32625000	1708	0.0031733
1	32550001	32700000	1460	0.00273447
1	32625001	32775000	1433	0.00283756
1	32700001	32850000	1985	0.00396231
1	32775001	32925000	2167	0.00421382
1	32850001	33000000	2393	0.00476121
1	32925001	33075000	2502	0.00497766
1	33000001	33150000	2300	0.00443222
1	33075001	33225000	2219	0.00450793
1	33150001	33300000	2021	0.00425373
1	33225001	33375000	2049	0.004157
1	33300001	33450000	2077	0.00393964
1	33375001	33525000	2273	0.00432821
1	33450001	33600000	2286	0.00443223
1	33525001	33675000	2250	0.00448258
1	33600001	33750000	2212	0.00450905
1	33675001	33825000	2026	0.00399101
1	33750001	33900000	1946	0.00378531
1	33825001	33975000	2075	0.00413392
1	33900001	34050000	2326	0.00472386
1	33975001	34125000	2368	0.00470856
1	34050001	34200000	2084	0.00420765
1	34125001	34275000	1957	0.00400076
1	34200001	34350000	2013	0.00397323
1	34275001	34425000	2290	0.0046269
1	34350001	34500000	2234	0.00446103
1	34425001	34575000	1849	0.00344736
1	34500001	34650000	2035	0.003986
1	34575001	34725000	2423	0.0049835
1	34650001	34800000	2421	0.00486362
1	34725001	34875000	2133	0.00424595
1	34800001	34950000	2009	0.00407595
1	34875001	35025000	1580	0.00316007
1	34950001	35100000	1393	0.00275008
1	35025001	35175000	1302	0.00257229
1	35100001	35250000	1231	0.002459
1	35175001	35325000	1538	0.00291018
1	35250001	35400000	1735	0.00322519
1	35325001	35475000	1876	0.00366219
1	35400001	35550000	1674	0.00310421
1	35475001	35625000	1368	0.00243791
1	35550001	35700000	2054	0.0040766
1	35625001	35775000	1894	0.00384005
1	35700001	35850000	626	0.001223
1	35775001	35925000	853	0.00161028
1	35850001	36000000	1631	0.0031938
1	35925001	36075000	1708	0.00321531
1	36000001	36150000	1462	0.00253254
1	36075001	36225000	1641	0.00316589
1	36150001	36300000	1453	0.00290697
1	36225001	36375000	1136	0.0021855
1	36300001	36450000	1336	0.00258491
1	36375001	36525000	1668	0.0031788
1	36450001	36600000	2034	0.00411315
1	36525001	36675000	2320	0.00538576
1	36600001	36750000	1953	0.0043397
1	36675001	36825000	1542	0.00306708
1	36750001	36900000	1844	0.00374909
1	36825001	36975000	2125	0.0043637
1	36900001	37050000	2217	0.00452812
1	36975001	37125000	2010	0.00391298
1	37050001	37200000	1857	0.00379746
1	37125001	37275000	1928	0.00387873
1	37200001	37350000	1839	0.00368331
1	37275001	37425000	924	0.00187195
1	37350001	37500000	338	0.000449584
1	37425001	37575000	1202	0.00205682
1	37500001	37650000	2126	0.00408681
1	37575001	37725000	1888	0.00327468
1	37650001	37800000	1929	0.00296508
1	37725001	37875000	2321	0.00419626
1	37800001	37950000	2043	0.00395856
1	37875001	38025000	1562	0.00285374
1	37950001	38100000	1671	0.0031452
1	38025001	38175000	1650	0.00311916
1	38100001	38250000	1038	0.00188197
1	38175001	38325000	898	0.00165742
1	38250001	38400000	937	0.00165987
1	38325001	38475000	1051	0.0020122
1	38400001	38550000	1423	0.00274513
1	38475001	38625000	1594	0.00313034
1	38550001	38700000	1577	0.00320815
1	38625001	38775000	1649	0.00322836
1	38700001	38850000	1684	0.00320852
1	38775001	38925000	1558	0.00303844
1	38850001	39000000	1601	0.00315246
1	38925001	39075000	1820	0.00368765
1	39000001	39150000	2192	0.00448252
1	39075001	39225000	2278	0.00455356
1	39150001	39300000	1126	0.00228117
1	39225001	39375000	1340	0.00257629
1	39300001	39450000	1773	0.00323386
1	39375001	39525000	1109	0.00181331
1	39450001	39600000	1853	0.00317546
1	39525001	39675000	2197	0.00397446
1	39600001	39750000	1654	0.00329517
1	39675001	39825000	1631	0.00331624
1	39750001	39900000	1479	0.00287286
1	39825001	39975000	1066	0.00199264
1	39900001	40050000	1408	0.00260963
1	39975001	40125000	1764	0.00356518
1	40050001	40200000	1593	0.00336639
1	40125001	40275000	1627	0.00330693
1	40200001	40350000	1667	0.00342077
1	40275001	40425000	1704	0.00354302
1	40350001	40500000	1931	0.00402831
1	40425001	40575000	1860	0.00366569
1	40500001	40650000	1665	0.0031468
1	40575001	40725000	1689	0.00346828
1	40650001	40800000	1518	0.00292229
1	40725001	40875000	1395	0.00251601
1	40800001	40950000	1581	0.00307306
1	40875001	41025000	1507	0.00293167
1	40950001	41100000	1199	0.00229149
1	41025001	41175000	1330	0.00223959
1	41100001	41250000	1344	0.0022969
1	41175001	41325000	1424	0.00267776
1	41250001	41400000	1742	0.00326557
1	41325001	41475000	1970	0.00388739
1	41400001	41550000	1824	0.00366327
1	41475001	41625000	1469	0.00301291
1	41550001	41700000	1603	0.00326978
1	41625001	41775000	1657	0.00335137
1	41700001	41850000	1740	0.00364577
1	41775001	41925000	1730	0.00352484
1	41850001	42000000	1275	0.00245716
1	41925001	42075000	1198	0.00234214
1	42000001	42150000	1513	0.00307331
1	42075001	42225000	1533	0.00309189
1	42150001	42300000	1677	0.0034339
1	42225001	42375000	1622	0.00320882
1	42300001	42450000	1284	0.00256275
1	42375001	42525000	1455	0.00311394
1	42450001	42600000	1695	0.00356137
1	42525001	42675000	1556	0.00320506
1	42600001	42750000	1457	0.00286206
1	42675001	42825000	1528	0.00314235
1	42750001	42900000	1460	0.00320555
1	42825001	42975000	1486	0.00300859
1	42900001	43050000	1687	0.0034436
1	42975001	43125000	1639	0.00323816
1	43050001	43200000	1535	0.00289597
1	43125001	43275000	1265	0.00259905
1	43200001	43350000	598	0.00126222
1	43275001	43425000	180	0.000352119
1	43350001	43500000	239	0.000394959
1	43425001	43575000	550	0.00103766
1	43500001	43650000	1395	0.00297923
1	43575001	43725000	1804	0.00377067
1	43650001	43800000	1725	0.00332309
1	43725001	43875000	2034	0.00398919
1	43800001	43950000	2284	0.00482635
1	43875001	44025000	2385	0.00503705
1	43950001	44100000	2096	0.00399811
1	44025001	44175000	1778	0.00336197
1	44100001	44250000	1323	0.00265849
1	44175001	44325000	1424	0.00278386
1	44250001	44400000	2092	0.00417162
1	44325001	44475000	1898	0.00382461
1	44400001	44550000	1517	0.00291891
1	44475001	44625000	1744	0.00339181
1	44550001	44700000	1829	0.00358294
1	44625001	44775000	1813	0.0036233
1	44700001	44850000	1237	0.00249697
1	44775001	44925000	953	0.00172969
1	44850001	45000000	1612	0.00308004
1	44925001	45075000	2031	0.00406611
1	45000001	45150000	1936	0.00390969
1	45075001	45225000	1655	0.00324598
1	45150001	45300000	1461	0.00288774
1	45225001	45375000	1643	0.00325467
1	45300001	45450000	1923	0.00370253
1	45375001	45525000	1511	0.00267244
1	45450001	45600000	1214	0.00213243
1	45525001	45675000	1207	0.0023976
1	45600001	45750000	1107	0.00215259
1	45675001	45825000	1263	0.00229015
1	45750001	45900000	1702	0.00311497
1	45825001	45975000	1705	0.00324194
1	45900001	46050000	1708	0.0033324
1	45975001	46125000	1460	0.00273178
1	46050001	46200000	1631	0.00293648
1	46125001	46275000	2228	0.00438819
1	46200001	46350000	1841	0.00354088
1	46275001	46425000	1351	0.00224399
1	46350001	46500000	1593	0.00312485
1	46425001	46575000	1282	0.00257133
1	46500001	46650000	841	0.00154786
1	46575001	46725000	775	0.00147565
1	46650001	46800000	1065	0.00192905
1	46725001	46875000	2014	0.00384088
1	46800001	46950000	2081	0.00403494
1	46875001	47025000	1634	0.00303741
1	46950001	47100000	1594	0.00297728
1	47025001	47175000	1944	0.00371121
1	47100001	47250000	2050	0.00378167
1	47175001	47325000	1947	0.00362851
1	47250001	47400000	1622	0.00304504
1	47325001	47475000	699	0.00123391
1	47400001	47550000	120	0.000173162
1	47475001	47625000	312	0.000512945
1	47550001	47700000	1120	0.00200506
1	47625001	47775000	1702	0.00303404
1	47700001	47850000	1829	0.00342664
1	47775001	47925000	1704	0.00332181
1	47850001	48000000	1734	0.00325103
1	47925001	48075000	1665	0.00318311
1	48000001	48150000	1792	0.003615
1	48075001	48225000	2023	0.00372724
1	48150001	48300000	1853	0.00328232
1	48225001	48375000	1531	0.00292123
1	48300001	48450000	1286	0.00247901
1	48375001	48525000	1434	0.00287282
1	48450001	48600000	1135	0.00221372
1	48525001	48675000	1407	0.00270061
1	48600001	48750000	1802	0.00360923
1	48675001	48825000	1927	0.0039312
1	48750001	48900000	1878	0.00385665
1	48825001	48975000	1420	0.00287028
1	48900001	49050000	1598	0.00346295
1	48975001	49125000	1762	0.0036724
1	49050001	49200000	1954	0.0037162
1	49125001	49275000	2256	0.00461994
1	49200001	49350000	1941	0.00397166
1	49275001	49425000	972	0.0018371
1	49350001	49500000	412	0.000694861
1	49425001	49575000	692	0.00129366
1	49500001	49650000	485	0.000925173
1	49575001	49725000	650	0.00127141
1	49650001	49800000	1759	0.00334584
1	49725001	49875000	2170	0.00413372
1	49800001	49950000	1947	0.00372294
1	49875001	50025000	1780	0.00317903
1	49950001	50100000	1765	0.00326672
1	50025001	50175000	1521	0.00287451
1	50100001	50250000	1015	0.00180874
1	50175001	50325000	1445	0.00290058
1	50250001	50400000	1848	0.00378667
1	50325001	50475000	1713	0.00343737
1	50400001	50550000	2081	0.00402737
1	50475001	50625000	2202	0.00391504
1	50550001	50700000	1547	0.00298018
1	50625001	50775000	1067	0.00235784
1	50700001	50850000	1412	0.00271437
1	50775001	50925000	1979	0.00369759
1	50850001	51000000	1577	0.00296413
1	50925001	51075000	1336	0.00247919
1	51000001	51150000	1016	0.00176808
1	51075001	51225000	875	0.00141473
1	51150001	51300000	1147	0.0020217
1	51225001	51375000	448	0.000866467
1	51300001	51450000	622	0.00123632
1	51375001	51525000	1914	0.00363667
1	51450001	51600000	2334	0.0044651
1	51525001	51675000	1774	0.00366877
1	51600001	51750000	1513	0.00318699
1	51675001	51825000	1419	0.00274673
1	51750001	51900000	1531	0.00292363
1	51825001	51975000	1656	0.00304704
1	51900001	52050000	1575	0.00274716
1	51975001	52125000	1619	0.00299823
1	52050001	52200000	1892	0.00378372
1	52125001	52275000	1992	0.00414138
1	52200001	52350000	1998	0.00408073
1	52275001	52425000	1845	0.00332775
1	52350001	52500000	1801	0.0027618
1	52425001	52575000	2186	0.0038697
1	52500001	52650000	1856	0.00359587
1	52575001	52725000	1927	0.00363376
1	52650001	52800000	2239	0.00433284
1	52725001	52875000	1647	0.00276351
1	52800001	52950000	1988	0.00349934
1	52875001	53025000	2531	0.00492829
1	52950001	53100000	2257	0.00423562
1	53025001	53175000	1964	0.00381338
1	53100001	53250000	1782	0.00346816
1	53175001	53325000	2059	0.00407643
1	53250001	53400000	2086	0.00427118
1	53325001	53475000	1877	0.00371278
1	53400001	53550000	1979	0.00388613
1	53475001	53625000	1594	0.00304254
1	53550001	53700000	650	0.00109036
1	53625001	53775000	288	0.000473437
1	53700001	53850000	716	0.00115182
1	53775001	53925000	1522	0.00263021
1	53850001	54000000	1492	0.00268944
1	53925001	54075000	1499	0.00298228
1	54000001	54150000	1918	0.00376909
1	54075001	54225000	1639	0.00313199
1	54150001	54300000	1610	0.00305838
1	54225001	54375000	1807	0.00336432
1	54300001	54450000	2071	0.00392458
1	54375001	54525000	1902	0.00352092
1	54450001	54600000	1704	0.0031553
1	54525001	54675000	1618	0.00301855
1	54600001	54750000	713	0.00130197
1	54675001	54825000	261	0.000475909
1	54750001	54900000	984	0.00194452
1	54825001	54975000	1584	0.00322456
1	54900001	55050000	860	0.00175409
1	54975001	55125000	394	0.000621218
1	55050001	55200000	1175	0.00214655
1	55125001	55275000	1693	0.00343538
1	55200001	55350000	1435	0.00293483
1	55275001	55425000	1346	0.00267258
1	55350001	55500000	1843	0.00370434
1	55425001	55575000	1945	0.00397758
1	55500001	55650000	1436	0.00289036
1	55575001	55725000	1035	0.00197421
1	55650001	55800000	1483	0.00279352
1	55725001	55875000	1970	0.00373166
1	55800001	55950000	1541	0.00290221
1	55875001	56025000	1243	0.00232421
1	55950001	56100000	1647	0.00322733
1	56025001	56175000	1165	0.00221078
1	56100001	56250000	352	0.000541778
1	56175001	56325000	689	0.00135902
1	56250001	56400000	1649	0.00336193
1	56325001	56475000	2141	0.00432429
1	56400001	56550000	1937	0.0038934
1	56475001	56625000	2069	0.00417468
1	56550001	56700000	2098	0.00423757
1	56625001	56775000	2013	0.0042168
1	56700001	56850000	1918	0.00380829
1	56775001	56925000	1970	0.00340525
1	56850001	57000000	2368	0.00432959
1	56925001	57075000	2522	0.00490525
1	57000001	57150000	2284	0.00450768
1	57075001	57225000	1962	0.00372859
1	57150001	57300000	1790	0.00322901
1	57225001	57375000	1872	0.00365545
1	57300001	57450000	2012	0.00407294
1	57375001	57525000	2120	0.00414683
1	57450001	57600000	2116	0.00402912
1	57525001	57675000	2201	0.00420836
1	57600001	57750000	2187	0.00412721
1	57675001	57825000	2029	0.00396702
1	57750001	57900000	2018	0.00408266
1	57825001	57975000	1897	0.00390594
1	57900001	58050000	1940	0.00396674
1	57975001	58125000	2121	0.0042118
1	58050001	58200000	1520	0.00288471
1	58125001	58275000	896	0.00136933
1	58200001	58350000	1226	0.00193969
1	58275001	58425000	1442	0.00252888
1	58350001	58500000	1297	0.00237243
1	58425001	58575000	982	0.00179594
1	58500001	58650000	1244	0.00236981
1	58575001	58725000	1983	0.00375794
1	58650001	58800000	2370	0.00469361
1	58725001	58875000	2181	0.00465196
1	58800001	58950000	2454	0.00536622
1	58875001	59025000	2510	0.00520826
1	58950001	59100000	2171	0.00455172
1	59025001	59175000	1929	0.00391815
1	59100001	59250000	1623	0.00321048
1	59175001	59325000	1776	0.00369819
1	59250001	59400000	1807	0.00350953
1	59325001	59475000	1831	0.00364895
1	59400001	59550000	1851	0.00390839
1	59475001	59625000	1718	0.00352841
1	59550001	59700000	1905	0.00381539
1	59625001	59775000	2467	0.00499758
1	59700001	59850000	2676	0.00561976
1	59775001	59925000	2457	0.00531235
1	59850001	60000000	2234	0.00454641
1	59925001	60075000	2228	0.00417066
1	60000001	60150000	2420	0.00470589
1	60075001	60225000	2401	0.00488936
1	60150001	60300000	2188	0.0047116
1	60225001	60375000	1881	0.00405907
1	60300001	60450000	1612	0.00323349
1	60375001	60525000	1932	0.00381414
1	60450001	60600000	2172	0.00430608
1	60525001	60675000	2091	0.00427352
1	60600001	60750000	2207	0.00433293
1	60675001	60825000	2534	0.00494448
1	60750001	60900000	2688	0.00543809
1	60825001	60975000	2278	0.00435566
1	60900001	61050000	2032	0.00374398
1	60975001	61125000	2040	0.00379207
1	61050001	61200000	1940	0.00356755
1	61125001	61275000	1789	0.00342527
1	61200001	61350000	1683	0.00317608
1	61275001	61425000	1547	0.00293112
1	61350001	61500000	1678	0.00322008
1	61425001	61575000	1973	0.00359314
1	61500001	61650000	2134	0.003811
1	61575001	61725000	2019	0.00348531
1	61650001	61800000	1715	0.00307042
1	61725001	61875000	1867	0.00342909
1	61800001	61950000	2047	0.00340126
1	61875001	62025000	1807	0.0029455
1	61950001	62100000	1901	0.00340518
1	62025001	62175000	2041	0.00373594
1	62100001	62250000	1659	0.00307741
1	62175001	62325000	1234	0.002302
1	62250001	62400000	1210	0.00223792
1	62325001	62475000	1654	0.00313007
1	62400001	62550000	1681	0.00314076
1	62475001	62625000	1182	0.00223907
1	62550001	62700000	1101	0.00192776
1	62625001	62775000	1245	0.00200995
1	62700001	62850000	934	0.00151944
1	62775001	62925000	931	0.00156189
1	62850001	63000000	1470	0.00269722
1	62925001	63075000	1470	0.00272643
1	63000001	63150000	689	0.00117139
1	63075001	63225000	1146	0.00209453
1	63150001	63300000	1839	0.00349875
1	63225001	63375000	2006	0.00397504
1	63300001	63450000	2224	0.00432156
1	63375001	63525000	1952	0.00381648
1	63450001	63600000	1044	0.00206217
1	63525001	63675000	538	0.00100092
1	63600001	63750000	1202	0.00231703
1	63675001	63825000	1474	0.00288058
1	63750001	63900000	1719	0.00331999
1	63825001	63975000	1876	0.0034532
1	63900001	64050000	889	0.00158337
1	63975001	64125000	632	0.00119597
1	64050001	64200000	1531	0.00267907
1	64125001	64275000	2138	0.00390928
1	64200001	64350000	2469	0.004757
1	64275001	64425000	2304	0.00440016
1	64350001	64500000	2211	0.00414397
1	64425001	64575000	1821	0.00347972
1	64500001	64650000	813	0.00163001
1	64575001	64725000	234	0.000353094
1	64650001	64800000	1044	0.00214235
1	64725001	64875000	2355	0.00479795
1	64800001	64950000	2294	0.0044629
1	64875001	65025000	1712	0.00325856
1	64950001	65100000	1818	0.00355635
1	65025001	65175000	1933	0.00383431
1	65100001	65250000	1878	0.00381953
1	65175001	65325000	1686	0.00330774
1	65250001	65400000	1837	0.00357383
1	65325001	65475000	2046	0.00420517
1	65400001	65550000	1945	0.00369252
1	65475001	65625000	2151	0.00431932
1	65550001	65700000	1797	0.0036597
1	65625001	65775000	982	0.00152715
1	65700001	65850000	1023	0.00179573
1	65775001	65925000	1618	0.00324661
1	65850001	66000000	1845	0.00372414
1	65925001	66075000	1616	0.00319099
1	66000001	66150000	1536	0.00307256
1	66075001	66225000	1893	0.00376354
1	66150001	66300000	1952	0.00371706
1	66225001	66375000	1913	0.0038067
1	66300001	66450000	1996	0.00401092
1	66375001	66525000	1863	0.00368081
1	66450001	66600000	1722	0.00357624
1	66525001	66675000	1806	0.00354492
1	66600001	66750000	1940	0.00372609
1	66675001	66825000	1627	0.00325065
1	66750001	66900000	1602	0.00327444
1	66825001	66975000	1898	0.00400832
1	66900001	67050000	1675	0.00351523
1	66975001	67125000	1742	0.00343148
1	67050001	67200000	1806	0.00344782
1	67125001	67275000	1326	0.00241179
1	67200001	67350000	1448	0.00263832
1	67275001	67425000	2281	0.0046332
1	67350001	67500000	2185	0.00441707
1	67425001	67575000	1935	0.00372366
1	67500001	67650000	2073	0.00401034
1	67575001	67725000	2117	0.00387982
1	67650001	67800000	2466	0.00455367
1	67725001	67875000	2327	0.00442581
1	67800001	67950000	2138	0.00421757
1	67875001	68025000	1843	0.00377305
1	67950001	68100000	1569	0.00311739
1	68025001	68175000	1608	0.00326783
1	68100001	68250000	1838	0.00408478
1	68175001	68325000	2052	0.00460632
1	68250001	68400000	1778	0.00373117
1	68325001	68475000	1522	0.00323955
1	68400001	68550000	1312	0.00273637
1	68475001	68625000	1275	0.00233299
1	68550001	68700000	1352	0.00268666
1	68625001	68775000	1478	0.00308316
1	68700001	68850000	1468	0.00306289
1	68775001	68925000	1408	0.00285473
1	68850001	69000000	1388	0.00269312
1	68925001	69075000	1071	0.00204216
1	69000001	69150000	1027	0.00195159
1	69075001	69225000	620	0.00119229
1	69150001	69300000	155	0.000279271
1	69225001	69375000	516	0.000912962
1	69300001	69450000	1148	0.00226556
1	69375001	69525000	1544	0.003196
1	69450001	69600000	1374	0.00281706
1	69525001	69675000	1065	0.00198357
1	69600001	69750000	953	0.00156557
1	69675001	69825000	1143	0.00192678
1	69750001	69900000	1683	0.00320499
1	69825001	69975000	2134	0.00394034
1	69900001	70050000	2022	0.00317726
1	69975001	70125000	3094	0.00408057
1	70050001	70200000	5063	0.00812799
1	70125001	70275000	4617	0.00753781
1	70200001	70350000	3854	0.00602107
1	70275001	70425000	2397	0.00416096
1	70350001	70500000	903	0.00101126
1	70425001	70575000	1298	0.00150975
1	70500001	70650000	2827	0.00407552
1	70575001	70725000	3180	0.00533125
1	70650001	70800000	1743	0.00346995
1	70725001	70875000	1593	0.00314067
1	70800001	70950000	1676	0.00332565
1	70875001	71025000	1705	0.00334787
1	70950001	71100000	1787	0.00355653
1	71025001	71175000	1637	0.003224
1	71100001	71250000	1524	0.00263554
1	71175001	71325000	1659	0.00273612
1	71250001	71400000	1934	0.00365637
1	71325001	71475000	1955	0.00394587
1	71400001	71550000	1750	0.00351606
1	71475001	71625000	1520	0.00307432
1	71550001	71700000	1157	0.00227522
1	71625001	71775000	926	0.00181897
1	71700001	71850000	1410	0.002913
1	71775001	71925000	2020	0.00400617
1	71850001	72000000	1692	0.00331816
1	71925001	72075000	1325	0.00263813
1	72000001	72150000	1277	0.00240749
1	72075001	72225000	909	0.00172807
1	72150001	72300000	864	0.00161286
1	72225001	72375000	1333	0.00235625
1	72300001	72450000	1376	0.00257825
1	72375001	72525000	859	0.00176942
1	72450001	72600000	949	0.00188003
1	72525001	72675000	720	0.00135965
1	72600001	72750000	182	0.000339014
1	72675001	72825000	802	0.00174544
1	72750001	72900000	1396	0.00295984
1	72825001	72975000	1426	0.00280225
1	72900001	73050000	1301	0.00248346
1	72975001	73125000	1196	0.00232712
1	73050001	73200000	960	0.00177886
1	73125001	73275000	473	0.000733119
1	73200001	73350000	533	0.000826252
1	73275001	73425000	1021	0.00175166
1	73350001	73500000	968	0.00167183
1	73425001	73575000	1021	0.00187746
1	73500001	73650000	1394	0.00283457
1	73575001	73725000	1304	0.00272973
1	73650001	73800000	1255	0.00262699
1	73725001	73875000	1239	0.0025736
1	73800001	73950000	1122	0.00212043
1	73875001	74025000	1112	0.00212738
1	73950001	74100000	1464	0.00283828
1	74025001	74175000	1762	0.00336267
1	74100001	74250000	1556	0.00299683
1	74175001	74325000	1263	0.00248075
1	74250001	74400000	1297	0.00257354
1	74325001	74475000	1005	0.00173766
1	74400001	74550000	753	0.0013303
1	74475001	74625000	728	0.00143855
1	74550001	74700000	817	0.0017124
1	74625001	74775000	962	0.00207041
1	74700001	74850000	696	0.00146058
1	74775001	74925000	1013	0.00218442
1	74850001	75000000	1578	0.00346122
1	74925001	75075000	1668	0.00367684
1	75000001	75150000	1778	0.00361548
1	75075001	75225000	1766	0.00343187
1	75150001	75300000	1575	0.00328983
1	75225001	75375000	1452	0.00297546
1	75300001	75450000	1281	0.00236373
1	75375001	75525000	1185	0.00212443
1	75450001	75600000	901	0.00171272
1	75525001	75675000	528	0.00103893
1	75600001	75750000	1136	0.00233584
1	75675001	75825000	1700	0.0035324
1	75750001	75900000	1832	0.00405926
1	75825001	75975000	2233	0.00499153
1	75900001	76050000	2207	0.00460326
1	75975001	76125000	2035	0.00435643
1	76050001	76200000	1807	0.00374699
1	76125001	76275000	1830	0.00350186
1	76200001	76350000	1769	0.00340539
1	76275001	76425000	1681	0.00343795
1	76350001	76500000	1488	0.00301703
1	76425001	76575000	1310	0.00242216
1	76500001	76650000	1290	0.00247426
1	76575001	76725000	1388	0.00284405
1	76650001	76800000	1951	0.0040689
1	76725001	76875000	1975	0.00409674
1	76800001	76950000	1979	0.00413623
1	76875001	77025000	2152	0.00433216
1	76950001	77100000	1994	0.0037601
1	77025001	77175000	2437	0.00482856
1	77100001	77250000	2817	0.0058764
1	77175001	77325000	2181	0.00431728
1	77250001	77400000	1982	0.00388299
1	77325001	77475000	1975	0.00399623
1	77400001	77550000	1886	0.00349293
1	77475001	77625000	2184	0.00418385
1	77550001	77700000	2022	0.00409209
1	77625001	77775000	1770	0.0035407
1	77700001	77850000	1633	0.00314971
1	77775001	77925000	1380	0.00270767
1	77850001	78000000	1271	0.00244669
1	77925001	78075000	1151	0.00198868
1	78000001	78150000	1051	0.00163031
1	78075001	78225000	1431	0.00257224
1	78150001	78300000	2079	0.00419672
1	78225001	78375000	2137	0.00414534
1	78300001	78450000	1940	0.00353435
1	78375001	78525000	2145	0.00407721
1	78450001	78600000	1707	0.00320951
1	78525001	78675000	1450	0.00254085
1	78600001	78750000	1891	0.00357172
1	78675001	78825000	1974	0.00387889
1	78750001	78900000	1901	0.00371204
1	78825001	78975000	1806	0.00345141
1	78900001	79050000	920	0.00171596
1	78975001	79125000	59	9.01993e-05
1	79050001	79200000	730	0.00129007
1	79125001	79275000	1518	0.00285927
1	79200001	79350000	1701	0.00346806
1	79275001	79425000	1919	0.00380052
1	79350001	79500000	2060	0.00404263
1	79425001	79575000	2094	0.00411513
1	79500001	79650000	1843	0.00353032
1	79575001	79725000	1439	0.00273969
1	79650001	79800000	1493	0.00297778
1	79725001	79875000	1542	0.00328105
1	79800001	79950000	838	0.0017242
1	79875001	80025000	1010	0.00207571
1	79950001	80100000	1774	0.00361709
1	80025001	80175000	1910	0.00373224
1	80100001	80250000	1599	0.00312294
1	80175001	80325000	1794	0.00359354
1	80250001	80400000	2215	0.00430362
1	80325001	80475000	2043	0.00378477
1	80400001	80550000	2216	0.00400265
1	80475001	80625000	2113	0.00389221
1	80550001	80700000	1574	0.00298356
1	80625001	80775000	880	0.00153346
1	80700001	80850000	1459	0.00290284
1	80775001	80925000	2241	0.00456557
1	80850001	81000000	2353	0.00484152
1	80925001	81075000	2450	0.00520934
1	81000001	81150000	2376	0.00498094
1	81075001	81225000	1976	0.00398608
1	81150001	81300000	1530	0.00306996
1	81225001	81375000	2084	0.00411285
1	81300001	81450000	2524	0.0050349
1	81375001	81525000	2134	0.0042695
1	81450001	81600000	2004	0.00376681
1	81525001	81675000	2264	0.00445577
1	81600001	81750000	2221	0.00465873
1	81675001	81825000	2110	0.00432431
1	81750001	81900000	1740	0.00344116
1	81825001	81975000	1199	0.00235396
1	81900001	82050000	1357	0.00256204
1	81975001	82125000	1719	0.0033225
1	82050001	82200000	1710	0.00338304
1	82125001	82275000	1678	0.00319252
1	82200001	82350000	1627	0.00323439
1	82275001	82425000	1773	0.00374428
1	82350001	82500000	2064	0.00448415
1	82425001	82575000	2183	0.00456645
1	82500001	82650000	2181	0.00436315
1	82575001	82725000	1512	0.00310112
1	82650001	82800000	986	0.00177713
1	82725001	82875000	1318	0.0023819
1	82800001	82950000	1596	0.0032764
1	82875001	83025000	1958	0.00415353
1	82950001	83100000	2137	0.0043899
1	83025001	83175000	2031	0.00407626
1	83100001	83250000	1949	0.00403637
1	83175001	83325000	2190	0.00462618
1	83250001	83400000	2336	0.00463967
1	83325001	83475000	2185	0.00421632
1	83400001	83550000	2020	0.00388838
1	83475001	83625000	1669	0.00278078
1	83550001	83700000	1585	0.0028668
1	83625001	83775000	2064	0.00424203
1	83700001	83850000	2448	0.00496546
1	83775001	83925000	2415	0.0046039
1	83850001	84000000	2276	0.00435182
1	83925001	84075000	2401	0.00474287
1	84000001	84150000	2647	0.0054243
1	84075001	84225000	2482	0.00504484
1	84150001	84300000	2417	0.00440406
1	84225001	84375000	2697	0.00485538
1	84300001	84450000	2498	0.00448519
1	84375001	84525000	2311	0.00384763
1	84450001	84600000	2277	0.00376121
1	84525001	84675000	1638	0.00310163
1	84600001	84750000	1608	0.00331486
1	84675001	84825000	2104	0.0042959
1	84750001	84900000	1953	0.00366246
1	84825001	84975000	2014	0.0036652
1	84900001	85050000	2285	0.00441177
1	84975001	85125000	2107	0.0045152
1	85050001	85200000	1831	0.0039293
1	85125001	85275000	2004	0.00361197
1	85200001	85350000	1928	0.00330087
1	85275001	85425000	1528	0.00287324
1	85350001	85500000	2081	0.00427132
1	85425001	85575000	2275	0.00468839
1	85500001	85650000	1829	0.00344263
1	85575001	85725000	2092	0.00376423
1	85650001	85800000	2141	0.00441514
1	85725001	85875000	1860	0.00398797
1	85800001	85950000	1983	0.00411803
1	85875001	86025000	2386	0.00485663
1	85950001	86100000	2490	0.00489686
1	86025001	86175000	2363	0.00482932
1	86100001	86250000	2229	0.00469216
1	86175001	86325000	2012	0.00408652
1	86250001	86400000	2115	0.00407098
1	86325001	86475000	2170	0.00407815
1	86400001	86550000	1770	0.00335658
1	86475001	86625000	2011	0.00388614
1	86550001	86700000	2927	0.00560812
1	86625001	86775000	2931	0.00563329
1	86700001	86850000	2496	0.00495829
1	86775001	86925000	3165	0.00620599
1	86850001	87000000	3562	0.00714793
1	86925001	87075000	2937	0.00622064
1	87000001	87150000	2382	0.00490882
1	87075001	87225000	2507	0.00444268
1	87150001	87300000	2731	0.00480647
1	87225001	87375000	2485	0.00479175
1	87300001	87450000	2444	0.0049346
1	87375001	87525000	2645	0.00526938
1	87450001	87600000	2576	0.00496903
1	87525001	87675000	2285	0.00432638
1	87600001	87750000	2372	0.00436937
1	87675001	87825000	2319	0.00445049
1	87750001	87900000	2276	0.00456952
1	87825001	87975000	2330	0.00439519
1	87900001	88050000	2533	0.0047937
1	87975001	88125000	2736	0.00520478
1	88050001	88200000	2525	0.00449999
1	88125001	88275000	2328	0.00435156
1	88200001	88350000	2435	0.00475064
1	88275001	88425000	2366	0.00451331
1	88350001	88500000	2026	0.00387578
1	88425001	88575000	2052	0.00422372
1	88500001	88650000	2115	0.00438717
1	88575001	88725000	2212	0.0045337
1	88650001	88800000	2286	0.00482211
1	88725001	88875000	2206	0.00444699
1	88800001	88950000	2264	0.00447634
1	88875001	89025000	1894	0.00381195
1	88950001	89100000	1663	0.00330869
1	89025001	89175000	1847	0.00361222
1	89100001	89250000	1822	0.0034463
1	89175001	89325000	1903	0.00366951
1	89250001	89400000	1921	0.00392267
1	89325001	89475000	1986	0.00395727
1	89400001	89550000	2087	0.00396983
1	89475001	89625000	2024	0.00403855
1	89550001	89700000	1869	0.00385378
1	89625001	89775000	1677	0.00338561
1	89700001	89850000	1848	0.00357874
1	89775001	89925000	2178	0.00419386
1	89850001	90000000	2094	0.00408978
1	89925001	90075000	1983	0.00411324
1	90000001	90150000	2025	0.00434006
1	90075001	90225000	1510	0.0030985
1	90150001	90300000	1193	0.00255956
1	90225001	90375000	1775	0.00391553
1	90300001	90450000	2114	0.00445283
1	90375001	90525000	1928	0.00370806
1	90450001	90600000	1698	0.00322117
1	90525001	90675000	1479	0.00294781
1	90600001	90750000	1475	0.00269634
1	90675001	90825000	1850	0.00349613
1	90750001	90900000	1816	0.00368224
1	90825001	90975000	1324	0.00259018
1	90900001	91050000	1396	0.0027501
1	90975001	91125000	1447	0.00292161
1	91050001	91200000	1000	0.00173788
1	91125001	91275000	953	0.00137453
1	91200001	91350000	1005	0.00172435
1	91275001	91425000	905	0.00185111
1	91350001	91500000	1165	0.00215305
1	91425001	91575000	2212	0.00441257
1	91500001	91650000	2888	0.00617287
1	91575001	91725000	2014	0.00427802
1	91650001	91800000	1463	0.00322613
1	91725001	91875000	1382	0.00310427
1	91800001	91950000	1051	0.00237109
1	91875001	92025000	1198	0.00251107
1	91950001	92100000	1374	0.00261112
1	92025001	92175000	1137	0.00208806
1	92100001	92250000	910	0.00167521
1	92175001	92325000	1346	0.00257218
1	92250001	92400000	1763	0.00351895
1	92325001	92475000	1796	0.00367844
1	92400001	92550000	1575	0.0030733
1	92475001	92625000	1396	0.00262739
1	92550001	92700000	1751	0.00343799
1	92625001	92775000	1935	0.00384597
1	92700001	92850000	1640	0.00320438
1	92775001	92925000	1388	0.00270526
1	92850001	93000000	1048	0.00215848
1	92925001	93075000	719	0.0015159
1	93000001	93150000	1016	0.00207992
1	93075001	93225000	1532	0.00313128
1	93150001	93300000	2080	0.00430218
1	93225001	93375000	2344	0.00499614
1	93300001	93450000	2137	0.00436674
1	93375001	93525000	1186	0.00218858
1	93450001	93600000	711	0.0013457
1	93525001	93675000	1438	0.00290502
1	93600001	93750000	2141	0.00425902
1	93675001	93825000	2031	0.00396624
1	93750001	93900000	1228	0.00232822
1	93825001	93975000	1078	0.00202118
1	93900001	94050000	1475	0.00298264
1	93975001	94125000	1615	0.00333963
1	94050001	94200000	1473	0.00281208
1	94125001	94275000	1513	0.00290675
1	94200001	94350000	1495	0.00306132
1	94275001	94425000	1851	0.00387289
1	94350001	94500000	2479	0.00525869
1	94425001	94575000	2089	0.00443453
1	94500001	94650000	1287	0.00256379
1	94575001	94725000	763	0.00133525
1	94650001	94800000	714	0.00119481
1	94725001	94875000	829	0.00151138
1	94800001	94950000	1484	0.00301764
1	94875001	95025000	1629	0.00328359
1	94950001	95100000	1262	0.00245532
1	95025001	95175000	1304	0.00257755
1	95100001	95250000	1364	0.00283441
1	95175001	95325000	926	0.0019649
1	95250001	95400000	986	0.00202965
1	95325001	95475000	1886	0.00388944
1	95400001	95550000	1985	0.00401905
1	95475001	95625000	1581	0.00293989
1	95550001	95700000	1835	0.00350542
1	95625001	95775000	1990	0.00397579
1	95700001	95850000	1575	0.00316239
1	95775001	95925000	1276	0.00253944
1	95850001	96000000	1107	0.00194038
1	95925001	96075000	1293	0.00242254
1	96000001	96150000	1318	0.00272622
1	96075001	96225000	1579	0.00315807
1	96150001	96300000	1775	0.00339885
1	96225001	96375000	1898	0.00383072
1	96300001	96450000	2330	0.00489073
1	96375001	96525000	2077	0.00422938
1	96450001	96600000	1189	0.00231532
1	96525001	96675000	844	0.00157531
1	96600001	96750000	1141	0.00218361
1	96675001	96825000	1187	0.00227912
1	96750001	96900000	1327	0.00247411
1	96825001	96975000	1338	0.0026564
1	96900001	97050000	1059	0.00218734
1	96975001	97125000	732	0.00139138
1	97050001	97200000	455	0.000790357
1	97125001	97275000	808	0.00146518
1	97200001	97350000	1351	0.00269762
1	97275001	97425000	1603	0.00332617
1	97350001	97500000	1621	0.00326253
1	97425001	97575000	1560	0.00313155
1	97500001	97650000	1635	0.003415
1	97575001	97725000	2027	0.00432334
1	97650001	97800000	2202	0.00450538
1	97725001	97875000	2015	0.00414153
1	97800001	97950000	1861	0.00387366
1	97875001	98025000	1743	0.00346318
1	97950001	98100000	1808	0.00353601
1	98025001	98175000	1891	0.00359568
1	98100001	98250000	1914	0.00363524
1	98175001	98325000	1973	0.00377245
1	98250001	98400000	1848	0.0036249
1	98325001	98475000	1716	0.00338751
1	98400001	98550000	1864	0.00366925
1	98475001	98625000	1951	0.00379955
1	98550001	98700000	1815	0.00352828
1	98625001	98775000	1665	0.00332512
1	98700001	98850000	1446	0.0029581
1	98775001	98925000	1431	0.00289838
1	98850001	99000000	1658	0.00327119
1	98925001	99075000	1601	0.00325617
1	99000001	99150000	1861	0.00375185
1	99075001	99225000	2084	0.00424589
1	99150001	99300000	1843	0.00394901
1	99225001	99375000	1741	0.00376214
1	99300001	99450000	1927	0.00416373
1	99375001	99525000	2123	0.00450044
1	99450001	99600000	2018	0.00407511
1	99525001	99675000	1860	0.00370891
1	99600001	99750000	1426	0.00270743
1	99675001	99825000	1415	0.00265267
1	99750001	99900000	1733	0.00342897
1	99825001	99975000	1905	0.00380053
1	99900001	100050000	2118	0.00433097
1	99975001	100125000	2080	0.00434789
1	100050001	100200000	1956	0.00407209
1	100125001	100275000	1865	0.00380586
1	100200001	100350000	1933	0.00385201
1	100275001	100425000	1786	0.00360009
1	100350001	100500000	1153	0.00237904
1	100425001	100575000	1453	0.00305598
1	100500001	100650000	1945	0.00407241
1	100575001	100725000	1065	0.00213426
1	100650001	100800000	820	0.00154173
1	100725001	100875000	1606	0.00299637
1	100800001	100950000	1745	0.00310488
1	100875001	101025000	1767	0.0031376
1	100950001	101100000	1800	0.00338073
1	101025001	101175000	1743	0.00343515
1	101100001	101250000	1918	0.00383442
1	101175001	101325000	1827	0.00365516
1	101250001	101400000	1802	0.00372385
1	101325001	101475000	1803	0.00370913
1	101400001	101550000	1609	0.00317822
1	101475001	101625000	1802	0.00364867
1	101550001	101700000	1826	0.00361361
1	101625001	101775000	1797	0.00363891
1	101700001	101850000	1523	0.00326555
1	101775001	101925000	1406	0.00296345
1	101850001	102000000	1556	0.00325441
1	101925001	102075000	1736	0.00349791
1	102000001	102150000	2003	0.00396812
1	102075001	102225000	1792	0.00362075
1	102150001	102300000	1458	0.00286411
1	102225001	102375000	1252	0.00247049
1	102300001	102450000	1193	0.00245573
1	102375001	102525000	1193	0.00237791
1	102450001	102600000	1395	0.00273056
1	102525001	102675000	1883	0.00371169
1	102600001	102750000	2250	0.00479857
1	102675001	102825000	1924	0.00423438
1	102750001	102900000	2155	0.00413018
1	102825001	102975000	2523	0.00450092
1	102900001	103050000	1783	0.00293569
1	102975001	103125000	1333	0.00203543
1	103050001	103200000	1867	0.00299731
1	103125001	103275000	2287	0.00348694
1	103200001	103350000	1904	0.00288967
1	103275001	103425000	1212	0.00184617
1	103350001	103500000	1126	0.00171642
1	103425001	103575000	1357	0.00216709
1	103500001	103650000	1340	0.00209157
1	103575001	103725000	1362	0.0023276
1	103650001	103800000	1475	0.00293418
1	103725001	103875000	1436	0.00292517
1	103800001	103950000	1450	0.00280915
1	103875001	104025000	1886	0.00374729
1	103950001	104100000	2015	0.0040629
1	104025001	104175000	1164	0.00231346
1	104100001	104250000	1077	0.00208003
1	104175001	104325000	1660	0.00329693
1	104250001	104400000	1470	0.00286399
1	104325001	104475000	1273	0.00234123
1	104400001	104550000	1156	0.00213011
1	104475001	104625000	1001	0.00196989
1	104550001	104700000	1247	0.00264411
1	104625001	104775000	1586	0.00313903
1	104700001	104850000	1335	0.00238625
1	104775001	104925000	967	0.00169801
1	104850001	105000000	805	0.00151674
1	104925001	105075000	669	0.00127975
1	105000001	105150000	376	0.000679045
1	105075001	105225000	547	0.00116385
1	105150001	105300000	1120	0.0023765
1	105225001	105375000	1456	0.00281105
1	105300001	105450000	1623	0.00262426
1	105375001	105525000	1634	0.00255371
1	105450001	105600000	1639	0.00307767
1	105525001	105675000	1881	0.00405188
1	105600001	105750000	1581	0.00343414
1	105675001	105825000	944	0.00189078
1	105750001	105900000	789	0.00147636
1	105825001	105975000	1328	0.00262608
1	105900001	106050000	1805	0.00379485
1	105975001	106125000	1399	0.00289758
1	106050001	106200000	1099	0.00204287
1	106125001	106275000	1002	0.00169056
1	106200001	106350000	1050	0.00196521
1	106275001	106425000	1057	0.0021433
1	106350001	106500000	1189	0.00237946
1	106425001	106575000	1154	0.00230622
1	106500001	106650000	1163	0.00238641
1	106575001	106725000	1226	0.00253828
1	106650001	106800000	1013	0.0020622
1	106725001	106875000	863	0.00169487
1	106800001	106950000	1025	0.00204195
1	106875001	107025000	1150	0.00231257
1	106950001	107100000	1363	0.00254483
1	107025001	107175000	1545	0.00284195
1	107100001	107250000	1417	0.00269461
1	107175001	107325000	1451	0.0028998
1	107250001	107400000	1391	0.00284552
1	107325001	107475000	1088	0.0019943
1	107400001	107550000	992	0.00183938
1	107475001	107625000	1192	0.00251363
1	107550001	107700000	1173	0.00233118
1	107625001	107775000	620	0.00116345
1	107700001	107850000	648	0.00135841
1	107775001	107925000	1308	0.00277975
1	107850001	108000000	1702	0.00353922
1	107925001	108075000	1857	0.00363421
1	108000001	108150000	1714	0.00326921
1	108075001	108225000	1377	0.00261947
1	108150001	108300000	1465	0.002969
1	108225001	108375000	2561	0.00540323
1	108300001	108450000	2168	0.00446813
1	108375001	108525000	1018	0.00177664
1	108450001	108600000	1378	0.00266916
1	108525001	108675000	2049	0.00403943
1	108600001	108750000	1834	0.00323941
1	108675001	108825000	1753	0.00308553
1	108750001	108900000	2229	0.00425661
1	108825001	108975000	2143	0.00422786
1	108900001	109050000	1098	0.00215234
1	108975001	109125000	824	0.00155333
1	109050001	109200000	1516	0.00260771
1	109125001	109275000	1573	0.0028564
1	109200001	109350000	1547	0.00286825
1	109275001	109425000	1480	0.00241949
1	109350001	109500000	789	0.00122528
1	109425001	109575000	808	0.00136274
1	109500001	109650000	1993	0.00354298
1	109575001	109725000	2424	0.00487997
1	109650001	109800000	2176	0.00469044
1	109725001	109875000	2050	0.0040933
1	109800001	109950000	2507	0.00490143
1	109875001	110025000	2475	0.00513309
1	109950001	110100000	1095	0.00235547
1	110025001	110175000	1127	0.00232948
1	110100001	110250000	1754	0.00356191
1	110175001	110325000	1335	0.00256447
1	110250001	110400000	1032	0.00206366
1	110325001	110475000	592	0.00119565
1	110400001	110550000	519	0.000916051
1	110475001	110625000	1122	0.00224536
1	110550001	110700000	1058	0.00217156
1	110625001	110775000	719	0.00141531
1	110700001	110850000	1426	0.0028924
1	110775001	110925000	1840	0.00380179
1	110850001	111000000	1561	0.00326686
1	110925001	111075000	1538	0.00297475
1	111000001	111150000	1591	0.00312224
1	111075001	111225000	1446	0.00302572
1	111150001	111300000	1491	0.00299957
1	111225001	111375000	1424	0.00287623
1	111300001	111450000	846	0.00167888
1	111375001	111525000	591	0.00101087
1	111450001	111600000	681	0.00124341
1	111525001	111675000	855	0.00172953
1	111600001	111750000	824	0.00163445
1	111675001	111825000	514	0.000925022
1	111750001	111900000	584	0.000906282
1	111825001	111975000	1113	0.00196155
1	111900001	112050000	1651	0.00335778
1	111975001	112125000	1472	0.00304913
1	112050001	112200000	1207	0.0024175
1	112125001	112275000	1289	0.00262765
1	112200001	112350000	1189	0.00237345
1	112275001	112425000	1213	0.00228644
1	112350001	112500000	1304	0.00243311
1	112425001	112575000	1221	0.00235304
1	112500001	112650000	1085	0.00202234
1	112575001	112725000	1234	0.00237505
1	112650001	112800000	1439	0.00295149
1	112725001	112875000	1343	0.00270508
1	112800001	112950000	1280	0.00250116
1	112875001	113025000	1195	0.00222934
1	112950001	113100000	1193	0.00229478
1	113025001	113175000	1384	0.00286762
1	113100001	113250000	1424	0.00305714
1	113175001	113325000	2193	0.00479692
1	113250001	113400000	2437	0.00503529
1	113325001	113475000	1148	0.0020657
1	113400001	113550000	454	0.000705768
1	113475001	113625000	560	0.00100797
1	113550001	113700000	1107	0.00192372
1	113625001	113775000	2051	0.00388319
1	113700001	113850000	2338	0.00465367
1	113775001	113925000	2503	0.00453559
1	113850001	114000000	2034	0.00364351
1	113925001	114075000	1243	0.00252812
1	114000001	114150000	1756	0.00380971
1	114075001	114225000	1949	0.0042068
1	114150001	114300000	1900	0.00393283
1	114225001	114375000	2064	0.00419607
1	114300001	114450000	2334	0.00474937
1	114375001	114525000	2344	0.00437516
1	114450001	114600000	2375	0.00459941
1	114525001	114675000	1989	0.00408824
1	114600001	114750000	1417	0.00280114
1	114675001	114825000	1443	0.0028505
1	114750001	114900000	1427	0.00285655
1	114825001	114975000	1754	0.0035712
1	114900001	115050000	2156	0.00397382
1	114975001	115125000	2095	0.00412379
1	115050001	115200000	1890	0.00366917
1	115125001	115275000	1944	0.00353583
1	115200001	115350000	1715	0.00327985
1	115275001	115425000	1810	0.00363896
1	115350001	115500000	1190	0.00249059
1	115425001	115575000	566	0.00126616
1	115500001	115650000	483	0.00111739
1	115575001	115725000	64	9.75469e-05
1	115650001	115800000	281	0.000424404
1	115725001	115875000	1711	0.00299565
1	115800001	115950000	2016	0.00367178
1	115875001	116025000	1747	0.00350816
1	115950001	116100000	2273	0.00465142
1	116025001	116175000	2119	0.00401488
1	116100001	116250000	1793	0.00335306
1	116175001	116325000	819	0.00161396
1	116250001	116400000	1296	0.00229329
1	116325001	116475000	2442	0.00451388
1	116400001	116550000	2424	0.00477733
1	116475001	116625000	2297	0.00449199
1	116550001	116700000	1906	0.003589
1	116625001	116775000	1734	0.0033586
1	116700001	116850000	1576	0.00309315
1	116775001	116925000	1583	0.00306547
1	116850001	117000000	1879	0.00362477
1	116925001	117075000	2137	0.00407904
1	117000001	117150000	1999	0.00380891
1	117075001	117225000	1520	0.00298233
1	117150001	117300000	862	0.0016988
1	117225001	117375000	281	0.000504182
1	117300001	117450000	142	0.000238462
1	117375001	117525000	427	0.000782863
1	117450001	117600000	1200	0.0022667
1	117525001	117675000	1554	0.00308007
1	117600001	117750000	1662	0.00335904
1	117675001	117825000	1472	0.00290762
1	117750001	117900000	1569	0.00319577
1	117825001	117975000	1664	0.00331704
1	117900001	118050000	1388	0.002747
1	117975001	118125000	1071	0.0021315
1	118050001	118200000	657	0.00115208
1	118125001	118275000	1009	0.00194737
1	118200001	118350000	1222	0.00236626
1	118275001	118425000	1308	0.00245727
1	118350001	118500000	1433	0.00265024
1	118425001	118575000	1456	0.00263496
1	118500001	118650000	1568	0.002916
1	118575001	118725000	2411	0.00462907
1	118650001	118800000	2944	0.00567998
1	118725001	118875000	1656	0.00310303
1	118800001	118950000	1143	0.00207549
1	118875001	119025000	890	0.00165461
1	118950001	119100000	190	0.000319939
1	119025001	119175000	653	0.0012051
1	119100001	119250000	1398	0.00201222
1	119175001	119325000	843	0.000962943
1	119250001	119400000	43	7.55435e-05
1	119325001	119475000	412	0.000583227
1	119400001	119550000	1422	0.00242832
1	119475001	119625000	1607	0.00297563
1	119550001	119700000	937	0.00175635
1	119625001	119775000	1017	0.00179068
1	119700001	119850000	1405	0.00280946
1	119775001	119925000	1442	0.0030759
1	119850001	120000000	688	0.00138971
1	119925001	120075000	367	0.000740802
1	120000001	120150000	1162	0.00212436
1	120075001	120225000	1628	0.00311708
1	120150001	120300000	1589	0.00344316
1	120225001	120375000	1251	0.00256375
1	120300001	120450000	854	0.00138423
1	120375001	120525000	860	0.00119248
1	120450001	120600000	1111	0.00192988
1	120525001	120675000	1436	0.00296692
1	120600001	120750000	1664	0.00316916
1	120675001	120825000	1828	0.00344977
1	120750001	120900000	2042	0.00421867
1	120825001	120975000	2073	0.00441
1	120900001	121050000	1763	0.00372133
1	120975001	121125000	1413	0.00283232
1	121050001	121200000	1605	0.00327868
1	121125001	121275000	1065	0.00224248
1	121200001	121350000	338	0.000650843
1	121275001	121425000	929	0.00177162
1	121350001	121500000	1565	0.00316122
1	121425001	121575000	1519	0.00301047
1	121500001	121650000	1123	0.00199955
1	121575001	121725000	1558	0.00282212
1	121650001	121800000	2280	0.00454821
1	121725001	121875000	2196	0.00476854
1	121800001	121950000	2169	0.00444381
1	121875001	122025000	2116	0.00409478
1	121950001	122100000	2101	0.00405701
1	122025001	122175000	1736	0.00313088
1	122100001	122250000	806	0.00130732
1	122175001	122325000	995	0.00179616
1	122250001	122400000	1421	0.00258332
1	122325001	122475000	1442	0.00280241
1	122400001	122550000	1835	0.00365166
1	122475001	122625000	1492	0.00281731
1	122550001	122700000	1209	0.00215095
1	122625001	122775000	1528	0.00254066
1	122700001	122850000	1745	0.00295933
1	122775001	122925000	1365	0.00245573
1	122850001	123000000	1346	0.00258036
1	122925001	123075000	1647	0.00304786
1	123000001	123150000	1679	0.00283214
1	123075001	123225000	1340	0.00223818
1	123150001	123300000	1122	0.00210627
1	123225001	123375000	1478	0.00302458
1	123300001	123450000	837	0.00169994
1	123375001	123525000	716	0.00116984
1	123450001	123600000	1151	0.00208596
1	123525001	123675000	1303	0.00222594
1	123600001	123750000	1831	0.00326855
1	123675001	123825000	1931	0.00378797
1	123750001	123900000	1844	0.00335648
1	123825001	123975000	1339	0.00231063
1	123900001	124050000	1050	0.00198274
1	123975001	124125000	1372	0.00268577
1	124050001	124200000	1295	0.00251673
1	124125001	124275000	1542	0.00311631
1	124200001	124350000	1434	0.00286849
1	124275001	124425000	758	0.0014112
1	124350001	124500000	1010	0.00201853
1	124425001	124575000	1690	0.00347835
1	124500001	124650000	1801	0.00375322
1	124575001	124725000	1621	0.00333962
1	124650001	124800000	1507	0.00311092
1	124725001	124875000	1528	0.00316815
1	124800001	124950000	1546	0.00310746
1	124875001	125025000	1566	0.00334232
1	124950001	125100000	1425	0.00304487
1	125025001	125175000	1460	0.00270505
1	125100001	125250000	1818	0.00352196
1	125175001	125325000	1955	0.00403507
1	125250001	125400000	1517	0.00272592
1	125325001	125475000	1161	0.00183363
1	125400001	125550000	1421	0.00249959
1	125475001	125625000	1771	0.00342709
1	125550001	125700000	1805	0.00376474
1	125625001	125775000	1768	0.00350155
1	125700001	125850000	1709	0.00340921
1	125775001	125925000	1506	0.00307134
1	125850001	126000000	1602	0.00334935
1	125925001	126075000	929	0.00200659
1	126000001	126150000	172	0.000347437
1	126075001	126225000	159	0.000321478
1	126150001	126300000	200	0.000332407
1	126225001	126375000	1004	0.00210341
1	126300001	126450000	1959	0.00425057
1	126375001	126525000	1901	0.00389518
1	126450001	126600000	1401	0.00270427
1	126525001	126675000	922	0.00181022
1	126600001	126750000	768	0.00140824
1	126675001	126825000	1418	0.0027908
1	126750001	126900000	1748	0.00382944
1	126825001	126975000	1606	0.00334417
1	126900001	127050000	1891	0.00351377
1	126975001	127125000	1504	0.0028046
1	127050001	127200000	898	0.00175145
1	127125001	127275000	741	0.00148586
1	127200001	127350000	685	0.00132223
1	127275001	127425000	881	0.00165413
1	127350001	127500000	1119	0.00222332
1	127425001	127575000	1279	0.00269276
1	127500001	127650000	934	0.00190845
1	127575001	127725000	773	0.00151276
1	127650001	127800000	1110	0.00239625
1	127725001	127875000	991	0.00221291
1	127800001	127950000	577	0.00112354
1	127875001	128025000	431	0.000713391
1	127950001	128100000	429	0.000732785
1	128025001	128175000	573	0.00102678
1	128100001	128250000	699	0.00125974
1	128175001	128325000	792	0.00161208
1	128250001	128400000	914	0.00208256
1	128325001	128475000	915	0.00208188
1	128400001	128550000	937	0.00211715
1	128475001	128625000	1019	0.0019372
1	128550001	128700000	2001	0.00332299
1	128625001	128775000	2132	0.00408524
1	128700001	128850000	1396	0.00311471
1	128775001	128925000	1375	0.00288424
1	128850001	129000000	1408	0.00298133
1	128925001	129075000	1846	0.00386429
1	129000001	129150000	1816	0.00344709
1	129075001	129225000	771	0.00129664
1	129150001	129300000	395	0.000792826
1	129225001	129375000	848	0.00168809
1	129300001	129450000	952	0.00184755
1	129375001	129525000	824	0.00164506
1	129450001	129600000	718	0.00140456
1	129525001	129675000	950	0.00176759
1	129600001	129750000	1024	0.0019555
1	129675001	129825000	728	0.00124463
1	129750001	129900000	530	0.000788567
1	129825001	129975000	638	0.00117649
1	129900001	130050000	611	0.00118998
1	129975001	130125000	477	0.000893133
1	130050001	130200000	534	0.000980563
1	130125001	130275000	699	0.00130481
1	130200001	130350000	856	0.00174153
1	130275001	130425000	865	0.00169414
1	130350001	130500000	1018	0.0019172
1	130425001	130575000	1212	0.0024554
1	130500001	130650000	1358	0.0027839
1	130575001	130725000	1412	0.00277189
1	130650001	130800000	1346	0.00254579
1	130725001	130875000	1292	0.00244344
1	130800001	130950000	1039	0.0018654
1	130875001	131025000	819	0.00136758
1	130950001	131100000	1402	0.00287655
1	131025001	131175000	1923	0.00410243
1	131100001	131250000	1308	0.00267992
1	131175001	131325000	515	0.00100481
1	131250001	131400000	1089	0.00211685
1	131325001	131475000	1915	0.00397082
1	131400001	131550000	1912	0.00411784
1	131475001	131625000	1657	0.0034723
1	131550001	131700000	1764	0.00372197
1	131625001	131775000	1853	0.00375369
1	131700001	131850000	1769	0.00349753
1	131775001	131925000	1885	0.00394432
1	131850001	132000000	1631	0.00329289
1	131925001	132075000	1094	0.00214442
1	132000001	132150000	1686	0.00349623
1	132075001	132225000	2260	0.00465938
1	132150001	132300000	2118	0.00434269
1	132225001	132375000	1962	0.00408399
1	132300001	132450000	1862	0.00379334
1	132375001	132525000	1786	0.00361406
1	132450001	132600000	1550	0.00316523
1	132525001	132675000	1933	0.00369033
1	132600001	132750000	2162	0.00428115
1	132675001	132825000	2190	0.00446028
1	132750001	132900000	2080	0.00392751
1	132825001	132975000	1043	0.00188154
1	132900001	133050000	1074	0.00230201
1	132975001	133125000	2174	0.00446544
1	133050001	133200000	2369	0.00481074
1	133125001	133275000	2430	0.00514593
1	133200001	133350000	2257	0.0049797
1	133275001	133425000	1926	0.00423579
1	133350001	133500000	2150	0.00422318
1	133425001	133575000	2307	0.00415854
1	133500001	133650000	1853	0.00329384
1	133575001	133725000	1748	0.0034241
1	133650001	133800000	1717	0.00338924
1	133725001	133875000	1217	0.00237134
1	133800001	133950000	640	0.00120197
1	133875001	134025000	968	0.00186707
1	133950001	134100000	1735	0.00359469
1	134025001	134175000	1714	0.00343223
1	134100001	134250000	1828	0.00345972
1	134175001	134325000	2077	0.00393565
1	134250001	134400000	1873	0.00358344
1	134325001	134475000	1850	0.00349012
1	134400001	134550000	2063	0.0041581
1	134475001	134625000	1925	0.00405721
1	134550001	134700000	1410	0.00280384
1	134625001	134775000	1463	0.00290022
1	134700001	134850000	1898	0.00383846
1	134775001	134925000	2185	0.0044889
1	134850001	135000000	2515	0.00513118
1	134925001	135075000	2297	0.00480979
1	135000001	135150000	1663	0.00350477
1	135075001	135225000	1636	0.00326215
1	135150001	135300000	1758	0.00373577
1	135225001	135375000	1851	0.0040069
1	135300001	135450000	1761	0.0034594
1	135375001	135525000	1625	0.00297512
1	135450001	135600000	2020	0.00387705
1	135525001	135675000	2105	0.00416141
1	135600001	135750000	1562	0.00301411
1	135675001	135825000	1507	0.00290367
1	135750001	135900000	2030	0.00400591
1	135825001	135975000	1882	0.00366698
1	135900001	136050000	1734	0.00341011
1	135975001	136125000	1932	0.00383461
1	136050001	136200000	1744	0.00311341
1	136125001	136275000	1463	0.00243111
1	136200001	136350000	1869	0.00323179
1	136275001	136425000	2267	0.00410973
1	136350001	136500000	1917	0.00337314
1	136425001	136575000	1982	0.00338612
1	136500001	136650000	2338	0.0042939
1	136575001	136725000	1242	0.00225372
1	136650001	136800000	150	0.000227578
1	136725001	136875000	966	0.00178352
1	136800001	136950000	2104	0.00417176
1	136875001	137025000	1981	0.00387775
1	136950001	137100000	1542	0.00282599
1	137025001	137175000	1011	0.00187255
1	137100001	137250000	544	0.000953918
1	137175001	137325000	1264	0.00244876
1	137250001	137400000	2116	0.00398314
1	137325001	137475000	1751	0.00298984
1	137400001	137550000	1514	0.00257925
1	137475001	137625000	1666	0.00306979
1	137550001	137700000	1359	0.00260777
1	137625001	137775000	1758	0.00363927
1	137700001	137850000	2055	0.00447671
1	137775001	137925000	1741	0.00396052
1	137850001	138000000	1620	0.0033841
1	137925001	138075000	1594	0.00307519
1	138000001	138150000	1851	0.00366645
1	138075001	138225000	2280	0.00448992
1	138150001	138300000	2465	0.00498681
1	138225001	138375000	2127	0.00433162
1	138300001	138450000	1214	0.00244765
1	138375001	138525000	1366	0.00274719
1	138450001	138600000	1254	0.00248592
1	138525001	138675000	561	0.000998666
1	138600001	138750000	1605	0.00301338
1	138675001	138825000	2177	0.0041928
1	138750001	138900000	1958	0.00386286
1	138825001	138975000	2149	0.00434546
1	138900001	139050000	2220	0.00456482
1	138975001	139125000	2129	0.00431056
1	139050001	139200000	2210	0.00446499
1	139125001	139275000	2266	0.0047043
1	139200001	139350000	1843	0.00372227
1	139275001	139425000	1356	0.00259646
1	139350001	139500000	1112	0.00203779
1	139425001	139575000	1318	0.00237525
1	139500001	139650000	1944	0.00380781
1	139575001	139725000	2168	0.00423587
1	139650001	139800000	2143	0.00405598
1	139725001	139875000	2427	0.00482564
1	139800001	139950000	2384	0.00466785
1	139875001	140025000	1564	0.0030459
1	139950001	140100000	861	0.00167381
1	140025001	140175000	1014	0.00185469
1	140100001	140250000	742	0.00135839
1	140175001	140325000	289	0.000386849
1	140250001	140400000	1522	0.00300051
1	140325001	140475000	2543	0.00498086
1	140400001	140550000	1751	0.00321598
1	140475001	140625000	797	0.00144734
1	140550001	140700000	1384	0.00278696
1	140625001	140775000	2327	0.00463843
1	140700001	140850000	2269	0.00430591
1	140775001	140925000	1793	0.00339591
1	140850001	141000000	2173	0.00456427
1	140925001	141075000	2453	0.00487288
1	141000001	141150000	2222	0.00394737
1	141075001	141225000	2429	0.00442241
1	141150001	141300000	2438	0.00451982
1	141225001	141375000	2628	0.00521732
1	141300001	141450000	2471	0.00467603
1	141375001	141525000	1661	0.0030694
1	141450001	141600000	1935	0.00371762
1	141525001	141675000	1957	0.0035216
1	141600001	141750000	782	0.00136076
1	141675001	141825000	287	0.000439689
1	141750001	141900000	269	0.000385985
1	141825001	141975000	339	0.000475086
1	141900001	142050000	1063	0.00183093
1	141975001	142125000	2233	0.00397705
1	142050001	142200000	2531	0.00452124
1	142125001	142275000	2977	0.00559266
1	142200001	142350000	3601	0.00725484
1	142275001	142425000	2954	0.00604534
1	142350001	142500000	2505	0.00512965
1	142425001	142575000	1382	0.00291563
1	142500001	142650000	314	0.000427996
1	142575001	142725000	1038	0.00144544
1	142650001	142800000	1115	0.00162032
1	142725001	142875000	850	0.00171417
1	142800001	142950000	700	0.00145248
1	142875001	143025000	1396	0.0025848
1	142950001	143100000	1961	0.00377581
1	143025001	143175000	846	0.00161425
1	143100001	143250000	222	0.00036398
1	143175001	143325000	1099	0.00213463
1	143250001	143400000	1456	0.00261759
1	143325001	143475000	648	0.000903163
1	143400001	143550000	683	0.00114141
1	143475001	143625000	1432	0.00257346
1	143550001	143700000	1961	0.00385896
1	143625001	143775000	2376	0.00499099
1	143700001	143850000	2158	0.00413351
1	143775001	143925000	2074	0.00377865
1	143850001	144000000	1855	0.00364085
1	143925001	144075000	977	0.00192896
1	144000001	144150000	1600	0.00306191
1	144075001	144225000	2747	0.0054547
1	144150001	144300000	1870	0.00365543
1	144225001	144375000	649	0.00100877
1	144300001	144450000	382	0.00063246
1	144375001	144525000	911	0.00159828
1	144450001	144600000	1561	0.00246023
1	144525001	144675000	2055	0.00344932
1	144600001	144750000	2436	0.00427754
1	144675001	144825000	2275	0.0034507
1	144750001	144900000	2382	0.00384486
1	144825001	144975000	2245	0.0041186
1	144900001	145050000	1206	0.00212156
1	144975001	145125000	557	0.000808743
1	145050001	145200000	707	0.00123682
1	145125001	145275000	1870	0.00382469
1	145200001	145350000	2419	0.00508843
1	145275001	145425000	1797	0.00361235
1	145350001	145500000	1234	0.00220628
1	145425001	145575000	1111	0.00223744
1	145500001	145650000	1514	0.00301094
1	145575001	145725000	823	0.00145185
1	145650001	145800000	725	0.00111671
1	145725001	145875000	1506	0.00232227
1	145800001	145950000	1891	0.00340235
1	145875001	146025000	2251	0.00442623
1	145950001	146100000	1905	0.00342601
1	146025001	146175000	1610	0.00282038
1	146100001	146250000	1847	0.00348484
1	146175001	146325000	1994	0.00388654
1	146250001	146400000	2180	0.00441038
1	146325001	146475000	2377	0.00476507
1	146400001	146550000	2605	0.00499166
1	146475001	146625000	2107	0.00404313
1	146550001	146700000	1656	0.00319578
1	146625001	146775000	2006	0.00358186
1	146700001	146850000	2017	0.00353769
1	146775001	146925000	1609	0.00291889
1	146850001	147000000	846	0.00151529
1	146925001	147075000	515	0.000807178
1	147000001	147150000	1411	0.00268134
1	147075001	147225000	1597	0.00330566
1	147150001	147300000	1337	0.00274937
1	147225001	147375000	1719	0.00314969
1	147300001	147450000	1885	0.00303781
1	147375001	147525000	1999	0.00314139
1	147450001	147600000	1360	0.00216864
1	147525001	147675000	360	0.000546448
1	147600001	147750000	715	0.00125123
1	147675001	147825000	1982	0.00379556
1	147750001	147900000	1337	0.00266326
1	147825001	147975000	640	0.00115919
1	147900001	148050000	1601	0.00299006
1	147975001	148125000	1914	0.00395436
1	148050001	148200000	2145	0.00456943
1	148125001	148275000	2427	0.00490759
1	148200001	148350000	2198	0.00423703
1	148275001	148425000	1914	0.00322341
1	148350001	148500000	1863	0.00323502
1	148425001	148575000	1336	0.00265793
1	148500001	148650000	1866	0.00344855
1	148575001	148725000	2777	0.00505746
1	148650001	148800000	1474	0.00273591
1	148725001	148875000	412	0.000809016
1	148800001	148950000	397	0.000762675
1	148875001	149025000	1193	0.00211514
1	148950001	149100000	2525	0.0048238
1	149025001	149175000	2599	0.00533769
1	149100001	149250000	2560	0.00523515
1	149175001	149325000	2466	0.00478284
1	149250001	149400000	2502	0.00493798
1	149325001	149475000	2738	0.00562434
1	149400001	149550000	2144	0.00443921
1	149475001	149625000	959	0.00194584
1	149550001	149700000	1553	0.00310497
1	149625001	149775000	2784	0.0056889
1	149700001	149850000	2301	0.00456366
1	149775001	149925000	1630	0.00300067
[truncated: 35,468 more rows]

## Sheet: Table S8
Table S8.FST values of EFS population and WS population
CHROM	BIN_START	BIN_END	N_VARIANTS	WEIGHTED_FST	MEAN_FST
1	1	150000	1843	0.214345	0.155219
1	75001	225000	1566	0.26181	0.168174
1	150001	300000	1427	0.273982	0.168097
1	225001	375000	1482	0.254932	0.163527
1	300001	450000	1591	0.229722	0.16082
1	375001	525000	1415	0.167208	0.128119
1	450001	600000	1548	0.149918	0.118145
1	525001	675000	1611	0.15473	0.122078
1	600001	750000	1501	0.163429	0.121828
1	675001	825000	2023	0.179038	0.139268
1	750001	900000	2114	0.136849	0.112653
1	825001	975000	2126	0.215191	0.155957
1	900001	1050000	2012	0.273201	0.195161
1	975001	1125000	1695	0.199725	0.143609
1	1050001	1200000	2299	0.202445	0.15272
1	1125001	1275000	2169	0.232758	0.167653
1	1200001	1350000	2011	0.169728	0.110012
1	1275001	1425000	3040	0.115907	0.0808226
1	1350001	1500000	3005	0.166567	0.116989
1	1425001	1575000	2805	0.175477	0.131872
1	1500001	1650000	3424	0.124658	0.102418
1	1575001	1725000	3171	0.119584	0.0981483
1	1650001	1800000	1908	0.138151	0.104178
1	1725001	1875000	1783	0.170049	0.124717
1	1800001	1950000	2325	0.216744	0.144216
1	1875001	2025000	2436	0.268989	0.169505
1	1950001	2100000	2377	0.268692	0.173236
1	2025001	2175000	2092	0.29979	0.189962
1	2100001	2250000	2091	0.331793	0.209388
1	2175001	2325000	2375	0.278222	0.178425
1	2250001	2400000	2449	0.206908	0.140676
1	2325001	2475000	2153	0.160277	0.123368
1	2400001	2550000	2182	0.180877	0.133584
1	2475001	2625000	2475	0.178901	0.130647
1	2550001	2700000	2494	0.140929	0.110376
1	2625001	2775000	2197	0.129457	0.102515
1	2700001	2850000	2160	0.144818	0.105534
1	2775001	2925000	2359	0.152259	0.111951
1	2850001	3000000	2344	0.143647	0.115909
1	2925001	3075000	1216	0.13395	0.111211
1	3000001	3150000	970	0.192272	0.141506
1	3075001	3225000	1760	0.185099	0.136038
1	3150001	3300000	1957	0.167758	0.119859
1	3225001	3375000	2101	0.165473	0.115491
1	3300001	3450000	2184	0.185497	0.127369
1	3375001	3525000	2650	0.19325	0.139169
1	3450001	3600000	3461	0.167658	0.129652
1	3525001	3675000	3189	0.148117	0.115719
1	3600001	3750000	2183	0.208932	0.142653
1	3675001	3825000	2080	0.296685	0.188348
1	3750001	3900000	2408	0.291779	0.187476
1	3825001	3975000	2777	0.242703	0.171785
1	3900001	4050000	2692	0.201033	0.149986
1	3975001	4125000	2402	0.162118	0.121188
1	4050001	4200000	2536	0.141437	0.109445
1	4125001	4275000	2855	0.149061	0.112856
1	4200001	4350000	2177	0.184736	0.134682
1	4275001	4425000	2192	0.217557	0.157429
1	4350001	4500000	2938	0.173199	0.125474
1	4425001	4575000	2994	0.132472	0.103068
1	4500001	4650000	2629	0.167892	0.126234
1	4575001	4725000	2192	0.197295	0.139843
1	4650001	4800000	2508	0.164708	0.121891
1	4725001	4875000	2434	0.211024	0.143085
1	4800001	4950000	2328	0.223669	0.145797
1	4875001	5025000	2199	0.197858	0.131266
1	4950001	5100000	2090	0.189578	0.125248
1	5025001	5175000	2308	0.189253	0.130178
1	5100001	5250000	2411	0.217494	0.150313
1	5175001	5325000	2207	0.221059	0.144178
1	5250001	5400000	2117	0.298629	0.185494
1	5325001	5475000	2253	0.380212	0.237322
1	5400001	5550000	2199	0.369212	0.220565
1	5475001	5625000	2284	0.366724	0.224056
1	5550001	5700000	2601	0.365037	0.237352
1	5625001	5775000	2924	0.267404	0.177773
1	5700001	5850000	3022	0.194581	0.13324
1	5775001	5925000	2904	0.242515	0.156998
1	5850001	6000000	2611	0.271782	0.166746
1	5925001	6075000	2223	0.225142	0.1286
1	6000001	6150000	2340	0.145425	0.0960962
1	6075001	6225000	2755	0.151428	0.110447
1	6150001	6300000	3162	0.20673	0.147037
1	6225001	6375000	3396	0.230771	0.159137
1	6300001	6450000	2197	0.214416	0.145838
1	6375001	6525000	2174	0.212533	0.143922
1	6450001	6600000	2876	0.227127	0.147829
1	6525001	6675000	2673	0.278484	0.169307
1	6600001	6750000	2771	0.279959	0.173118
1	6675001	6825000	2697	0.267891	0.167867
1	6750001	6900000	2732	0.250932	0.160209
1	6825001	6975000	2244	0.187658	0.132191
1	6900001	7050000	1717	0.200351	0.134933
1	6975001	7125000	1759	0.194393	0.124645
1	7050001	7200000	2493	0.164844	0.116833
1	7125001	7275000	2972	0.160592	0.114957
1	7200001	7350000	2778	0.170181	0.1242
1	7275001	7425000	2375	0.204659	0.150133
1	7350001	7500000	2476	0.241	0.171403
1	7425001	7575000	2186	0.259067	0.188535
1	7500001	7650000	1580	0.236864	0.176068
1	7575001	7725000	1011	0.212475	0.156299
1	7650001	7800000	689	0.255405	0.174353
1	7725001	7875000	970	0.237816	0.173893
1	7800001	7950000	1180	0.327397	0.222553
1	7875001	8025000	1908	0.258944	0.175822
1	7950001	8100000	1891	0.156381	0.115448
1	8025001	8175000	1806	0.163769	0.120245
1	8100001	8250000	2350	0.175343	0.13008
1	8175001	8325000	2053	0.166491	0.120687
1	8250001	8400000	1367	0.130664	0.0935869
1	8325001	8475000	1531	0.154043	0.109479
1	8400001	8550000	1273	0.225371	0.159882
1	8475001	8625000	1585	0.224856	0.154801
1	8550001	8700000	2582	0.199619	0.140949
1	8625001	8775000	2686	0.184911	0.135501
1	8700001	8850000	2631	0.174896	0.137827
1	8775001	8925000	2729	0.175585	0.140383
1	8850001	9000000	2600	0.158869	0.122817
1	8925001	9075000	2325	0.15896	0.121436
1	9000001	9150000	2347	0.156014	0.116253
1	9075001	9225000	1974	0.142809	0.106502
1	9150001	9300000	2009	0.243428	0.162374
1	9225001	9375000	2167	0.25298	0.165344
1	9300001	9450000	1872	0.1476	0.109676
1	9375001	9525000	1542	0.120907	0.0961934
1	9450001	9600000	860	0.150593	0.108472
1	9525001	9675000	867	0.164861	0.121812
1	9600001	9750000	1881	0.17919	0.133214
1	9675001	9825000	2176	0.187304	0.14035
1	9750001	9900000	1757	0.168084	0.130705
1	9825001	9975000	2091	0.163516	0.11778
1	9900001	10050000	2485	0.203259	0.136288
1	9975001	10125000	2210	0.19088	0.131249
1	10050001	10200000	2257	0.128052	0.101535
1	10125001	10275000	2120	0.129295	0.101623
1	10200001	10350000	1761	0.13489	0.0993833
1	10275001	10425000	1606	0.21199	0.143615
1	10350001	10500000	1373	0.290135	0.187224
1	10425001	10575000	1221	0.268449	0.175961
1	10500001	10650000	991	0.185512	0.139734
1	10575001	10725000	589	0.140183	0.102341
1	10650001	10800000	534	0.218617	0.152147
1	10725001	10875000	1176	0.162605	0.124782
1	10800001	10950000	1425	0.143043	0.112055
1	10875001	11025000	1685	0.141484	0.109235
1	10950001	11100000	1851	0.133987	0.107437
1	11025001	11175000	1601	0.169878	0.125699
1	11100001	11250000	1232	0.21906	0.150287
1	11175001	11325000	985	0.198153	0.143816
1	11250001	11400000	933	0.182784	0.124218
1	11325001	11475000	1109	0.196318	0.126874
1	11400001	11550000	1278	0.1826	0.136199
1	11475001	11625000	1253	0.183822	0.139831
1	11550001	11700000	1713	0.168827	0.128094
1	11625001	11775000	2172	0.176057	0.131817
1	11700001	11850000	2101	0.191388	0.129545
1	11775001	11925000	2006	0.161976	0.11245
1	11850001	12000000	2003	0.195179	0.135455
1	11925001	12075000	1990	0.284302	0.189909
1	12000001	12150000	2013	0.241048	0.169769
1	12075001	12225000	2038	0.19984	0.143391
1	12150001	12300000	1930	0.17452	0.126472
1	12225001	12375000	1960	0.125709	0.105883
1	12300001	12450000	2067	0.15356	0.122933
1	12375001	12525000	1882	0.155412	0.119745
1	12450001	12600000	1109	0.14986	0.114289
1	12525001	12675000	635	0.272804	0.17304
1	12600001	12750000	1538	0.219197	0.150201
1	12675001	12825000	1722	0.175141	0.12851
1	12750001	12900000	1307	0.193926	0.139447
1	12825001	12975000	1638	0.16864	0.122721
1	12900001	13050000	1920	0.151803	0.111459
1	12975001	13125000	1516	0.178414	0.129084
1	13050001	13200000	1223	0.29165	0.182281
1	13125001	13275000	882	0.321899	0.198114
1	13200001	13350000	395	0.178947	0.12415
1	13275001	13425000	883	0.243478	0.154182
1	13350001	13500000	1480	0.249766	0.156279
1	13425001	13575000	1652	0.274536	0.168644
1	13500001	13650000	1775	0.234689	0.144041
1	13575001	13725000	2000	0.220203	0.137006
1	13650001	13800000	1975	0.265962	0.163507
1	13725001	13875000	1751	0.2433	0.156119
1	13800001	13950000	1897	0.227514	0.159636
1	13875001	14025000	2004	0.194502	0.136152
1	13950001	14100000	2147	0.164801	0.119443
1	14025001	14175000	2056	0.154352	0.117431
1	14100001	14250000	2074	0.126535	0.0997862
1	14175001	14325000	2024	0.14187	0.108267
1	14250001	14400000	1379	0.179338	0.127728
1	14325001	14475000	1416	0.299354	0.193602
1	14400001	14550000	1799	0.288524	0.203199
1	14475001	14625000	1504	0.215138	0.168624
1	14550001	14700000	1108	0.203064	0.146806
1	14625001	14775000	1188	0.219623	0.158543
1	14700001	14850000	1445	0.283946	0.203403
1	14775001	14925000	1714	0.24588	0.166332
1	14850001	15000000	1569	0.151135	0.115046
1	14925001	15075000	1292	0.182102	0.13965
1	15000001	15150000	1383	0.196177	0.141989
1	15075001	15225000	1482	0.178738	0.116093
1	15150001	15300000	1253	0.201629	0.123783
1	15225001	15375000	1114	0.209297	0.138231
1	15300001	15450000	1293	0.166084	0.119786
1	15375001	15525000	1474	0.149261	0.113435
1	15450001	15600000	1640	0.159867	0.113215
1	15525001	15675000	1817	0.145918	0.108356
1	15600001	15750000	1782	0.193157	0.137385
1	15675001	15825000	1537	0.252668	0.175478
1	15750001	15900000	1304	0.219296	0.156064
1	15825001	15975000	1366	0.17174	0.127081
1	15900001	16050000	1538	0.18975	0.130897
1	15975001	16125000	1496	0.17453	0.11528
1	16050001	16200000	1356	0.172456	0.123603
1	16125001	16275000	1411	0.193062	0.140574
1	16200001	16350000	1208	0.160404	0.116715
1	16275001	16425000	1281	0.154131	0.112247
1	16350001	16500000	1550	0.196191	0.136968
1	16425001	16575000	1350	0.184282	0.128699
1	16500001	16650000	1381	0.121501	0.0988852
1	16575001	16725000	1341	0.151947	0.116622
1	16650001	16800000	1500	0.219199	0.152836
1	16725001	16875000	1789	0.260362	0.184625
1	16800001	16950000	1736	0.23053	0.167158
1	16875001	17025000	1828	0.164929	0.128492
1	16950001	17100000	1928	0.137848	0.110145
1	17025001	17175000	1933	0.158937	0.123574
1	17100001	17250000	1907	0.238396	0.164352
1	17175001	17325000	1699	0.253306	0.166483
1	17250001	17400000	1331	0.231263	0.155528
1	17325001	17475000	1147	0.298167	0.186157
1	17400001	17550000	1735	0.292459	0.196902
1	17475001	17625000	2214	0.224967	0.161564
1	17550001	17700000	2472	0.242857	0.165934
1	17625001	17775000	2382	0.274204	0.185972
1	17700001	17850000	1765	0.222571	0.147536
1	17775001	17925000	1743	0.161568	0.116967
1	17850001	18000000	1696	0.209497	0.154999
1	17925001	18075000	1850	0.236171	0.168003
1	18000001	18150000	2266	0.182289	0.138756
1	18075001	18225000	2609	0.164311	0.126532
1	18150001	18300000	3002	0.148474	0.112851
1	18225001	18375000	2900	0.134528	0.104163
1	18300001	18450000	2573	0.136413	0.102634
1	18375001	18525000	2372	0.104639	0.0862961
1	18450001	18600000	1995	0.104776	0.0916922
1	18525001	18675000	1270	0.164262	0.129375
1	18600001	18750000	1037	0.222414	0.155647
1	18675001	18825000	1414	0.210852	0.15486
1	18750001	18900000	1557	0.191842	0.141207
1	18825001	18975000	1669	0.212302	0.150556
1	18900001	19050000	2010	0.171563	0.128735
1	18975001	19125000	1880	0.115619	0.0949518
1	19050001	19200000	1659	0.124517	0.107893
1	19125001	19275000	1290	0.138664	0.121765
1	19200001	19350000	1207	0.145816	0.118013
1	19275001	19425000	1416	0.16982	0.116516
1	19350001	19500000	1272	0.22706	0.138896
1	19425001	19575000	1267	0.18769	0.140455
1	19500001	19650000	1435	0.126833	0.108194
1	19575001	19725000	1645	0.136913	0.106243
1	19650001	19800000	1869	0.154265	0.117216
1	19725001	19875000	1740	0.145731	0.110383
1	19800001	19950000	1223	0.155256	0.108981
1	19875001	20025000	941	0.187951	0.132503
1	19950001	20100000	552	0.191418	0.139433
1	20025001	20175000	646	0.21269	0.119511
1	20100001	20250000	1201	0.295349	0.175656
1	20175001	20325000	1061	0.340641	0.202681
1	20250001	20400000	851	0.274653	0.143955
1	20325001	20475000	1316	0.158228	0.106511
1	20400001	20550000	1605	0.160006	0.114569
1	20475001	20625000	1528	0.201014	0.144819
1	20550001	20700000	1144	0.210306	0.147593
1	20625001	20775000	1085	0.231284	0.162123
1	20700001	20850000	1289	0.217822	0.16001
1	20775001	20925000	910	0.163133	0.13082
1	20850001	21000000	844	0.177174	0.15376
1	20925001	21075000	1303	0.211228	0.170444
1	21000001	21150000	1491	0.241469	0.177734
1	21075001	21225000	1573	0.377023	0.233965
1	21150001	21300000	1439	0.430425	0.257789
1	21225001	21375000	1000	0.374152	0.227224
1	21300001	21450000	1158	0.352836	0.227243
1	21375001	21525000	1206	0.358213	0.21715
1	21450001	21600000	708	0.307909	0.172743
1	21525001	21675000	669	0.177411	0.122328
1	21600001	21750000	1007	0.159093	0.128166
1	21675001	21825000	1160	0.189443	0.13701
1	21750001	21900000	1258	0.211892	0.149283
1	21825001	21975000	1306	0.202579	0.155322
1	21900001	22050000	1397	0.256363	0.176811
1	21975001	22125000	1616	0.387038	0.27029
1	22050001	22200000	1879	0.355594	0.250012
1	22125001	22275000	1882	0.312843	0.203882
1	22200001	22350000	1650	0.310526	0.199054
1	22275001	22425000	1341	0.274737	0.187639
1	22350001	22500000	1094	0.247525	0.179853
1	22425001	22575000	1187	0.250806	0.179145
1	22500001	22650000	1263	0.305155	0.195401
1	22575001	22725000	1249	0.316118	0.180948
1	22650001	22800000	1474	0.233046	0.156941
1	22725001	22875000	1624	0.138339	0.116057
1	22800001	22950000	1759	0.164308	0.125088
1	22875001	23025000	1670	0.164726	0.127972
1	22950001	23100000	1666	0.149109	0.119261
1	23025001	23175000	1792	0.23695	0.165281
1	23100001	23250000	1901	0.279412	0.185514
1	23175001	23325000	2282	0.197609	0.14538
1	23250001	23400000	2674	0.159765	0.128728
1	23325001	23475000	2782	0.158511	0.129579
1	23400001	23550000	2225	0.156406	0.12389
1	23475001	23625000	1832	0.184173	0.135557
1	23550001	23700000	2067	0.220695	0.165771
1	23625001	23775000	2277	0.207857	0.152162
1	23700001	23850000	2338	0.16709	0.132204
1	23775001	23925000	2105	0.187125	0.145847
1	23850001	24000000	1846	0.242475	0.169592
1	23925001	24075000	1858	0.22516	0.155385
1	24000001	24150000	1856	0.177468	0.132139
1	24075001	24225000	1693	0.186621	0.14017
1	24150001	24300000	1673	0.152591	0.123301
1	24225001	24375000	1716	0.15406	0.124834
1	24300001	24450000	1350	0.197669	0.151227
1	24375001	24525000	788	0.217557	0.130375
1	24450001	24600000	540	0.260458	0.153441
1	24525001	24675000	341	0.278746	0.218061
1	24600001	24750000	522	0.188821	0.143695
1	24675001	24825000	803	0.170201	0.125247
1	24750001	24900000	581	0.18399	0.128018
1	24825001	24975000	734	0.214108	0.163639
1	24900001	25050000	478	0.206448	0.159458
1	24975001	25125000	26	0.29956	0.204763
1	25050001	25200000	388	0.134035	0.098077
1	25125001	25275000	1187	0.194838	0.130209
1	25200001	25350000	1994	0.238113	0.164212
1	25275001	25425000	2869	0.180555	0.128014
1	25350001	25500000	3882	0.135591	0.0970045
1	25425001	25575000	4853	0.139059	0.101688
1	25500001	25650000	3229	0.154005	0.11107
1	25575001	25725000	999	0.198096	0.125726
1	25650001	25800000	914	0.225474	0.145509
1	25725001	25875000	1143	0.297333	0.215479
1	25800001	25950000	979	0.260903	0.184084
1	25875001	26025000	660	0.124377	0.0930417
1	25950001	26100000	949	0.133367	0.095252
1	26025001	26175000	1248	0.131803	0.098146
1	26100001	26250000	1269	0.180887	0.133506
1	26175001	26325000	1102	0.25893	0.16363
1	26250001	26400000	958	0.247233	0.149847
1	26325001	26475000	895	0.169975	0.132415
1	26400001	26550000	959	0.14519	0.123844
1	26475001	26625000	943	0.155119	0.116059
1	26550001	26700000	921	0.19285	0.122155
1	26625001	26775000	936	0.217959	0.153905
1	26700001	26850000	898	0.246306	0.183437
1	26775001	26925000	924	0.243404	0.174303
1	26850001	27000000	928	0.235508	0.169873
1	26925001	27075000	937	0.239602	0.169136
1	27000001	27150000	771	0.238708	0.155716
1	27075001	27225000	980	0.175278	0.121004
1	27150001	27300000	1121	0.172522	0.120776
1	27225001	27375000	1080	0.271113	0.195687
1	27300001	27450000	1126	0.221444	0.176904
1	27375001	27525000	1051	0.107161	0.102702
1	27450001	27600000	1023	0.133802	0.11622
1	27525001	27675000	1092	0.212498	0.156743
1	27600001	27750000	1117	0.347708	0.226443
1	27675001	27825000	703	0.417086	0.255245
1	27750001	27900000	435	0.253131	0.163341
1	27825001	27975000	487	0.1825	0.12648
1	27900001	28050000	851	0.121779	0.101357
1	27975001	28125000	1053	0.137927	0.113644
1	28050001	28200000	1193	0.152465	0.122282
1	28125001	28275000	1420	0.179932	0.137489
1	28200001	28350000	1190	0.200373	0.155847
1	28275001	28425000	927	0.160185	0.130518
1	28350001	28500000	626	0.129081	0.110813
1	28425001	28575000	412	0.125587	0.109901
1	28500001	28650000	799	0.22701	0.149129
1	28575001	28725000	1245	0.216148	0.143849
1	28650001	28800000	1304	0.157209	0.119434
1	28725001	28875000	1252	0.132914	0.1139
1	28800001	28950000	1489	0.0971505	0.0858675
1	28875001	29025000	2007	0.110518	0.0935862
1	28950001	29100000	1649	0.191029	0.143242
1	29025001	29175000	1494	0.239157	0.161388
1	29100001	29250000	1718	0.214032	0.151446
1	29175001	29325000	1533	0.226461	0.160631
1	29250001	29400000	1049	0.324601	0.201081
1	29325001	29475000	865	0.484943	0.289902
1	29400001	29550000	1404	0.357119	0.21306
1	29475001	29625000	1512	0.238333	0.161812
1	29550001	29700000	1330	0.265207	0.191362
1	29625001	29775000	1289	0.309488	0.212279
1	29700001	29850000	1378	0.236418	0.164635
1	29775001	29925000	1209	0.178507	0.139524
1	29850001	30000000	1332	0.123369	0.100894
1	29925001	30075000	1741	0.168691	0.125745
1	30000001	30150000	1680	0.229933	0.163267
1	30075001	30225000	1479	0.215609	0.147988
1	30150001	30300000	1688	0.201632	0.144188
1	30225001	30375000	1674	0.187683	0.141535
1	30300001	30450000	1210	0.176687	0.140458
1	30375001	30525000	1049	0.192624	0.146536
1	30450001	30600000	1238	0.169257	0.120189
1	30525001	30675000	1425	0.143738	0.106612
1	30600001	30750000	1931	0.145807	0.113496
1	30675001	30825000	2428	0.310142	0.196814
1	30750001	30900000	1955	0.335233	0.215124
1	30825001	30975000	1581	0.141993	0.113486
1	30900001	31050000	1957	0.160895	0.120488
1	30975001	31125000	1770	0.175079	0.126061
1	31050001	31200000	1372	0.197691	0.143943
1	31125001	31275000	1768	0.193375	0.133839
1	31200001	31350000	1996	0.143304	0.103545
1	31275001	31425000	1968	0.190658	0.138376
1	31350001	31500000	1971	0.255542	0.188714
1	31425001	31575000	1737	0.254295	0.178011
1	31500001	31650000	1432	0.251667	0.162913
1	31575001	31725000	1508	0.16733	0.123461
1	31650001	31800000	1771	0.128018	0.107641
1	31725001	31875000	2106	0.156049	0.120485
1	31800001	31950000	2069	0.164586	0.118735
1	31875001	32025000	1824	0.154489	0.114601
1	31950001	32100000	1847	0.192108	0.133455
1	32025001	32175000	1914	0.173125	0.122139
1	32100001	32250000	2135	0.103449	0.0906285
1	32175001	32325000	2099	0.176553	0.127936
1	32250001	32400000	1709	0.241608	0.163439
1	32325001	32475000	1771	0.194235	0.142343
1	32400001	32550000	1978	0.190437	0.146784
1	32475001	32625000	1786	0.201568	0.146904
1	32550001	32700000	1565	0.147238	0.11441
1	32625001	32775000	1555	0.204621	0.153074
1	32700001	32850000	2065	0.179516	0.136722
1	32775001	32925000	2237	0.111961	0.0950545
1	32850001	33000000	2439	0.119782	0.0979275
1	32925001	33075000	2580	0.122143	0.101297
1	33000001	33150000	2432	0.152828	0.118452
1	33075001	33225000	2335	0.184307	0.140919
1	33150001	33300000	2108	0.184115	0.141017
1	33225001	33375000	2120	0.166699	0.125096
1	33300001	33450000	2155	0.15298	0.113597
1	33375001	33525000	2361	0.144415	0.109546
1	33450001	33600000	2359	0.164422	0.121239
1	33525001	33675000	2332	0.182609	0.130324
1	33600001	33750000	2283	0.212127	0.145042
1	33675001	33825000	2088	0.254727	0.170053
1	33750001	33900000	2016	0.19355	0.134254
1	33825001	33975000	2157	0.114107	0.0930957
1	33900001	34050000	2419	0.163652	0.125311
1	33975001	34125000	2461	0.186433	0.1405
1	34050001	34200000	2181	0.243414	0.167347
1	34125001	34275000	2064	0.297039	0.194907
1	34200001	34350000	2132	0.245918	0.167224
1	34275001	34425000	2381	0.185113	0.140112
1	34350001	34500000	2329	0.141446	0.115373
1	34425001	34575000	1970	0.128555	0.106579
1	34500001	34650000	2126	0.15645	0.122303
1	34575001	34725000	2495	0.137045	0.108266
1	34650001	34800000	2506	0.120958	0.101293
1	34725001	34875000	2206	0.102809	0.0882336
1	34800001	34950000	2082	0.122746	0.0973321
1	34875001	35025000	1636	0.190353	0.134919
1	34950001	35100000	1445	0.202874	0.150661
1	35025001	35175000	1375	0.1916	0.153673
1	35100001	35250000	1286	0.16265	0.124678
1	35175001	35325000	1570	0.161971	0.107399
1	35250001	35400000	1777	0.168845	0.11456
1	35325001	35475000	1935	0.128072	0.100822
1	35400001	35550000	1736	0.121506	0.0929878
1	35475001	35625000	1408	0.193708	0.131042
1	35550001	35700000	2069	0.264855	0.170456
1	35625001	35775000	1906	0.29455	0.190091
1	35700001	35850000	643	0.293323	0.193679
1	35775001	35925000	883	0.127116	0.104093
1	35850001	36000000	1684	0.135334	0.114867
1	35925001	36075000	1784	0.149514	0.126953
1	36000001	36150000	1541	0.200655	0.153658
1	36075001	36225000	1733	0.172651	0.139887
1	36150001	36300000	1521	0.138013	0.117344
1	36225001	36375000	1173	0.180352	0.129622
1	36300001	36450000	1369	0.147499	0.110515
1	36375001	36525000	1725	0.110306	0.0847402
1	36450001	36600000	2100	0.174006	0.121545
1	36525001	36675000	2358	0.213439	0.160516
1	36600001	36750000	2008	0.280117	0.203208
1	36675001	36825000	1610	0.289379	0.19655
1	36750001	36900000	1914	0.169846	0.128649
1	36825001	36975000	2215	0.135197	0.110735
1	36900001	37050000	2298	0.113515	0.0964923
1	36975001	37125000	2065	0.111499	0.0988027
1	37050001	37200000	1903	0.159013	0.131631
1	37125001	37275000	1968	0.169974	0.129612
1	37200001	37350000	1882	0.151362	0.117841
1	37275001	37425000	941	0.178515	0.138886
1	37350001	37500000	345	0.251583	0.166143
1	37425001	37575000	1269	0.19799	0.137848
1	37500001	37650000	2228	0.140714	0.111412
1	37575001	37725000	1971	0.0954967	0.0755253
1	37650001	37800000	1982	0.0780087	0.0574701
1	37725001	37875000	2352	0.144844	0.105451
1	37800001	37950000	2078	0.172883	0.132804
1	37875001	38025000	1613	0.196282	0.135785
1	37950001	38100000	1729	0.208457	0.140678
1	38025001	38175000	1722	0.167424	0.122087
1	38100001	38250000	1105	0.207609	0.144199
1	38175001	38325000	949	0.212894	0.155229
1	38250001	38400000	1004	0.146354	0.123218
1	38325001	38475000	1120	0.172786	0.141317
1	38400001	38550000	1523	0.200033	0.157711
1	38475001	38625000	1704	0.18868	0.14919
1	38550001	38700000	1633	0.280895	0.183698
1	38625001	38775000	1696	0.25471	0.159893
1	38700001	38850000	1727	0.180003	0.13175
1	38775001	38925000	1600	0.224933	0.161617
1	38850001	39000000	1664	0.21846	0.1529
1	38925001	39075000	1883	0.206568	0.14866
1	39000001	39150000	2250	0.205157	0.153075
1	39075001	39225000	2325	0.264937	0.18046
1	39150001	39300000	1136	0.308465	0.201591
1	39225001	39375000	1354	0.163179	0.120829
1	39300001	39450000	1802	0.194619	0.134359
1	39375001	39525000	1110	0.224352	0.13151
1	39450001	39600000	1859	0.197353	0.114987
1	39525001	39675000	2269	0.187532	0.114246
1	39600001	39750000	1717	0.204394	0.134014
1	39675001	39825000	1659	0.255433	0.170642
1	39750001	39900000	1510	0.259221	0.163398
1	39825001	39975000	1070	0.330341	0.194048
1	39900001	40050000	1416	0.374994	0.212576
1	39975001	40125000	1798	0.378445	0.231624
1	40050001	40200000	1621	0.355105	0.230795
1	40125001	40275000	1651	0.248479	0.165843
1	40200001	40350000	1714	0.222319	0.154847
1	40275001	40425000	1770	0.251571	0.172696
1	40350001	40500000	2005	0.217424	0.156188
1	40425001	40575000	1931	0.164064	0.121898
1	40500001	40650000	1734	0.127883	0.102277
1	40575001	40725000	1746	0.16245	0.127594
1	40650001	40800000	1569	0.221459	0.143948
1	40725001	40875000	1436	0.211046	0.123864
1	40800001	40950000	1611	0.205369	0.140207
1	40875001	41025000	1536	0.217084	0.15536
1	40950001	41100000	1238	0.175293	0.124949
1	41025001	41175000	1387	0.207612	0.140265
1	41100001	41250000	1430	0.256845	0.177008
1	41175001	41325000	1527	0.22583	0.155863
1	41250001	41400000	1835	0.201597	0.141556
1	41325001	41475000	2048	0.206376	0.147914
1	41400001	41550000	1881	0.204323	0.139986
1	41475001	41625000	1522	0.260043	0.166512
1	41550001	41700000	1638	0.369632	0.225876
1	41625001	41775000	1659	0.387863	0.238027
1	41700001	41850000	1744	0.311677	0.200711
1	41775001	41925000	1774	0.250676	0.160216
1	41850001	42000000	1322	0.207986	0.1346
1	41925001	42075000	1235	0.220251	0.152028
1	42000001	42150000	1561	0.233831	0.163501
1	42075001	42225000	1618	0.249195	0.171719
1	42150001	42300000	1770	0.236958	0.166826
1	42225001	42375000	1681	0.265619	0.173261
1	42300001	42450000	1336	0.293475	0.192059
1	42375001	42525000	1497	0.213458	0.158209
1	42450001	42600000	1743	0.202683	0.151458
1	42525001	42675000	1597	0.191039	0.142114
1	42600001	42750000	1496	0.167164	0.120119
1	42675001	42825000	1577	0.209414	0.147013
1	42750001	42900000	1501	0.245255	0.181331
1	42825001	42975000	1548	0.233694	0.170461
1	42900001	43050000	1745	0.194042	0.146597
1	42975001	43125000	1682	0.259666	0.173927
1	43050001	43200000	1587	0.345727	0.210555
1	43125001	43275000	1291	0.304071	0.194304
1	43200001	43350000	595	0.261238	0.172565
1	43275001	43425000	175	0.286286	0.178507
1	43350001	43500000	238	0.232719	0.145899
1	43425001	43575000	551	0.28071	0.176899
1	43500001	43650000	1401	0.260925	0.178458
1	43575001	43725000	1838	0.214174	0.150357
1	43650001	43800000	1776	0.196954	0.13073
1	43725001	43875000	2080	0.232334	0.148256
1	43800001	43950000	2322	0.254531	0.174063
1	43875001	44025000	2431	0.241644	0.169056
1	43950001	44100000	2158	0.217867	0.145759
1	44025001	44175000	1838	0.199907	0.136615
1	44100001	44250000	1362	0.155627	0.114966
1	44175001	44325000	1472	0.160725	0.118219
1	44250001	44400000	2213	0.221337	0.156082
1	44325001	44475000	2004	0.257826	0.178402
1	44400001	44550000	1566	0.241701	0.167312
1	44475001	44625000	1811	0.270252	0.18335
1	44550001	44700000	1915	0.24691	0.167994
1	44625001	44775000	1876	0.181124	0.132737
1	44700001	44850000	1286	0.19897	0.142044
1	44775001	44925000	1020	0.143401	0.111317
1	44850001	45000000	1697	0.128749	0.103683
1	44925001	45075000	2109	0.12315	0.0973046
1	45000001	45150000	1978	0.209297	0.143877
1	45075001	45225000	1712	0.249345	0.172209
1	45150001	45300000	1519	0.157761	0.124481
1	45225001	45375000	1676	0.138747	0.115224
1	45300001	45450000	1973	0.148311	0.120309
1	45375001	45525000	1565	0.138031	0.112909
1	45450001	45600000	1272	0.162467	0.117656
1	45525001	45675000	1275	0.221183	0.151652
1	45600001	45750000	1153	0.188148	0.133103
1	45675001	45825000	1286	0.110158	0.0840706
1	45750001	45900000	1764	0.148901	0.113909
1	45825001	45975000	1787	0.220662	0.158856
1	45900001	46050000	1777	0.184421	0.137606
1	45975001	46125000	1544	0.118583	0.10122
1	46050001	46200000	1720	0.135034	0.106469
1	46125001	46275000	2342	0.150869	0.11919
1	46200001	46350000	1942	0.156967	0.122187
1	46275001	46425000	1406	0.163245	0.122716
1	46350001	46500000	1670	0.154256	0.127275
1	46425001	46575000	1374	0.158517	0.134696
1	46500001	46650000	927	0.20979	0.171072
1	46575001	46725000	831	0.197771	0.157103
1	46650001	46800000	1111	0.158553	0.122301
1	46725001	46875000	2078	0.176302	0.132895
1	46800001	46950000	2138	0.177638	0.133328
1	46875001	47025000	1689	0.163273	0.119996
1	46950001	47100000	1668	0.154502	0.115406
1	47025001	47175000	2054	0.182465	0.128738
1	47100001	47250000	2172	0.18009	0.125385
1	47175001	47325000	2047	0.16261	0.118712
1	47250001	47400000	1699	0.142651	0.106301
1	47325001	47475000	735	0.0961018	0.083654
1	47400001	47550000	119	0.198198	0.140513
1	47475001	47625000	322	0.126431	0.101725
1	47550001	47700000	1129	0.131177	0.101365
1	47625001	47775000	1756	0.179313	0.12799
1	47700001	47850000	1940	0.159354	0.121975
1	47775001	47925000	1777	0.13866	0.110609
1	47850001	48000000	1765	0.179484	0.125785
1	47925001	48075000	1695	0.17182	0.125344
1	48000001	48150000	1881	0.146977	0.124062
1	48075001	48225000	2137	0.130313	0.11196
1	48150001	48300000	1927	0.163628	0.122485
1	48225001	48375000	1587	0.177123	0.131237
1	48300001	48450000	1339	0.153556	0.121365
1	48375001	48525000	1507	0.235352	0.167581
1	48450001	48600000	1198	0.290558	0.192502
1	48525001	48675000	1469	0.321053	0.209209
1	48600001	48750000	1864	0.275515	0.189118
1	48675001	48825000	1964	0.195791	0.144178
1	48750001	48900000	1912	0.27494	0.178898
1	48825001	48975000	1457	0.29565	0.193132
1	48900001	49050000	1651	0.250689	0.187894
1	48975001	49125000	1836	0.262759	0.186786
1	49050001	49200000	2035	0.228964	0.161332
1	49125001	49275000	2330	0.208525	0.161197
1	49200001	49350000	2007	0.175965	0.136118
1	49275001	49425000	1006	0.152461	0.108037
1	49350001	49500000	418	0.180107	0.122184
1	49425001	49575000	698	0.167526	0.12176
1	49500001	49650000	480	0.191323	0.132452
1	49575001	49725000	669	0.206736	0.13775
1	49650001	49800000	1833	0.239962	0.148193
1	49725001	49875000	2254	0.248331	0.161871
1	49800001	49950000	2024	0.185749	0.134455
1	49875001	50025000	1843	0.178597	0.123217
1	49950001	50100000	1808	0.204222	0.133729
1	50025001	50175000	1587	0.190042	0.13068
1	50100001	50250000	1075	0.261653	0.173185
1	50175001	50325000	1497	0.301145	0.202584
1	50250001	50400000	1923	0.286554	0.201255
1	50325001	50475000	1773	0.28545	0.201135
1	50400001	50550000	2142	0.213234	0.15626
1	50475001	50625000	2267	0.175457	0.128958
1	50550001	50700000	1571	0.20837	0.146579
1	50625001	50775000	1081	0.211797	0.161108
1	50700001	50850000	1466	0.230134	0.153243
1	50775001	50925000	2084	0.246463	0.159279
1	50850001	51000000	1658	0.220862	0.148312
1	50925001	51075000	1388	0.150341	0.106541
1	51000001	51150000	1054	0.198601	0.125269
1	51075001	51225000	958	0.333554	0.22196
1	51150001	51300000	1254	0.285771	0.199064
1	51225001	51375000	463	0.247604	0.165837
1	51300001	51450000	610	0.16919	0.122073
1	51375001	51525000	1956	0.15731	0.114465
1	51450001	51600000	2430	0.166791	0.120042
1	51525001	51675000	1842	0.166585	0.126776
1	51600001	51750000	1559	0.213188	0.157446
1	51675001	51825000	1448	0.253187	0.175393
1	51750001	51900000	1587	0.23886	0.173079
1	51825001	51975000	1746	0.203204	0.144681
1	51900001	52050000	1634	0.213813	0.136624
1	51975001	52125000	1689	0.209531	0.139301
1	52050001	52200000	1956	0.119272	0.0944191
1	52125001	52275000	2048	0.132898	0.105621
1	52200001	52350000	2078	0.157432	0.127702
1	52275001	52425000	1939	0.173934	0.134192
1	52350001	52500000	1884	0.174727	0.116168
1	52425001	52575000	2293	0.106038	0.0839948
1	52500001	52650000	1955	0.0888281	0.0762076
1	52575001	52725000	1989	0.118896	0.091328
1	52650001	52800000	2294	0.160207	0.120935
1	52725001	52875000	1767	0.227847	0.166506
1	52800001	52950000	2133	0.239254	0.179089
1	52875001	53025000	2596	0.179551	0.137005
1	52950001	53100000	2322	0.137054	0.10288
1	53025001	53175000	2031	0.180023	0.129891
1	53100001	53250000	1837	0.233331	0.163218
1	53175001	53325000	2127	0.18756	0.143932
1	53250001	53400000	2108	0.110401	0.0955412
1	53325001	53475000	1891	0.100473	0.080353
1	53400001	53550000	2030	0.158693	0.118665
1	53475001	53625000	1605	0.179223	0.130202
1	53550001	53700000	639	0.167414	0.115345
1	53625001	53775000	287	0.146298	0.10689
1	53700001	53850000	732	0.156544	0.123164
1	53775001	53925000	1563	0.243637	0.162682
1	53850001	54000000	1547	0.284037	0.184148
1	53925001	54075000	1551	0.252927	0.182574
1	54000001	54150000	1971	0.218489	0.153917
1	54075001	54225000	1688	0.252318	0.165116
1	54150001	54300000	1640	0.255147	0.163415
1	54225001	54375000	1826	0.223995	0.134405
1	54300001	54450000	2102	0.202994	0.126192
1	54375001	54525000	1956	0.167796	0.110276
1	54450001	54600000	1761	0.226227	0.144918
1	54525001	54675000	1659	0.245274	0.154932
1	54600001	54750000	718	0.215652	0.127415
1	54675001	54825000	283	0.242171	0.126874
1	54750001	54900000	1029	0.251781	0.153993
1	54825001	54975000	1603	0.233272	0.153558
1	54900001	55050000	863	0.213746	0.144104
1	54975001	55125000	409	0.328986	0.182503
1	55050001	55200000	1216	0.307945	0.190725
1	55125001	55275000	1733	0.29949	0.196795
1	55200001	55350000	1472	0.354495	0.218352
1	55275001	55425000	1399	0.40974	0.236229
1	55350001	55500000	1899	0.313591	0.197299
1	55425001	55575000	2005	0.242685	0.168332
1	55500001	55650000	1486	0.205196	0.146907
1	55575001	55725000	1063	0.150761	0.115983
1	55650001	55800000	1510	0.160539	0.126797
1	55725001	55875000	2004	0.236898	0.164277
1	55800001	55950000	1582	0.240979	0.156923
1	55875001	56025000	1294	0.164325	0.116174
1	55950001	56100000	1686	0.202624	0.152258
1	56025001	56175000	1172	0.228831	0.165539
1	56100001	56250000	339	0.252892	0.146208
1	56175001	56325000	680	0.220833	0.147479
1	56250001	56400000	1710	0.137221	0.101621
1	56325001	56475000	2259	0.134782	0.103577
1	56400001	56550000	2026	0.154514	0.117691
1	56475001	56625000	2181	0.162505	0.127803
1	56550001	56700000	2214	0.201354	0.145485
1	56625001	56775000	2086	0.185582	0.129451
1	56700001	56850000	1980	0.162736	0.121951
1	56775001	56925000	2024	0.147796	0.105203
1	56850001	57000000	2435	0.120776	0.0906262
1	56925001	57075000	2626	0.128043	0.101885
1	57000001	57150000	2396	0.153011	0.120261
1	57075001	57225000	2073	0.172759	0.13269
1	57150001	57300000	1893	0.172837	0.13272
1	57225001	57375000	1941	0.182265	0.133756
1	57300001	57450000	2072	0.160102	0.117559
1	57375001	57525000	2193	0.15335	0.117057
1	57450001	57600000	2184	0.17958	0.127924
1	57525001	57675000	2241	0.143969	0.100983
1	57600001	57750000	2216	0.137642	0.10138
1	57675001	57825000	2103	0.149318	0.117929
1	57750001	57900000	2108	0.150072	0.120035
1	57825001	57975000	1941	0.158676	0.125188
1	57900001	58050000	1962	0.186962	0.134565
1	57975001	58125000	2205	0.200506	0.144769
1	58050001	58200000	1617	0.187629	0.13852
1	58125001	58275000	968	0.223194	0.13315
1	58200001	58350000	1303	0.169581	0.104707
1	58275001	58425000	1493	0.11789	0.0868577
1	58350001	58500000	1361	0.10537	0.0893856
1	58425001	58575000	1065	0.120157	0.103186
1	58500001	58650000	1318	0.155065	0.1222
1	58575001	58725000	2034	0.140356	0.0969634
1	58650001	58800000	2427	0.151176	0.102987
1	58725001	58875000	2223	0.241878	0.165536
1	58800001	58950000	2485	0.289679	0.198368
1	58875001	59025000	2566	0.273237	0.18375
1	58950001	59100000	2239	0.25789	0.182189
1	59025001	59175000	2044	0.236574	0.176148
1	59100001	59250000	1721	0.4628	0.308234
1	59175001	59325000	1824	0.414253	0.268173
1	59250001	59400000	1866	0.185447	0.134356
1	59325001	59475000	1880	0.196298	0.138005
1	59400001	59550000	1891	0.214742	0.150913
1	59475001	59625000	1797	0.237712	0.170745
1	59550001	59700000	1999	0.231031	0.158276
1	59625001	59775000	2514	0.205784	0.141028
1	59700001	59850000	2718	0.218923	0.160885
1	59775001	59925000	2512	0.229211	0.174479
1	59850001	60000000	2279	0.161598	0.124531
1	59925001	60075000	2283	0.123144	0.095351
1	60000001	60150000	2506	0.154179	0.116086
1	60075001	60225000	2488	0.170775	0.128111
1	60150001	60300000	2273	0.207641	0.147538
1	60225001	60375000	1974	0.272593	0.186661
1	60300001	60450000	1693	0.281114	0.17474
1	60375001	60525000	1991	0.284598	0.18135
1	60450001	60600000	2209	0.327942	0.212682
1	60525001	60675000	2125	0.27253	0.178334
1	60600001	60750000	2274	0.144229	0.110265
1	60675001	60825000	2610	0.118452	0.0942769
1	60750001	60900000	2764	0.136931	0.107998
1	60825001	60975000	2367	0.136025	0.106902
1	60900001	61050000	2111	0.104754	0.087666
1	60975001	61125000	2176	0.0949258	0.0844831
1	61050001	61200000	2102	0.108678	0.0915718
1	61125001	61275000	1886	0.147403	0.122739
1	61200001	61350000	1751	0.139754	0.116924
1	61275001	61425000	1638	0.111116	0.0939111
1	61350001	61500000	1758	0.130166	0.103268
1	61425001	61575000	2018	0.134053	0.102722
1	61500001	61650000	2180	0.111754	0.0888496
1	61575001	61725000	2082	0.106867	0.0850939
1	61650001	61800000	1766	0.224469	0.14942
1	61725001	61875000	1915	0.241936	0.170188
1	61800001	61950000	2117	0.172849	0.125474
1	61875001	62025000	1905	0.201365	0.139267
1	61950001	62100000	1991	0.22296	0.152298
1	62025001	62175000	2108	0.199274	0.136362
1	62100001	62250000	1751	0.164039	0.128685
1	62175001	62325000	1313	0.134415	0.112144
1	62250001	62400000	1275	0.119488	0.10094
1	62325001	62475000	1716	0.132178	0.107296
1	62400001	62550000	1740	0.152885	0.113504
1	62475001	62625000	1232	0.177626	0.125181
1	62550001	62700000	1145	0.182359	0.123128
1	62625001	62775000	1268	0.19656	0.129414
1	62700001	62850000	946	0.276405	0.181747
1	62775001	62925000	976	0.417323	0.236651
1	62850001	63000000	1516	0.368973	0.205384
1	62925001	63075000	1510	0.243637	0.14568
1	63000001	63150000	710	0.12487	0.0936448
1	63075001	63225000	1170	0.161799	0.111197
1	63150001	63300000	1902	0.17673	0.128786
1	63225001	63375000	2076	0.207299	0.155207
1	63300001	63450000	2295	0.195424	0.14349
1	63375001	63525000	2039	0.186934	0.139765
1	63450001	63600000	1088	0.205668	0.154829
1	63525001	63675000	550	0.146044	0.111759
1	63600001	63750000	1236	0.134865	0.104935
1	63675001	63825000	1532	0.169901	0.128301
1	63750001	63900000	1772	0.172566	0.1276
1	63825001	63975000	1920	0.127822	0.0983278
1	63900001	64050000	919	0.104388	0.0878258
1	63975001	64125000	656	0.308287	0.199148
1	64050001	64200000	1615	0.246895	0.167901
1	64125001	64275000	2275	0.19372	0.143808
1	64200001	64350000	2569	0.213442	0.148129
1	64275001	64425000	2363	0.211455	0.146441
1	64350001	64500000	2277	0.177264	0.127779
1	64425001	64575000	1860	0.145179	0.107489
1	64500001	64650000	827	0.108959	0.0916467
1	64575001	64725000	240	0.247868	0.173656
1	64650001	64800000	1036	0.284865	0.20232
1	64725001	64875000	2366	0.222235	0.164477
1	64800001	64950000	2368	0.166007	0.131577
1	64875001	65025000	1796	0.149629	0.113174
1	64950001	65100000	1883	0.146878	0.108983
1	65025001	65175000	2021	0.147762	0.114328
1	65100001	65250000	1955	0.143809	0.112749
1	65175001	65325000	1738	0.127758	0.108335
1	65250001	65400000	1909	0.149353	0.122376
1	65325001	65475000	2107	0.167029	0.125746
1	65400001	65550000	1979	0.153579	0.107391
1	65475001	65625000	2210	0.144438	0.107218
1	65550001	65700000	1861	0.172926	0.123575
1	65625001	65775000	1024	0.207905	0.122656
1	65700001	65850000	1063	0.246571	0.156562
1	65775001	65925000	1661	0.192448	0.139196
1	65850001	66000000	1919	0.141589	0.116006
1	65925001	66075000	1693	0.127314	0.106589
1	66000001	66150000	1584	0.12385	0.1004
1	66075001	66225000	1927	0.296257	0.185639
1	66150001	66300000	2036	0.307753	0.197621
1	66225001	66375000	2013	0.141109	0.122534
1	66300001	66450000	2044	0.164006	0.124866
1	66375001	66525000	1894	0.264865	0.17069
1	66450001	66600000	1781	0.229914	0.155138
1	66525001	66675000	1887	0.127124	0.102933
1	66600001	66750000	2023	0.137608	0.107834
1	66675001	66825000	1700	0.150786	0.11713
1	66750001	66900000	1652	0.192883	0.134581
1	66825001	66975000	1941	0.221627	0.153492
1	66900001	67050000	1708	0.244044	0.168079
1	66975001	67125000	1799	0.249413	0.167092
1	67050001	67200000	1893	0.188575	0.130141
1	67125001	67275000	1413	0.16245	0.124443
1	67200001	67350000	1522	0.172869	0.138687
1	67275001	67425000	2346	0.113315	0.0906189
1	67350001	67500000	2247	0.102048	0.0794652
1	67425001	67575000	1992	0.177953	0.124208
1	67500001	67650000	2145	0.192388	0.139009
1	67575001	67725000	2199	0.125048	0.0985822
1	67650001	67800000	2545	0.0919414	0.0720945
1	67725001	67875000	2403	0.128501	0.0902487
1	67800001	67950000	2201	0.179043	0.123416
1	67875001	68025000	1898	0.190952	0.135785
1	67950001	68100000	1626	0.208221	0.147631
1	68025001	68175000	1669	0.184026	0.135024
1	68100001	68250000	1884	0.203069	0.15899
1	68175001	68325000	2102	0.23762	0.185497
1	68250001	68400000	1856	0.253299	0.192466
1	68325001	68475000	1608	0.286683	0.222262
1	68400001	68550000	1355	0.357723	0.246184
1	68475001	68625000	1306	0.363068	0.212504
1	68550001	68700000	1403	0.299424	0.192846
1	68625001	68775000	1528	0.249549	0.179665
1	68700001	68850000	1520	0.199573	0.151826
1	68775001	68925000	1459	0.184145	0.13478
1	68850001	69000000	1451	0.145811	0.110174
1	68925001	69075000	1125	0.182677	0.126181
1	69000001	69150000	1088	0.16768	0.12002
1	69075001	69225000	662	0.125896	0.101887
1	69150001	69300000	166	0.190368	0.144733
1	69225001	69375000	559	0.155524	0.125363
1	69300001	69450000	1207	0.163845	0.124484
1	69375001	69525000	1592	0.185002	0.134154
1	69450001	69600000	1414	0.336174	0.214295
1	69525001	69675000	1123	0.360133	0.211547
1	69600001	69750000	1055	0.131559	0.105158
1	69675001	69825000	1233	0.133783	0.106612
1	69750001	69900000	1765	0.133577	0.10799
1	69825001	69975000	2211	0.126659	0.0972768
1	69900001	70050000	2045	0.12971	0.0928154
1	69975001	70125000	3103	0.0945403	0.04499
1	70050001	70200000	5089	0.157265	0.0800658
1	70125001	70275000	4656	0.202961	0.12566
1	70200001	70350000	3886	0.201607	0.129635
1	70275001	70425000	2406	0.18678	0.119642
1	70350001	70500000	911	0.0322691	0.025886
1	70425001	70575000	1283	0.104548	0.0513713
1	70500001	70650000	2847	0.130167	0.062512
1	70575001	70725000	3270	0.108385	0.0667598
1	70650001	70800000	1824	0.14956	0.112873
1	70725001	70875000	1684	0.170087	0.129482
1	70800001	70950000	1767	0.141414	0.111753
1	70875001	71025000	1761	0.210679	0.134102
1	70950001	71100000	1816	0.253426	0.167441
1	71025001	71175000	1676	0.211121	0.151932
1	71100001	71250000	1582	0.137161	0.100583
1	71175001	71325000	1718	0.100748	0.0740354
1	71250001	71400000	2008	0.123617	0.0940822
1	71325001	71475000	2031	0.120651	0.0978781
1	71400001	71550000	1810	0.168216	0.114909
1	71475001	71625000	1577	0.242173	0.166468
1	71550001	71700000	1180	0.21891	0.157884
1	71625001	71775000	935	0.160696	0.119017
1	71700001	71850000	1454	0.191305	0.137724
1	71775001	71925000	2065	0.212221	0.146622
1	71850001	72000000	1741	0.272524	0.17931
1	71925001	72075000	1377	0.311561	0.197721
1	72000001	72150000	1342	0.182385	0.116031
1	72075001	72225000	1005	0.119914	0.0986868
1	72150001	72300000	943	0.207807	0.148591
1	72225001	72375000	1382	0.197651	0.131852
1	72300001	72450000	1405	0.198228	0.137414
1	72375001	72525000	876	0.194591	0.140929
1	72450001	72600000	968	0.12474	0.0961434
1	72525001	72675000	729	0.135239	0.0992487
1	72600001	72750000	182	0.332425	0.216581
1	72675001	72825000	838	0.231492	0.170564
1	72750001	72900000	1462	0.224165	0.162268
1	72825001	72975000	1495	0.203113	0.143365
1	72900001	73050000	1354	0.148721	0.114504
1	72975001	73125000	1221	0.192573	0.139116
1	73050001	73200000	977	0.208128	0.145124
1	73125001	73275000	479	0.131473	0.101547
1	73200001	73350000	527	0.189451	0.135366
1	73275001	73425000	1039	0.152592	0.110743
1	73350001	73500000	986	0.113012	0.081556
1	73425001	73575000	1058	0.123882	0.0954358
1	73500001	73650000	1458	0.244933	0.16789
1	73575001	73725000	1355	0.296115	0.202135
1	73650001	73800000	1304	0.20193	0.14978
1	73725001	73875000	1287	0.15041	0.112478
1	73800001	73950000	1162	0.282227	0.175962
1	73875001	74025000	1149	0.354085	0.227275
1	73950001	74100000	1505	0.290925	0.172066
1	74025001	74175000	1803	0.25206	0.151762
1	74100001	74250000	1596	0.183556	0.118832
1	74175001	74325000	1304	0.175308	0.118267
1	74250001	74400000	1335	0.183339	0.134897
1	74325001	74475000	1037	0.202208	0.145629
1	74400001	74550000	792	0.184491	0.134379
1	74475001	74625000	777	0.135047	0.106394
1	74550001	74700000	855	0.200564	0.150764
1	74625001	74775000	1003	0.247655	0.179168
1	74700001	74850000	741	0.317923	0.220892
1	74775001	74925000	1049	0.273839	0.190066
1	74850001	75000000	1622	0.219513	0.162142
1	74925001	75075000	1733	0.216143	0.167448
1	75000001	75150000	1892	0.184658	0.136234
1	75075001	75225000	1857	0.14806	0.107893
1	75150001	75300000	1633	0.1357	0.100711
1	75225001	75375000	1520	0.145657	0.1071
1	75300001	75450000	1325	0.2215	0.147971
1	75375001	75525000	1233	0.219311	0.134587
1	75450001	75600000	947	0.258021	0.155574
1	75525001	75675000	540	0.30328	0.189715
1	75600001	75750000	1154	0.170645	0.116117
1	75675001	75825000	1748	0.220998	0.150146
1	75750001	75900000	1885	0.238019	0.177523
1	75825001	75975000	2294	0.185866	0.145848
1	75900001	76050000	2312	0.162108	0.122994
1	75975001	76125000	2154	0.182838	0.138721
1	76050001	76200000	1929	0.233708	0.169059
1	76125001	76275000	1952	0.235456	0.168658
1	76200001	76350000	1870	0.184933	0.14319
1	76275001	76425000	1754	0.185268	0.135328
1	76350001	76500000	1545	0.169218	0.128779
1	76425001	76575000	1371	0.122083	0.104291
1	76500001	76650000	1339	0.130556	0.104872
1	76575001	76725000	1450	0.17774	0.126807
1	76650001	76800000	2057	0.194474	0.144922
1	76725001	76875000	2079	0.231303	0.172383
1	76800001	76950000	2061	0.183485	0.142272
1	76875001	77025000	2255	0.116097	0.100308
1	76950001	77100000	2089	0.178608	0.13678
1	77025001	77175000	2523	0.227725	0.172378
1	77100001	77250000	2932	0.186138	0.141907
1	77175001	77325000	2297	0.139375	0.109588
1	77250001	77400000	2112	0.160822	0.12523
1	77325001	77475000	2080	0.191804	0.146129
1	77400001	77550000	1945	0.166122	0.126512
1	77475001	77625000	2260	0.124733	0.102152
1	77550001	77700000	2146	0.126379	0.105155
1	77625001	77775000	1911	0.13027	0.111443
1	77700001	77850000	1756	0.178654	0.137802
1	77775001	77925000	1470	0.170888	0.130412
1	77850001	78000000	1325	0.143105	0.11408
1	77925001	78075000	1205	0.159005	0.124177
1	78000001	78150000	1099	0.200625	0.165614
1	78075001	78225000	1503	0.184197	0.161962
1	78150001	78300000	2179	0.195516	0.148409
1	78225001	78375000	2239	0.1871	0.133812
1	78300001	78450000	2033	0.102863	0.084046
1	78375001	78525000	2251	0.113932	0.093419
1	78450001	78600000	1796	0.135111	0.109063
1	78525001	78675000	1534	0.17791	0.129074
1	78600001	78750000	1991	0.254944	0.164635
1	78675001	78825000	2048	0.253113	0.161306
1	78750001	78900000	2019	0.189495	0.131874
1	78825001	78975000	1935	0.164094	0.119081
1	78900001	79050000	966	0.151504	0.112645
1	78975001	79125000	57	0.25813	0.168964
1	79050001	79200000	778	0.157468	0.111335
1	79125001	79275000	1612	0.128393	0.0968703
1	79200001	79350000	1771	0.12366	0.0989665
1	79275001	79425000	1974	0.178709	0.126915
1	79350001	79500000	2116	0.178341	0.12474
1	79425001	79575000	2149	0.125901	0.0999661
1	79500001	79650000	1890	0.121126	0.0982045
1	79575001	79725000	1478	0.199417	0.140578
1	79650001	79800000	1528	0.29025	0.188296
1	79725001	79875000	1601	0.292506	0.196354
1	79800001	79950000	886	0.271469	0.187481
1	79875001	80025000	1047	0.184982	0.152394
1	79950001	80100000	1899	0.178274	0.146028
1	80025001	80175000	2043	0.181862	0.133343
1	80100001	80250000	1671	0.172181	0.124616
1	80175001	80325000	1934	0.240688	0.179602
1	80250001	80400000	2365	0.229536	0.168484
1	80325001	80475000	2122	0.132503	0.107417
1	80400001	80550000	2270	0.154163	0.109187
1	80475001	80625000	2159	0.208121	0.140803
1	80550001	80700000	1606	0.226721	0.155292
1	80625001	80775000	877	0.208728	0.131916
1	80700001	80850000	1497	0.234123	0.158973
1	80775001	80925000	2309	0.185175	0.129717
1	80850001	81000000	2445	0.144779	0.111457
1	80925001	81075000	2544	0.19257	0.145896
1	81000001	81150000	2445	0.240105	0.170701
1	81075001	81225000	2014	0.244967	0.172171
1	81150001	81300000	1534	0.197293	0.138348
1	81225001	81375000	2120	0.172988	0.118009
1	81300001	81450000	2607	0.220904	0.15329
1	81375001	81525000	2213	0.264048	0.179786
1	81450001	81600000	2049	0.242841	0.154909
1	81525001	81675000	2319	0.229917	0.160549
1	81600001	81750000	2292	0.199822	0.149715
1	81675001	81825000	2155	0.180366	0.13733
1	81750001	81900000	1765	0.181192	0.147138
1	81825001	81975000	1214	0.148603	0.125745
1	81900001	82050000	1384	0.156897	0.116495
1	81975001	82125000	1771	0.135687	0.105351
1	82050001	82200000	1769	0.100494	0.0851185
1	82125001	82275000	1719	0.115997	0.0886802
1	82200001	82350000	1657	0.155022	0.109876
1	82275001	82425000	1823	0.199198	0.146934
1	82350001	82500000	2115	0.264884	0.192583
1	82425001	82575000	2235	0.223081	0.160591
1	82500001	82650000	2262	0.15533	0.125377
1	82575001	82725000	1552	0.162861	0.130517
1	82650001	82800000	1002	0.16525	0.116299
1	82725001	82875000	1370	0.184941	0.130214
1	82800001	82950000	1658	0.195239	0.14135
1	82875001	83025000	2016	0.222495	0.157827
1	82950001	83100000	2219	0.203284	0.14254
1	83025001	83175000	2118	0.229557	0.155404
1	83100001	83250000	2012	0.271041	0.18348
1	83175001	83325000	2256	0.207622	0.14887
1	83250001	83400000	2407	0.168467	0.126994
1	83325001	83475000	2267	0.15214	0.117004
1	83400001	83550000	2084	0.164837	0.124467
1	83475001	83625000	1732	0.182577	0.130639
1	83550001	83700000	1685	0.147662	0.117558
1	83625001	83775000	2172	0.129566	0.111161
1	83700001	83850000	2531	0.165191	0.12872
1	83775001	83925000	2487	0.201421	0.144836
1	83850001	84000000	2380	0.204041	0.148685
1	83925001	84075000	2508	0.182816	0.138305
1	84000001	84150000	2729	0.133027	0.108253
1	84075001	84225000	2602	0.112256	0.100173
1	84150001	84300000	2541	0.118339	0.100857
1	84225001	84375000	2798	0.128012	0.0974514
1	84300001	84450000	2617	0.137765	0.106527
1	84375001	84525000	2447	0.144076	0.119195
1	84450001	84600000	2409	0.150508	0.118134
1	84525001	84675000	1713	0.243776	0.161888
1	84600001	84750000	1676	0.21642	0.152896
1	84675001	84825000	2221	0.14308	0.117703
1	84750001	84900000	2034	0.129499	0.109192
1	84825001	84975000	2075	0.157888	0.120618
1	84900001	85050000	2354	0.184373	0.138441
1	84975001	85125000	2145	0.14127	0.113854
1	85050001	85200000	1884	0.199853	0.138712
1	85125001	85275000	2076	0.230087	0.130965
1	85200001	85350000	1976	0.191578	0.115591
1	85275001	85425000	1597	0.214001	0.156644
1	85350001	85500000	2203	0.174658	0.146582
1	85425001	85575000	2370	0.151846	0.127939
1	85500001	85650000	1901	0.13892	0.109999
1	85575001	85725000	2199	0.108674	0.0910497
1	85650001	85800000	2263	0.0767595	0.0747345
1	85725001	85875000	1937	0.0857159	0.0805735
1	85800001	85950000	2031	0.136346	0.111494
1	85875001	86025000	2462	0.168202	0.130802
1	85950001	86100000	2592	0.191537	0.138199
1	86025001	86175000	2488	0.15127	0.111989
1	86100001	86250000	2324	0.134398	0.110237
1	86175001	86325000	2105	0.176338	0.139968
1	86250001	86400000	2273	0.185501	0.139785
1	86325001	86475000	2307	0.18347	0.133015
1	86400001	86550000	1843	0.159587	0.124478
1	86475001	86625000	2083	0.145419	0.120784
1	86550001	86700000	3017	0.156577	0.12151
1	86625001	86775000	3028	0.153371	0.117917
1	86700001	86850000	2588	0.14652	0.113329
1	86775001	86925000	3269	0.106062	0.0900656
1	86850001	87000000	3693	0.0962002	0.0868731
1	86925001	87075000	3060	0.177862	0.131494
1	87000001	87150000	2468	0.245895	0.174563
1	87075001	87225000	2566	0.203112	0.131322
1	87150001	87300000	2834	0.322693	0.177536
1	87225001	87375000	2591	0.371493	0.226524
1	87300001	87450000	2490	0.259724	0.166699
1	87375001	87525000	2673	0.256085	0.164056
1	87450001	87600000	2602	0.220582	0.142998
1	87525001	87675000	2345	0.153087	0.112092
1	87600001	87750000	2499	0.165496	0.122718
1	87675001	87825000	2474	0.197514	0.145244
1	87750001	87900000	2406	0.215624	0.161472
1	87825001	87975000	2418	0.196121	0.13985
1	87900001	88050000	2626	0.168355	0.121661
1	87975001	88125000	2831	0.151893	0.116928
1	88050001	88200000	2625	0.202128	0.141856
1	88125001	88275000	2420	0.191728	0.13454
1	88200001	88350000	2521	0.162816	0.124081
1	88275001	88425000	2499	0.22177	0.163723
1	88350001	88500000	2141	0.238916	0.170575
1	88425001	88575000	2110	0.259795	0.177981
1	88500001	88650000	2178	0.24396	0.172249
1	88575001	88725000	2299	0.187898	0.139289
1	88650001	88800000	2355	0.222973	0.160703
1	88725001	88875000	2267	0.225852	0.164996
1	88800001	88950000	2323	0.147694	0.116074
1	88875001	89025000	1944	0.1362	0.107116
1	88950001	89100000	1732	0.15727	0.122022
1	89025001	89175000	1938	0.19034	0.138049
1	89100001	89250000	1906	0.219904	0.147465
1	89175001	89325000	1967	0.197303	0.134755
1	89250001	89400000	1993	0.176716	0.130922
1	89325001	89475000	2061	0.163466	0.126168
1	89400001	89550000	2156	0.196067	0.139955
1	89475001	89625000	2140	0.183417	0.13704
1	89550001	89700000	1989	0.138085	0.115498
1	89625001	89775000	1746	0.161386	0.12335
1	89700001	89850000	1897	0.135751	0.102267
1	89775001	89925000	2238	0.104556	0.0847852
1	89850001	90000000	2227	0.156749	0.120817
1	89925001	90075000	2135	0.19881	0.154428
1	90000001	90150000	2120	0.180582	0.137044
1	90075001	90225000	1561	0.199716	0.136896
1	90150001	90300000	1200	0.236946	0.161564
1	90225001	90375000	1786	0.294918	0.201332
1	90300001	90450000	2140	0.241782	0.158236
1	90375001	90525000	1952	0.196425	0.125759
1	90450001	90600000	1744	0.261391	0.168704
1	90525001	90675000	1547	0.228426	0.157258
1	90600001	90750000	1535	0.18908	0.132565
1	90675001	90825000	1923	0.15671	0.122962
1	90750001	90900000	1906	0.135707	0.110579
1	90825001	90975000	1392	0.131625	0.107367
1	90900001	91050000	1475	0.145395	0.121714
1	90975001	91125000	1522	0.158478	0.120162
1	91050001	91200000	1050	0.208588	0.136071
1	91125001	91275000	1028	0.183385	0.126793
1	91200001	91350000	1086	0.225521	0.153843
1	91275001	91425000	954	0.251452	0.173703
1	91350001	91500000	1198	0.208138	0.145838
1	91425001	91575000	2282	0.166381	0.125652
1	91500001	91650000	2979	0.132611	0.107279
1	91575001	91725000	2121	0.111109	0.0957757
1	91650001	91800000	1562	0.158611	0.133035
1	91725001	91875000	1446	0.193736	0.158807
1	91800001	91950000	1116	0.21304	0.166865
1	91875001	92025000	1284	0.185535	0.142548
1	91950001	92100000	1453	0.122993	0.102111
1	92025001	92175000	1215	0.138059	0.108713
1	92100001	92250000	1006	0.153515	0.123829
1	92175001	92325000	1447	0.145619	0.122234
1	92250001	92400000	1852	0.178043	0.139029
1	92325001	92475000	1895	0.192527	0.143817
1	92400001	92550000	1674	0.158569	0.119654
1	92475001	92625000	1481	0.157699	0.119351
1	92550001	92700000	1857	0.190758	0.140814
1	92625001	92775000	2059	0.176938	0.136122
1	92700001	92850000	1760	0.172962	0.139101
1	92775001	92925000	1490	0.180239	0.14386
1	92850001	93000000	1121	0.162224	0.134064
1	92925001	93075000	760	0.220052	0.172942
1	93000001	93150000	1057	0.226552	0.169349
1	93075001	93225000	1585	0.151924	0.118398
1	93150001	93300000	2134	0.0898757	0.076904
1	93225001	93375000	2412	0.0949143	0.0828783
1	93300001	93450000	2148	0.112973	0.0928127
1	93375001	93525000	1140	0.119186	0.0859732
1	93450001	93600000	699	0.195042	0.140604
1	93525001	93675000	1478	0.149713	0.119218
1	93600001	93750000	2205	0.142253	0.112712
1	93675001	93825000	2101	0.174246	0.128669
1	93750001	93900000	1303	0.194554	0.140166
1	93825001	93975000	1167	0.163896	0.132578
1	93900001	94050000	1569	0.140024	0.12212
1	93975001	94125000	1682	0.158196	0.126063
1	94050001	94200000	1530	0.213916	0.142747
1	94125001	94275000	1555	0.27377	0.178803
1	94200001	94350000	1524	0.254276	0.177678
1	94275001	94425000	1876	0.258787	0.173064
1	94350001	94500000	2530	0.278281	0.183808
1	94425001	94575000	2143	0.267485	0.183236
1	94500001	94650000	1314	0.25813	0.175082
1	94575001	94725000	790	0.247589	0.154254
1	94650001	94800000	739	0.273737	0.159122
1	94725001	94875000	847	0.308353	0.183264
1	94800001	94950000	1502	0.28738	0.182207
1	94875001	95025000	1631	0.262949	0.16698
1	94950001	95100000	1263	0.234274	0.150981
1	95025001	95175000	1343	0.30266	0.190322
1	95100001	95250000	1425	0.316617	0.210257
1	95175001	95325000	946	0.265747	0.185669
1	95250001	95400000	985	0.321216	0.20754
1	95325001	95475000	1910	0.290761	0.184213
1	95400001	95550000	2028	0.246918	0.155766
1	95475001	95625000	1628	0.232979	0.141535
1	95550001	95700000	1878	0.20331	0.133004
1	95625001	95775000	2033	0.213893	0.146175
1	95700001	95850000	1620	0.221964	0.148614
1	95775001	95925000	1327	0.228733	0.152247
1	95850001	96000000	1162	0.319177	0.217408
1	95925001	96075000	1342	0.271356	0.18421
1	96000001	96150000	1361	0.209155	0.141599
1	96075001	96225000	1629	0.264128	0.176657
1	96150001	96300000	1859	0.278412	0.186863
1	96225001	96375000	1983	0.278859	0.188494
1	96300001	96450000	2393	0.225596	0.151901
1	96375001	96525000	2135	0.226549	0.150507
1	96450001	96600000	1214	0.304076	0.196044
1	96525001	96675000	871	0.260151	0.153375
1	96600001	96750000	1181	0.209243	0.129498
1	96675001	96825000	1214	0.256765	0.159117
1	96750001	96900000	1353	0.332304	0.194435
1	96825001	96975000	1365	0.310499	0.192565
1	96900001	97050000	1089	0.278366	0.185206
1	96975001	97125000	785	0.3136	0.201993
1	97050001	97200000	531	0.351993	0.215128
1	97125001	97275000	875	0.262151	0.163824
1	97200001	97350000	1400	0.218115	0.143322
1	97275001	97425000	1639	0.200882	0.141086
1	97350001	97500000	1670	0.21725	0.156585
1	97425001	97575000	1609	0.247941	0.175895
1	97500001	97650000	1655	0.265263	0.186815
1	97575001	97725000	2056	0.241171	0.163068
1	97650001	97800000	2223	0.20755	0.13487
1	97725001	97875000	2032	0.223669	0.146747
1	97800001	97950000	1912	0.262238	0.174033
1	97875001	98025000	1791	0.247955	0.162086
1	97950001	98100000	1872	0.267483	0.172945
1	98025001	98175000	1960	0.249067	0.158801
1	98100001	98250000	1949	0.199493	0.131325
1	98175001	98325000	2018	0.18108	0.125312
1	98250001	98400000	1922	0.166735	0.126529
1	98325001	98475000	1823	0.194247	0.14852
1	98400001	98550000	1973	0.192685	0.146603
1	98475001	98625000	2022	0.1999	0.146717
1	98550001	98700000	1841	0.193499	0.139038
1	98625001	98775000	1686	0.174431	0.128221
1	98700001	98850000	1479	0.226683	0.153648
1	98775001	98925000	1462	0.25031	0.170915
1	98850001	99000000	1725	0.241179	0.176454
1	98925001	99075000	1666	0.257926	0.185756
1	99000001	99150000	1918	0.185708	0.133243
1	99075001	99225000	2154	0.153983	0.117829
1	99150001	99300000	1895	0.22123	0.166103
1	99225001	99375000	1779	0.215826	0.168777
1	99300001	99450000	1979	0.147572	0.116637
1	99375001	99525000	2197	0.161942	0.121824
1	99450001	99600000	2069	0.200062	0.146198
1	99525001	99675000	1889	0.208943	0.144522
1	99600001	99750000	1455	0.215874	0.145016
1	99675001	99825000	1439	0.268304	0.177083
1	99750001	99900000	1777	0.336417	0.205106
1	99825001	99975000	1965	0.337996	0.210302
1	99900001	100050000	2189	0.265697	0.184438
1	99975001	100125000	2133	0.27514	0.190883
1	100050001	100200000	1981	0.259029	0.178287
1	100125001	100275000	1910	0.198912	0.144318
1	100200001	100350000	1980	0.207131	0.143933
1	100275001	100425000	1800	0.170813	0.122103
1	100350001	100500000	1153	0.141493	0.108979
1	100425001	100575000	1499	0.213003	0.161477
1	100500001	100650000	2000	0.284335	0.196935
1	100575001	100725000	1082	0.324164	0.208178
1	100650001	100800000	847	0.167268	0.114743
1	100725001	100875000	1685	0.152063	0.113711
1	100800001	100950000	1830	0.1845	0.135148
1	100875001	101025000	1831	0.172228	0.129931
1	100950001	101100000	1859	0.140296	0.113891
1	101025001	101175000	1788	0.135358	0.117911
1	101100001	101250000	1963	0.180845	0.139097
1	101175001	101325000	1863	0.217347	0.152872
1	101250001	101400000	1843	0.218864	0.156795
1	101325001	101475000	1861	0.266125	0.184127
1	101400001	101550000	1665	0.249374	0.166103
1	101475001	101625000	1844	0.24029	0.158948
1	101550001	101700000	1906	0.230429	0.154223
1	101625001	101775000	1897	0.172165	0.133652
1	101700001	101850000	1570	0.205085	0.158997
1	101775001	101925000	1444	0.331683	0.220841
1	101850001	102000000	1610	0.358923	0.232707
1	101925001	102075000	1808	0.240856	0.166573
1	102000001	102150000	2101	0.15793	0.121418
1	102075001	102225000	1886	0.125546	0.104058
1	102150001	102300000	1525	0.19735	0.140345
1	102225001	102375000	1294	0.305187	0.200935
1	102300001	102450000	1225	0.258848	0.177464
1	102375001	102525000	1249	0.22191	0.164553
1	102450001	102600000	1473	0.213491	0.157367
1	102525001	102675000	1974	0.215333	0.153845
1	102600001	102750000	2337	0.170764	0.130164
1	102675001	102825000	1982	0.0978434	0.088261
1	102750001	102900000	2122	0.160913	0.112992
1	102825001	102975000	2436	0.26326	0.160452
1	102900001	103050000	1754	0.272432	0.170836
1	102975001	103125000	1274	0.182553	0.130072
1	103050001	103200000	1771	0.176324	0.124825
1	103125001	103275000	2253	0.181702	0.125828
1	103200001	103350000	1820	0.191801	0.128485
1	103275001	103425000	1115	0.217118	0.139413
1	103350001	103500000	1066	0.19487	0.129405
1	103425001	103575000	1297	0.196913	0.138369
1	103500001	103650000	1299	0.213885	0.143165
1	103575001	103725000	1312	0.19573	0.133361
1	103650001	103800000	1477	0.226173	0.155221
1	103725001	103875000	1498	0.212341	0.146629
1	103800001	103950000	1530	0.138274	0.108205
1	103875001	104025000	1938	0.104565	0.087818
1	103950001	104100000	2043	0.106688	0.0852553
1	104025001	104175000	1166	0.148088	0.105882
1	104100001	104250000	1070	0.160104	0.118944
1	104175001	104325000	1701	0.123824	0.0999499
1	104250001	104400000	1527	0.134976	0.103399
1	104325001	104475000	1324	0.195937	0.132438
1	104400001	104550000	1224	0.18761	0.12385
1	104475001	104625000	1075	0.129539	0.0980308
1	104550001	104700000	1301	0.193617	0.148491
1	104625001	104775000	1689	0.18647	0.140681
1	104700001	104850000	1436	0.119146	0.100142
1	104775001	104925000	1022	0.12244	0.100611
1	104850001	105000000	865	0.224912	0.158615
1	104925001	105075000	721	0.275544	0.19229
1	105000001	105150000	410	0.251901	0.176179
1	105075001	105225000	558	0.20261	0.148369
1	105150001	105300000	1126	0.162779	0.127563
1	105225001	105375000	1504	0.192279	0.144212
1	105300001	105450000	1672	0.198002	0.133394
1	105375001	105525000	1619	0.146724	0.103834
1	105450001	105600000	1652	0.137966	0.107407
1	105525001	105675000	1919	0.208051	0.15233
1	105600001	105750000	1620	0.244825	0.178423
1	105675001	105825000	1004	0.280257	0.18885
1	105750001	105900000	849	0.284272	0.18806
1	105825001	105975000	1373	0.139968	0.107017
1	105900001	106050000	1861	0.144013	0.114956
1	105975001	106125000	1494	0.213685	0.164343
1	106050001	106200000	1195	0.240985	0.170792
1	106125001	106275000	1102	0.179772	0.127062
1	106200001	106350000	1145	0.169025	0.124518
1	106275001	106425000	1138	0.16123	0.123186
1	106350001	106500000	1241	0.189259	0.134303
1	106425001	106575000	1354	0.472592	0.307825
1	106500001	106650000	1380	0.509767	0.346828
1	106575001	106725000	1288	0.337089	0.223773
1	106650001	106800000	1076	0.282001	0.189237
1	106725001	106875000	918	0.198573	0.141563
1	106800001	106950000	1087	0.147707	0.119516
1	106875001	107025000	1209	0.203131	0.157251
1	106950001	107100000	1427	0.20138	0.145346
1	107025001	107175000	1608	0.178259	0.131911
1	107100001	107250000	1494	0.162849	0.131774
1	107175001	107325000	1531	0.136512	0.114503
1	107250001	107400000	1456	0.192222	0.140484
1	107325001	107475000	1175	0.217827	0.146233
1	107400001	107550000	1072	0.288577	0.17531
1	107475001	107625000	1247	0.323552	0.20745
1	107550001	107700000	1197	0.278332	0.176654
1	107625001	107775000	620	0.250444	0.158308
1	107700001	107850000	652	0.315876	0.218841
1	107775001	107925000	1335	0.290082	0.208094
1	107850001	108000000	1734	0.261757	0.180811
1	107925001	108075000	1890	0.221236	0.147469
1	108000001	108150000	1762	0.188315	0.131161
1	108075001	108225000	1370	0.258273	0.161979
1	108150001	108300000	1451	0.288081	0.185039
1	108225001	108375000	2622	0.27438	0.184188
1	108300001	108450000	2216	0.271402	0.181337
1	108375001	108525000	992	0.254357	0.169266
1	108450001	108600000	1376	0.229542	0.166513
1	108525001	108675000	2178	0.279439	0.178268
1	108600001	108750000	1926	0.287062	0.168769
1	108675001	108825000	1740	0.164229	0.117819
1	108750001	108900000	2254	0.171065	0.121728
1	108825001	108975000	2187	0.208381	0.146642
1	108900001	109050000	1092	0.259483	0.174925
1	108975001	109125000	796	0.206318	0.147735
1	109050001	109200000	1559	0.192618	0.147367
1	109125001	109275000	1647	0.258289	0.18205
1	109200001	109350000	1613	0.26366	0.177894
1	109275001	109425000	1519	0.199384	0.140587
1	109350001	109500000	786	0.185344	0.129433
1	109425001	109575000	801	0.203265	0.139574
1	109500001	109650000	2006	0.195913	0.148229
1	109575001	109725000	2515	0.155598	0.132576
1	109650001	109800000	2284	0.156523	0.128438
1	109725001	109875000	2105	0.236463	0.1623
1	109800001	109950000	2572	0.253441	0.171328
1	109875001	110025000	2523	0.241257	0.17872
1	109950001	110100000	1081	0.265864	0.20429
1	110025001	110175000	1122	0.3971	0.262011
1	110100001	110250000	1805	0.325409	0.216898
1	110175001	110325000	1401	0.184295	0.137369
1	110250001	110400000	1071	0.147105	0.116719
1	110325001	110475000	620	0.21192	0.149034
1	110400001	110550000	543	0.258276	0.148638
1	110475001	110625000	1142	0.282051	0.168878
1	110550001	110700000	1089	0.268839	0.172124
1	110625001	110775000	780	0.198119	0.150042
1	110700001	110850000	1484	0.239214	0.16546
1	110775001	110925000	1901	0.201868	0.148171
1	110850001	111000000	1636	0.228133	0.160138
1	110925001	111075000	1591	0.394659	0.231442
1	111000001	111150000	1631	0.402502	0.242564
1	111075001	111225000	1498	0.32659	0.212697
1	111150001	111300000	1552	0.229638	0.156253
1	111225001	111375000	1477	0.186698	0.130427
1	111300001	111450000	892	0.23755	0.156726
1	111375001	111525000	635	0.252135	0.161649
1	111450001	111600000	723	0.235702	0.1584
1	111525001	111675000	902	0.237656	0.1641
1	111600001	111750000	871	0.18527	0.131023
1	111675001	111825000	555	0.150104	0.10846
1	111750001	111900000	598	0.217671	0.123709
1	111825001	111975000	1138	0.335901	0.188614
1	111900001	112050000	1706	0.288738	0.189107
1	111975001	112125000	1528	0.176814	0.136585
1	112050001	112200000	1269	0.147835	0.118586
1	112125001	112275000	1354	0.160978	0.127586
1	112200001	112350000	1259	0.149787	0.123071
1	112275001	112425000	1281	0.142331	0.119298
1	112350001	112500000	1353	0.124866	0.104427
1	112425001	112575000	1253	0.126838	0.101343
1	112500001	112650000	1141	0.168924	0.12375
1	112575001	112725000	1285	0.309874	0.191217
1	112650001	112800000	1485	0.283877	0.178434
1	112725001	112875000	1420	0.169138	0.120166
1	112800001	112950000	1343	0.161645	0.118799
1	112875001	113025000	1243	0.163471	0.121275
1	112950001	113100000	1241	0.220282	0.149938
1	113025001	113175000	1421	0.304966	0.205806
1	113100001	113250000	1455	0.356739	0.240417
1	113175001	113325000	2215	0.381124	0.252367
1	113250001	113400000	2444	0.339458	0.221143
1	113325001	113475000	1138	0.276886	0.184011
1	113400001	113550000	446	0.2674	0.174252
1	113475001	113625000	535	0.233221	0.149317
1	113550001	113700000	1103	0.261019	0.172714
1	113625001	113775000	2144	0.240693	0.165682
1	113700001	113850000	2450	0.191247	0.138338
1	113775001	113925000	2563	0.171041	0.121913
1	113850001	114000000	2062	0.217741	0.143171
1	113925001	114075000	1268	0.22944	0.165609
1	114000001	114150000	1771	0.212494	0.164195
1	114075001	114225000	1980	0.202855	0.157636
1	114150001	114300000	1947	0.16801	0.130335
1	114225001	114375000	2100	0.134837	0.105465
1	114300001	114450000	2406	0.169061	0.127908
1	114375001	114525000	2434	0.274168	0.187846
1	114450001	114600000	2449	0.256569	0.179859
1	114525001	114675000	2081	0.194326	0.151834
1	114600001	114750000	1501	0.188589	0.147067
1	114675001	114825000	1486	0.170209	0.128933
1	114750001	114900000	1463	0.208486	0.15664
1	114825001	114975000	1825	0.164028	0.13201
1	114900001	115050000	2314	0.235146	0.164629
1	114975001	115125000	2223	0.293259	0.209985
1	115050001	115200000	1905	0.258142	0.16961
1	115125001	115275000	1945	0.315806	0.192098
1	115200001	115350000	1736	0.28282	0.188623
1	115275001	115425000	1869	0.126916	0.104779
1	115350001	115500000	1238	0.119443	0.10233
1	115425001	115575000	564	0.275528	0.19845
1	115500001	115650000	468	0.281001	0.208003
1	115575001	115725000	57	0.316189	0.203692
1	115650001	115800000	289	0.334388	0.194126
1	115725001	115875000	1759	0.223907	0.14722
1	115800001	115950000	2057	0.193712	0.132668
1	115875001	116025000	1770	0.222406	0.165118
1	115950001	116100000	2352	0.230332	0.178124
1	116025001	116175000	2193	0.221772	0.170954
1	116100001	116250000	1817	0.351666	0.242465
1	116175001	116325000	825	0.482893	0.344483
1	116250001	116400000	1315	0.279381	0.19359
1	116325001	116475000	2481	0.255075	0.177108
1	116400001	116550000	2545	0.295348	0.202174
1	116475001	116625000	2476	0.275342	0.193808
1	116550001	116700000	2042	0.211388	0.149706
1	116625001	116775000	1821	0.206202	0.142314
1	116700001	116850000	1645	0.25384	0.166951
1	116775001	116925000	1686	0.252343	0.168906
1	116850001	117000000	1987	0.127367	0.0996951
1	116925001	117075000	2209	0.105871	0.0854498
1	117000001	117150000	2058	0.226684	0.161352
1	117075001	117225000	1547	0.223968	0.164798
1	117150001	117300000	858	0.0933051	0.0847676
1	117225001	117375000	265	0.136013	0.100409
1	117300001	117450000	117	0.15983	0.110729
1	117375001	117525000	419	0.1508	0.108839
1	117450001	117600000	1224	0.186445	0.142355
1	117525001	117675000	1607	0.184873	0.144227
1	117600001	117750000	1741	0.138296	0.111831
1	117675001	117825000	1567	0.1213	0.105689
1	117750001	117900000	1654	0.191331	0.146695
1	117825001	117975000	1755	0.239891	0.174649
1	117900001	118050000	1482	0.267374	0.197784
1	117975001	118125000	1135	0.240049	0.180384
1	118050001	118200000	704	0.177488	0.139999
1	118125001	118275000	1065	0.201267	0.155585
1	118200001	118350000	1273	0.229283	0.165914
1	118275001	118425000	1351	0.243879	0.166466
1	118350001	118500000	1469	0.25467	0.174599
1	118425001	118575000	1474	0.35153	0.221615
1	118500001	118650000	1595	0.346492	0.220053
1	118575001	118725000	2490	0.271299	0.178098
1	118650001	118800000	3016	0.233184	0.15328
1	118725001	118875000	1670	0.212517	0.138087
1	118800001	118950000	1165	0.343996	0.200696
1	118875001	119025000	902	0.343955	0.202449
1	118950001	119100000	181	0.128776	0.078546
1	119025001	119175000	650	0.104095	0.0739396
1	119100001	119250000	1406	0.254684	0.189291
1	119175001	119325000	854	0.33549	0.262089
1	119250001	119400000	41	0.0211033	0.00917232
1	119325001	119475000	410	0.233396	0.184453
1	119400001	119550000	1444	0.256439	0.183707
1	119475001	119625000	1661	0.25685	0.167875
1	119550001	119700000	992	0.284775	0.168195
1	119625001	119775000	1067	0.377114	0.231796
1	119700001	119850000	1452	0.282644	0.2019
1	119775001	119925000	1482	0.245479	0.186701
1	119850001	120000000	708	0.311446	0.217482
1	119925001	120075000	383	0.156351	0.124372
1	120000001	120150000	1221	0.201034	0.150248
1	120075001	120225000	1690	0.215996	0.156544
1	120150001	120300000	1619	0.238935	0.167997
1	120225001	120375000	1260	0.31321	0.196045
1	120300001	120450000	863	0.378372	0.194785
1	120375001	120525000	900	0.31544	0.136292
1	120450001	120600000	1157	0.339299	0.178451
1	120525001	120675000	1465	0.34172	0.211316
1	120600001	120750000	1714	0.391557	0.222572
1	120675001	120825000	1890	0.422537	0.248036
1	120750001	120900000	2086	0.359765	0.22895
1	120825001	120975000	2096	0.364303	0.239622
1	120900001	121050000	1798	0.393418	0.257091
1	120975001	121125000	1459	0.362772	0.226716
1	121050001	121200000	1630	0.263775	0.173865
1	121125001	121275000	1073	0.218591	0.149975
1	121200001	121350000	329	0.215695	0.123896
1	121275001	121425000	926	0.201735	0.12512
1	121350001	121500000	1625	0.225174	0.155328
1	121425001	121575000	1601	0.221745	0.152172
1	121500001	121650000	1158	0.164659	0.112667
1	121575001	121725000	1574	0.168564	0.122006
1	121650001	121800000	2311	0.214273	0.155392
1	121725001	121875000	2253	0.242861	0.18679
1	121800001	121950000	2245	0.224199	0.165398
1	121875001	122025000	2206	0.233392	0.17039
1	121950001	122100000	2190	0.194755	0.15421
1	122025001	122175000	1803	0.131931	0.111216
1	122100001	122250000	836	0.176644	0.123321
1	122175001	122325000	1019	0.36757	0.213572
1	122250001	122400000	1478	0.294264	0.176193
1	122325001	122475000	1508	0.126177	0.106874
1	122400001	122550000	1863	0.156409	0.122099
1	122475001	122625000	1495	0.162478	0.116535
1	122550001	122700000	1220	0.162588	0.106714
1	122625001	122775000	1564	0.231567	0.125197
1	122700001	122850000	1791	0.392611	0.216763
1	122775001	122925000	1391	0.405476	0.243501
1	122850001	123000000	1370	0.227506	0.146795
1	122925001	123075000	1677	0.226321	0.142021
1	123000001	123150000	1703	0.286976	0.172102
1	123075001	123225000	1355	0.332346	0.199557
1	123150001	123300000	1144	0.204927	0.125477
1	123225001	123375000	1515	0.194732	0.138443
1	123300001	123450000	864	0.24883	0.180866
1	123375001	123525000	754	0.215126	0.138405
1	123450001	123600000	1228	0.190593	0.134907
1	123525001	123675000	1370	0.167834	0.109345
1	123600001	123750000	1884	0.180508	0.112102
1	123675001	123825000	2026	0.192874	0.133938
1	123750001	123900000	1905	0.39679	0.251055
1	123825001	123975000	1362	0.481776	0.31451
1	123900001	124050000	1094	0.2501	0.166054
1	123975001	124125000	1419	0.238751	0.148486
1	124050001	124200000	1337	0.241124	0.149228
1	124125001	124275000	1577	0.263247	0.169341
1	124200001	124350000	1455	0.290398	0.181854
1	124275001	124425000	751	0.333405	0.196678
1	124350001	124500000	1016	0.330632	0.229141
1	124425001	124575000	1728	0.374827	0.248447
1	124500001	124650000	1843	0.407453	0.262157
1	124575001	124725000	1656	0.37306	0.237562
1	124650001	124800000	1532	0.315982	0.201861
1	124725001	124875000	1551	0.289265	0.184184
1	124800001	124950000	1573	0.276591	0.170392
1	124875001	125025000	1597	0.298871	0.195993
1	124950001	125100000	1470	0.316204	0.20607
1	125025001	125175000	1518	0.355702	0.201086
1	125100001	125250000	1862	0.363771	0.214182
1	125175001	125325000	2016	0.309558	0.201417
1	125250001	125400000	1595	0.360592	0.207714
1	125325001	125475000	1217	0.378381	0.191931
1	125400001	125550000	1496	0.272928	0.159323
1	125475001	125625000	1836	0.325416	0.193912
1	125550001	125700000	1838	0.365553	0.219938
1	125625001	125775000	1792	0.363525	0.206959
1	125700001	125850000	1721	0.384166	0.223677
1	125775001	125925000	1526	0.3627	0.211289
1	125850001	126000000	1629	0.295353	0.180545
1	125925001	126075000	944	0.30045	0.19737
1	126000001	126150000	161	0.324724	0.220367
1	126075001	126225000	145	0.331339	0.223693
1	126150001	126300000	198	0.342388	0.222253
1	126225001	126375000	1023	0.316011	0.21155
1	126300001	126450000	1992	0.322904	0.213259
1	126375001	126525000	1912	0.373628	0.2291
1	126450001	126600000	1417	0.390658	0.237994
1	126525001	126675000	952	0.338641	0.229437
1	126600001	126750000	785	0.358136	0.205663
1	126675001	126825000	1425	0.3656	0.220751
1	126750001	126900000	1755	0.365745	0.246089
1	126825001	126975000	1624	0.313931	0.200965
1	126900001	127050000	1917	0.284458	0.164498
1	126975001	127125000	1523	0.321001	0.182461
1	127050001	127200000	909	0.331208	0.199913
1	127125001	127275000	762	0.294539	0.208264
1	127200001	127350000	720	0.231798	0.184094
1	127275001	127425000	920	0.260377	0.191668
1	127350001	127500000	1212	0.358056	0.249572
1	127425001	127575000	1380	0.333819	0.231633
1	127500001	127650000	981	0.289573	0.196409
1	127575001	127725000	803	0.339513	0.212443
1	127650001	127800000	1144	0.271136	0.182475
1	127725001	127875000	1030	0.214355	0.159347
1	127800001	127950000	608	0.219913	0.15502
1	127875001	128025000	457	0.244917	0.151772
1	127950001	128100000	447	0.306119	0.175582
1	128025001	128175000	590	0.319411	0.179434
1	128100001	128250000	728	0.259687	0.156346
1	128175001	128325000	833	0.296776	0.191996
1	128250001	128400000	949	0.286372	0.196243
1	128325001	128475000	945	0.292863	0.207296
1	128400001	128550000	932	0.27415	0.198116
1	128475001	128625000	1004	0.154817	0.111178
1	128550001	128700000	2044	0.0818747	0.0726032
1	128625001	128775000	2134	0.0987416	0.0832255
1	128700001	128850000	1388	0.230629	0.159272
1	128775001	128925000	1420	0.304445	0.19099
1	128850001	129000000	1463	0.305105	0.196776
1	128925001	129075000	1916	0.266829	0.192651
1	129000001	129150000	1876	0.201437	0.14392
1	129075001	129225000	790	0.131703	0.0871172
1	129150001	129300000	428	0.388306	0.277002
1	129225001	129375000	918	0.301884	0.22278
1	129300001	129450000	1025	0.249855	0.175839
1	129375001	129525000	876	0.38288	0.241101
1	129450001	129600000	745	0.457161	0.273163
1	129525001	129675000	1013	0.429275	0.229848
1	129600001	129750000	1090	0.429181	0.23968
1	129675001	129825000	767	0.393369	0.210621
1	129750001	129900000	561	0.269884	0.136747
1	129825001	129975000	661	0.174124	0.121632
1	129900001	130050000	629	0.205282	0.140261
1	129975001	130125000	495	0.23874	0.1586
1	130050001	130200000	554	0.221026	0.142247
1	130125001	130275000	732	0.276757	0.165673
1	130200001	130350000	904	0.39512	0.250442
1	130275001	130425000	922	0.345099	0.208375
1	130350001	130500000	1074	0.199568	0.131399
1	130425001	130575000	1288	0.199999	0.144638
1	130500001	130650000	1442	0.163908	0.127179
1	130575001	130725000	1480	0.162362	0.12132
1	130650001	130800000	1407	0.169751	0.129717
1	130725001	130875000	1357	0.177684	0.145005
1	130800001	130950000	1102	0.196458	0.160733
1	130875001	131025000	852	0.229495	0.16535
1	130950001	131100000	1442	0.191927	0.137359
1	131025001	131175000	1954	0.153381	0.116297
1	131100001	131250000	1329	0.159265	0.127178
1	131175001	131325000	532	0.222699	0.167799
1	131250001	131400000	1155	0.12677	0.0916337
1	131325001	131475000	2005	0.136411	0.106519
1	131400001	131550000	1951	0.187604	0.144429
1	131475001	131625000	1676	0.229739	0.170875
1	131550001	131700000	1799	0.153391	0.123671
1	131625001	131775000	1939	0.114548	0.101652
1	131700001	131850000	1873	0.132884	0.115332
1	131775001	131925000	1994	0.119451	0.106405
1	131850001	132000000	1720	0.143799	0.120712
1	131925001	132075000	1142	0.177629	0.137758
1	132000001	132150000	1726	0.188201	0.136101
1	132075001	132225000	2332	0.189757	0.141042
1	132150001	132300000	2208	0.18066	0.132548
1	132225001	132375000	2031	0.212701	0.152051
1	132300001	132450000	1939	0.234557	0.168517
1	132375001	132525000	1875	0.174535	0.126849
1	132450001	132600000	1647	0.194794	0.143512
1	132525001	132675000	2046	0.20936	0.156212
1	132600001	132750000	2246	0.210089	0.15388
1	132675001	132825000	2240	0.23966	0.163935
1	132750001	132900000	2139	0.190289	0.130376
1	132825001	132975000	1074	0.146718	0.106339
1	132900001	133050000	1093	0.241959	0.174198
1	132975001	133125000	2234	0.221021	0.163947
1	133050001	133200000	2453	0.199884	0.160883
1	133125001	133275000	2509	0.21933	0.17731
1	133200001	133350000	2375	0.289589	0.221948
1	133275001	133425000	2038	0.313006	0.225892
1	133350001	133500000	2205	0.242178	0.159428
1	133425001	133575000	2374	0.16115	0.113642
1	133500001	133650000	1922	0.142252	0.111632
1	133575001	133725000	1802	0.210061	0.15706
1	133650001	133800000	1760	0.209188	0.151483
1	133725001	133875000	1243	0.20983	0.148684
1	133800001	133950000	641	0.251406	0.169492
1	133875001	134025000	1002	0.189404	0.134876
1	133950001	134100000	1801	0.200806	0.144728
1	134025001	134175000	1771	0.223919	0.157299
1	134100001	134250000	1907	0.159741	0.120633
1	134175001	134325000	2195	0.160193	0.125105
1	134250001	134400000	1961	0.168587	0.124702
1	134325001	134475000	1918	0.152539	0.103476
1	134400001	134550000	2146	0.199861	0.140963
1	134475001	134625000	1976	0.234464	0.164915
1	134550001	134700000	1486	0.257064	0.174929
1	134625001	134775000	1562	0.169448	0.129738
1	134700001	134850000	1967	0.116295	0.0971639
1	134775001	134925000	2245	0.177529	0.13689
1	134850001	135000000	2581	0.200557	0.158435
1	134925001	135075000	2380	0.138876	0.119247
1	135000001	135150000	1729	0.12084	0.102082
1	135075001	135225000	1698	0.172917	0.133811
1	135150001	135300000	1833	0.192016	0.150717
1	135225001	135375000	1917	0.220898	0.163605
1	135300001	135450000	1851	0.161872	0.124252
1	135375001	135525000	1769	0.149012	0.132711
1	135450001	135600000	2149	0.171737	0.140574
1	135525001	135675000	2173	0.17126	0.127178
1	135600001	135750000	1588	0.202467	0.140532
1	135675001	135825000	1554	0.185786	0.128971
1	135750001	135900000	2131	0.198302	0.140853
1	135825001	135975000	1997	0.205279	0.15094
1	135900001	136050000	1833	0.172321	0.138924
1	135975001	136125000	1981	0.156769	0.123729
1	136050001	136200000	1772	0.176487	0.122447
1	136125001	136275000	1531	0.175867	0.124988
1	136200001	136350000	1956	0.126746	0.108388
1	136275001	136425000	2335	0.160353	0.124091
1	136350001	136500000	1998	0.194962	0.141732
1	136425001	136575000	2066	0.158613	0.122713
1	136500001	136650000	2407	0.148007	0.111388
1	136575001	136725000	1275	0.178366	0.119269
1	136650001	136800000	148	0.322424	0.19262
1	136725001	136875000	984	0.160399	0.107683
1	136800001	136950000	2184	0.264217	0.170392
1	136875001	137025000	2089	0.313243	0.199718
1	136950001	137100000	1636	0.348871	0.218943
1	137025001	137175000	1073	0.356272	0.230872
1	137100001	137250000	572	0.236342	0.163461
1	137175001	137325000	1330	0.228801	0.173679
1	137250001	137400000	2184	0.377405	0.242246
1	137325001	137475000	1789	0.416486	0.245745
1	137400001	137550000	1554	0.153905	0.104892
1	137475001	137625000	1691	0.127009	0.0979992
1	137550001	137700000	1425	0.144953	0.121088
1	137625001	137775000	1840	0.298599	0.199333
1	137700001	137850000	2082	0.35224	0.237114
1	137775001	137925000	1777	0.355008	0.248946
1	137850001	138000000	1747	0.30884	0.218276
1	137925001	138075000	1711	0.212275	0.163904
1	138000001	138150000	1900	0.18417	0.141978
1	138075001	138225000	2343	0.177829	0.135802
1	138150001	138300000	2570	0.165967	0.130086
1	138225001	138375000	2226	0.186719	0.143478
1	138300001	138450000	1237	0.219546	0.162921
1	138375001	138525000	1382	0.16346	0.118472
1	138450001	138600000	1279	0.151263	0.111901
1	138525001	138675000	538	0.13463	0.0987698
1	138600001	138750000	1594	0.135918	0.103455
1	138675001	138825000	2212	0.153973	0.112397
1	138750001	138900000	2023	0.197266	0.13829
1	138825001	138975000	2221	0.250909	0.177256
1	138900001	139050000	2298	0.270527	0.184407
1	138975001	139125000	2200	0.219979	0.15246
1	139050001	139200000	2271	0.151491	0.117386
1	139125001	139275000	2326	0.182473	0.130829
1	139200001	139350000	1878	0.233659	0.154034
1	139275001	139425000	1391	0.252768	0.158619
1	139350001	139500000	1139	0.289064	0.170583
1	139425001	139575000	1328	0.299956	0.171729
1	139500001	139650000	1963	0.27024	0.169149
1	139575001	139725000	2152	0.215822	0.144317
1	139650001	139800000	2136	0.233351	0.156647
1	139725001	139875000	2488	0.235902	0.162229
1	139800001	139950000	2456	0.158438	0.114107
1	139875001	140025000	1625	0.097392	0.0817829
1	139950001	140100000	900	0.0969538	0.0782914
1	140025001	140175000	1051	0.194879	0.123553
1	140100001	140250000	768	0.225638	0.141859
1	140175001	140325000	282	0.269577	0.129346
1	140250001	140400000	1541	0.220453	0.14731
1	140325001	140475000	2564	0.204811	0.133209
1	140400001	140550000	1749	0.227142	0.138545
1	140475001	140625000	785	0.28641	0.183306
1	140550001	140700000	1378	0.211141	0.140809
1	140625001	140775000	2366	0.18181	0.128581
1	140700001	140850000	2334	0.17643	0.12811
1	140775001	140925000	1855	0.169058	0.12492
1	140850001	141000000	2227	0.129106	0.108643
1	140925001	141075000	2513	0.151432	0.125199
1	141000001	141150000	2345	0.196049	0.153466
1	141075001	141225000	2586	0.231386	0.167799
1	141150001	141300000	2538	0.233553	0.153348
1	141225001	141375000	2694	0.16986	0.114856
1	141300001	141450000	2510	0.176292	0.11265
1	141375001	141525000	1672	0.226277	0.141439
1	141450001	141600000	1984	0.375868	0.26254
1	141525001	141675000	2071	0.403957	0.277094
1	141600001	141750000	861	0.333185	0.215973
1	141675001	141825000	298	0.215169	0.139933
1	141750001	141900000	265	0.31166	0.202327
1	141825001	141975000	342	0.298016	0.158577
1	141900001	142050000	1089	0.285036	0.178988
1	141975001	142125000	2307	0.283259	0.197784
1	142050001	142200000	2617	0.236269	0.162565
1	142125001	142275000	3065	0.14341	0.107345
1	142200001	142350000	3754	0.200031	0.144251
1	142275001	142425000	3095	0.222398	0.159728
1	142350001	142500000	2596	0.140469	0.115464
1	142425001	142575000	1425	0.137055	0.118013
1	142500001	142650000	329	0.202372	0.127633
1	142575001	142725000	1090	0.19025	0.119923
1	142650001	142800000	1158	0.208194	0.125867
1	142725001	142875000	862	0.13248	0.0956391
1	142800001	142950000	706	0.082841	0.0642157
1	142875001	143025000	1446	0.134664	0.0975794
1	142950001	143100000	2052	0.13533	0.102713
1	143025001	143175000	890	0.147602	0.112705
1	143100001	143250000	228	0.211372	0.152487
1	143175001	143325000	1119	0.264716	0.1818
1	143250001	143400000	1502	0.28343	0.174285
1	143325001	143475000	670	0.313008	0.143644
1	143400001	143550000	710	0.370263	0.216369
1	143475001	143625000	1497	0.318548	0.204446
1	143550001	143700000	2028	0.225514	0.15448
1	143625001	143775000	2445	0.147647	0.109705
1	143700001	143850000	2262	0.126694	0.0977906
1	143775001	143925000	2223	0.144083	0.113158
1	143850001	144000000	2004	0.185363	0.147868
1	143925001	144075000	1067	0.208597	0.173766
1	144000001	144150000	1756	0.191782	0.152027
1	144075001	144225000	2943	0.142078	0.117022
1	144150001	144300000	1920	0.0931931	0.0797706
1	144225001	144375000	629	0.136452	0.0906442
1	144300001	144450000	375	0.187493	0.123988
1	144375001	144525000	929	0.404263	0.270789
1	144450001	144600000	1605	0.348796	0.210861
1	144525001	144675000	2238	0.241543	0.165876
1	144600001	144750000	2707	0.21018	0.148751
1	144675001	144825000	2425	0.21236	0.116288
1	144750001	144900000	2483	0.314836	0.184064
1	144825001	144975000	2406	0.304607	0.217492
1	144900001	145050000	1316	0.279621	0.195337
1	144975001	145125000	588	0.236223	0.141437
1	145050001	145200000	748	0.176423	0.135121
1	145125001	145275000	1963	0.216207	0.161769
1	145200001	145350000	2503	0.229424	0.168261
1	145275001	145425000	1834	0.174826	0.13022
1	145350001	145500000	1267	0.103899	0.0868375
1	145425001	145575000	1155	0.156172	0.119889
1	145500001	145650000	1574	0.181575	0.13244
1	145575001	145725000	856	0.199983	0.1386
1	145650001	145800000	780	0.178098	0.132708
1	145725001	145875000	1599	0.127077	0.0939
1	145800001	145950000	1971	0.106994	0.0822681
1	145875001	146025000	2322	0.124438	0.0990834
1	145950001	146100000	1952	0.227657	0.146383
1	146025001	146175000	1657	0.341718	0.210637
1	146100001	146250000	1911	0.264489	0.168889
1	146175001	146325000	2073	0.215248	0.145309
1	146250001	146400000	2256	0.237887	0.157445
1	146325001	146475000	2458	0.22397	0.150924
1	146400001	146550000	2695	0.23035	0.149963
1	146475001	146625000	2160	0.324425	0.201955
1	146550001	146700000	1692	0.312442	0.204762
1	146625001	146775000	2064	0.208879	0.144655
1	146700001	146850000	2096	0.205891	0.142019
1	146775001	146925000	1685	0.209238	0.141954
1	146850001	147000000	891	0.223967	0.146654
1	146925001	147075000	557	0.194957	0.13647
1	147000001	147150000	1484	0.1461	0.120668
1	147075001	147225000	1659	0.144581	0.119584
1	147150001	147300000	1366	0.195453	0.149761
1	147225001	147375000	1782	0.194097	0.146273
1	147300001	147450000	1978	0.172495	0.130184
1	147375001	147525000	2079	0.199608	0.143947
1	147450001	147600000	1406	0.253615	0.173054
1	147525001	147675000	362	0.328047	0.211183
1	147600001	147750000	699	0.217969	0.128352
1	147675001	147825000	2036	0.204919	0.142227
1	147750001	147900000	1403	0.199349	0.145457
1	147825001	147975000	644	0.157388	0.113062
1	147900001	148050000	1648	0.212624	0.142144
1	147975001	148125000	2027	0.235203	0.165853
1	148050001	148200000	2263	0.233503	0.167293
1	148125001	148275000	2501	0.247599	0.167727
1	148200001	148350000	2224	0.213609	0.141164
1	148275001	148425000	1977	0.173686	0.117234
1	148350001	148500000	1936	0.188439	0.133822
1	148425001	148575000	1341	0.174656	0.139278
1	148500001	148650000	1881	0.106996	0.089254
1	148575001	148725000	2844	0.0972473	0.0789814
1	148650001	148800000	1515	0.106241	0.0835604
1	148725001	148875000	408	0.0916915	0.075216
1	148800001	148950000	388	0.0803016	0.0739471
1	148875001	149025000	1201	0.0728289	0.0609182
1	148950001	149100000	2602	0.114105	0.0897773
1	149025001	149175000	2709	0.106207	0.0878288
1	149100001	149250000	2641	0.115788	0.0904875
1	149175001	149325000	2529	0.138508	0.1013
1	149250001	149400000	2575	0.106057	0.0856105
1	149325001	149475000	2838	0.119727	0.0982549
1	149400001	149550000	2209	0.14695	0.110571
1	149475001	149625000	954	0.169194	0.11419
1	149550001	149700000	1579	0.125677	0.0968336
1	149625001	149775000	2834	0.138736	0.107049
1	149700001	149850000	2351	0.1591	0.118665
1	149775001	149925000	1744	0.146034	0.112038
[truncated: 35,468 more rows]

## Sheet: Table S9
Table S9.Ucleotide diversity θπ (θπWS / θπEFS) for EFS and WS populations
CHROM	BIN_START	BIN_END	WILD_PI/EF_PI
1	1	150000	2.61852
1	75001	225000	2.96292
1	150001	300000	4.19388
1	225001	375000	3.42438
1	300001	450000	2.91857
1	375001	525000	2.50311
1	450001	600000	2.35448
1	525001	675000	2.08575
1	600001	750000	2.26779
1	675001	825000	1.87233
1	750001	900000	1.55222
1	825001	975000	1.99502
1	900001	1050000	2.30231
1	975001	1125000	2.13013
1	1050001	1200000	2.42864
1	1125001	1275000	2.74716
1	1200001	1350000	3.04076
1	1275001	1425000	2.45914
1	1350001	1500000	2.6836
1	1425001	1575000	3.00542
1	1500001	1650000	2.19814
1	1575001	1725000	2.18155
1	1650001	1800000	2.55245
1	1725001	1875000	2.39847
1	1800001	1950000	2.45757
1	1875001	2025000	2.7365
1	1950001	2100000	2.8082
1	2025001	2175000	2.80789
1	2100001	2250000	3.33741
1	2175001	2325000	3.53656
1	2250001	2400000	2.70565
1	2325001	2475000	2.14379
1	2400001	2550000	2.38903
1	2475001	2625000	2.37906
1	2550001	2700000	2.06107
1	2625001	2775000	2.1072
1	2700001	2850000	2.44821
1	2775001	2925000	2.48062
1	2850001	3000000	2.23003
1	2925001	3075000	2.24718
1	3000001	3150000	2.16935
1	3075001	3225000	2.36859
1	3150001	3300000	2.30842
1	3225001	3375000	2.646
1	3300001	3450000	3.67042
1	3375001	3525000	2.75899
1	3450001	3600000	2.27711
1	3525001	3675000	2.21657
1	3600001	3750000	2.46467
1	3675001	3825000	3.33768
1	3750001	3900000	2.95596
1	3825001	3975000	2.22275
1	3900001	4050000	2.2087
1	3975001	4125000	2.23785
1	4050001	4200000	1.94601
1	4125001	4275000	2.09354
1	4200001	4350000	2.61008
1	4275001	4425000	2.51995
1	4350001	4500000	2.03393
1	4425001	4575000	1.78292
1	4500001	4650000	1.99847
1	4575001	4725000	2.5653
1	4650001	4800000	2.72797
1	4725001	4875000	2.63553
1	4800001	4950000	2.47534
1	4875001	5025000	2.68899
1	4950001	5100000	2.5763
1	5025001	5175000	2.42994
1	5100001	5250000	2.51827
1	5175001	5325000	2.81229
1	5250001	5400000	3.08383
1	5325001	5475000	3.20748
1	5400001	5550000	3.73175
1	5475001	5625000	4.20184
1	5550001	5700000	3.42501
1	5625001	5775000	3.02522
1	5700001	5850000	3.25183
1	5775001	5925000	3.47562
1	5850001	6000000	4.05469
1	5925001	6075000	3.55625
1	6000001	6150000	2.5576
1	6075001	6225000	2.77629
1	6150001	6300000	2.75405
1	6225001	6375000	2.67386
1	6300001	6450000	2.9693
1	6375001	6525000	3.5183
1	6450001	6600000	3.47552
1	6525001	6675000	4.32677
1	6600001	6750000	3.80202
1	6675001	6825000	3.49364
1	6750001	6900000	3.16611
1	6825001	6975000	2.35492
1	6900001	7050000	3.61633
1	6975001	7125000	4.00116
1	7050001	7200000	2.46701
1	7125001	7275000	2.46873
1	7200001	7350000	2.59634
1	7275001	7425000	3.09733
1	7350001	7500000	4.31339
1	7425001	7575000	5.09124
1	7500001	7650000	6.57651
1	7575001	7725000	5.66772
1	7650001	7800000	4.03835
1	7725001	7875000	2.95565
1	7800001	7950000	2.91684
1	7875001	8025000	2.79668
1	7950001	8100000	2.28113
1	8025001	8175000	2.14588
1	8100001	8250000	2.17052
1	8175001	8325000	2.05666
1	8250001	8400000	2.00488
1	8325001	8475000	2.19303
1	8400001	8550000	2.18293
1	8475001	8625000	1.79814
1	8550001	8700000	2.03352
1	8625001	8775000	2.45248
1	8700001	8850000	2.51497
1	8775001	8925000	2.23074
1	8850001	9000000	2.15661
1	8925001	9075000	2.22805
1	9000001	9150000	2.287
1	9075001	9225000	2.53956
1	9150001	9300000	3.56837
1	9225001	9375000	3.68956
1	9300001	9450000	2.45383
1	9375001	9525000	2.38915
1	9450001	9600000	3.02571
1	9525001	9675000	2.60048
1	9600001	9750000	2.43729
1	9675001	9825000	2.366
1	9750001	9900000	2.22926
1	9825001	9975000	2.43419
1	9900001	10050000	2.8752
1	9975001	10125000	2.53701
1	10050001	10200000	2.14131
1	10125001	10275000	2.31737
1	10200001	10350000	2.36223
1	10275001	10425000	2.5389
1	10350001	10500000	4.21451
1	10425001	10575000	5.87383
1	10500001	10650000	2.84202
1	10575001	10725000	2.39914
1	10650001	10800000	6.7021
1	10725001	10875000	3.57066
1	10800001	10950000	2.40384
1	10875001	11025000	2.00647
1	10950001	11100000	1.98542
1	11025001	11175000	2.40317
1	11100001	11250000	2.99234
1	11175001	11325000	2.31578
1	11250001	11400000	2.07057
1	11325001	11475000	2.41243
1	11400001	11550000	2.08386
1	11475001	11625000	1.92353
1	11550001	11700000	2.27375
1	11625001	11775000	2.13122
1	11700001	11850000	2.13254
1	11775001	11925000	2.15436
1	11850001	12000000	2.34489
1	11925001	12075000	2.94201
1	12000001	12150000	2.56787
1	12075001	12225000	2.63255
1	12150001	12300000	2.52404
1	12225001	12375000	2.27974
1	12300001	12450000	2.2815
1	12375001	12525000	2.12632
1	12450001	12600000	2.29914
1	12525001	12675000	3.66317
1	12600001	12750000	2.74571
1	12675001	12825000	2.2726
1	12750001	12900000	2.1993
1	12825001	12975000	2.25882
1	12900001	13050000	2.33283
1	12975001	13125000	2.42137
1	13050001	13200000	3.40386
1	13125001	13275000	4.18167
1	13200001	13350000	2.66312
1	13275001	13425000	2.82307
1	13350001	13500000	3.16358
1	13425001	13575000	3.55891
1	13500001	13650000	3.29434
1	13575001	13725000	3.09032
1	13650001	13800000	3.2944
1	13725001	13875000	2.89899
1	13800001	13950000	2.5486
1	13875001	14025000	2.69498
1	13950001	14100000	2.48081
1	14025001	14175000	2.11755
1	14100001	14250000	2.24786
1	14175001	14325000	2.57776
1	14250001	14400000	2.77924
1	14325001	14475000	2.98137
1	14400001	14550000	3.142
1	14475001	14625000	3.01753
1	14550001	14700000	2.66875
1	14625001	14775000	2.7863
1	14700001	14850000	3.07835
1	14775001	14925000	2.80319
1	14850001	15000000	2.3593
1	14925001	15075000	2.07337
1	15000001	15150000	2.01805
1	15075001	15225000	2.18836
1	15150001	15300000	2.84724
1	15225001	15375000	3.01683
1	15300001	15450000	2.58743
1	15375001	15525000	2.57442
1	15450001	15600000	2.4854
1	15525001	15675000	2.18285
1	15600001	15750000	2.07327
1	15675001	15825000	2.05703
1	15750001	15900000	2.08579
1	15825001	15975000	2.39242
1	15900001	16050000	2.56323
1	15975001	16125000	2.41443
1	16050001	16200000	2.2458
1	16125001	16275000	2.26571
1	16200001	16350000	2.23989
1	16275001	16425000	2.37436
1	16350001	16500000	2.57351
1	16425001	16575000	2.36973
1	16500001	16650000	1.82772
1	16575001	16725000	1.87738
1	16650001	16800000	2.31681
1	16725001	16875000	3.00989
1	16800001	16950000	2.86985
1	16875001	17025000	2.33088
1	16950001	17100000	2.35765
1	17025001	17175000	2.5783
1	17100001	17250000	2.72319
1	17175001	17325000	2.57205
1	17250001	17400000	2.78334
1	17325001	17475000	3.45934
1	17400001	17550000	3.80917
1	17475001	17625000	3.2016
1	17550001	17700000	3.67087
1	17625001	17775000	4.55738
1	17700001	17850000	3.36826
1	17775001	17925000	2.47913
1	17850001	18000000	2.53315
1	17925001	18075000	2.6063
1	18000001	18150000	2.3445
1	18075001	18225000	2.29952
1	18150001	18300000	2.46781
1	18225001	18375000	2.62194
1	18300001	18450000	2.98119
1	18375001	18525000	2.58314
1	18450001	18600000	2.18065
1	18525001	18675000	2.36891
1	18600001	18750000	2.15049
1	18675001	18825000	2.01032
1	18750001	18900000	2.23104
1	18825001	18975000	2.67054
1	18900001	19050000	2.75517
1	18975001	19125000	2.39216
1	19050001	19200000	2.17643
1	19125001	19275000	2.22422
1	19200001	19350000	2.54322
1	19275001	19425000	2.998
1	19350001	19500000	2.96381
1	19425001	19575000	2.24038
1	19500001	19650000	1.93914
1	19575001	19725000	2.05266
1	19650001	19800000	2.29041
1	19725001	19875000	2.26712
1	19800001	19950000	2.16164
1	19875001	20025000	1.97293
1	19950001	20100000	1.99066
1	20025001	20175000	2.09213
1	20100001	20250000	3.16175
1	20175001	20325000	4.75288
1	20250001	20400000	3.39679
1	20325001	20475000	2.67562
1	20400001	20550000	2.71278
1	20475001	20625000	2.93534
1	20550001	20700000	2.88835
1	20625001	20775000	2.26717
1	20700001	20850000	2.41976
1	20775001	20925000	2.36551
1	20850001	21000000	1.87826
1	20925001	21075000	2.35496
1	21000001	21150000	3.4757
1	21075001	21225000	6.57837
1	21150001	21300000	10.7867
1	21225001	21375000	5.82031
1	21300001	21450000	3.65501
1	21375001	21525000	5.48625
1	21450001	21600000	6.12875
1	21525001	21675000	3.04056
1	21600001	21750000	2.57903
1	21675001	21825000	2.75107
1	21750001	21900000	2.94473
1	21825001	21975000	2.8869
1	21900001	22050000	3.46922
1	21975001	22125000	3.52451
1	22050001	22200000	3.66948
1	22125001	22275000	3.98762
1	22200001	22350000	3.717
1	22275001	22425000	3.73236
1	22350001	22500000	2.85591
1	22425001	22575000	3.59323
1	22500001	22650000	5.74212
1	22575001	22725000	5.08851
1	22650001	22800000	3.35377
1	22725001	22875000	2.46199
1	22800001	22950000	2.18031
1	22875001	23025000	1.90702
1	22950001	23100000	1.79204
1	23025001	23175000	2.10983
1	23100001	23250000	2.33843
1	23175001	23325000	2.39659
1	23250001	23400000	2.69144
1	23325001	23475000	2.13185
1	23400001	23550000	2.0387
1	23475001	23625000	3.20497
1	23550001	23700000	3.13021
1	23625001	23775000	2.89485
1	23700001	23850000	2.31914
1	23775001	23925000	2.11875
1	23850001	24000000	2.95452
1	23925001	24075000	2.67176
1	24000001	24150000	2.11069
1	24075001	24225000	2.41085
1	24150001	24300000	2.05756
1	24225001	24375000	2.09583
1	24300001	24450000	2.13917
1	24375001	24525000	2.50473
1	24450001	24600000	6.21044
1	24525001	24675000	4.31661
1	24600001	24750000	2.0805
1	24675001	24825000	2.03321
1	24750001	24900000	2.67567
1	24825001	24975000	3.47144
1	24900001	25050000	3.37408
1	24975001	25125000	30.3439
1	25050001	25200000	2.52953
1	25125001	25275000	3.30286
1	25200001	25350000	5.76237
1	25275001	25425000	3.35193
1	25350001	25500000	3.16004
1	25425001	25575000	2.63194
1	25500001	25650000	2.09878
1	25575001	25725000	3.10625
1	25650001	25800000	2.88617
1	25725001	25875000	3.25604
1	25800001	25950000	2.9127
1	25875001	26025000	2.13172
1	25950001	26100000	2.48241
1	26025001	26175000	2.25068
1	26100001	26250000	2.31693
1	26175001	26325000	3.39298
1	26250001	26400000	3.05471
1	26325001	26475000	1.94344
1	26400001	26550000	2.12286
1	26475001	26625000	3.16385
1	26550001	26700000	8.93903
1	26625001	26775000	13.8222
1	26700001	26850000	13.6523
1	26775001	26925000	11.4514
1	26850001	27000000	12.5608
1	26925001	27075000	9.02617
1	27000001	27150000	3.97077
1	27075001	27225000	3.11167
1	27150001	27300000	2.99277
1	27225001	27375000	3.29213
1	27300001	27450000	2.99279
1	27375001	27525000	2.99426
1	27450001	27600000	2.68171
1	27525001	27675000	2.5264
1	27600001	27750000	6.24105
1	27675001	27825000	10.5141
1	27750001	27900000	2.73502
1	27825001	27975000	2.21457
1	27900001	28050000	1.95412
1	27975001	28125000	2.39612
1	28050001	28200000	2.14911
1	28125001	28275000	1.73395
1	28200001	28350000	2.24094
1	28275001	28425000	2.69925
1	28350001	28500000	1.95973
1	28425001	28575000	1.45221
1	28500001	28650000	2.01175
1	28575001	28725000	2.40615
1	28650001	28800000	2.27572
1	28725001	28875000	2.17998
1	28800001	28950000	2.17392
1	28875001	29025000	2.60508
1	28950001	29100000	2.99006
1	29025001	29175000	3.37461
1	29100001	29250000	2.27144
1	29175001	29325000	2.20298
1	29250001	29400000	4.71619
1	29325001	29475000	9.19375
1	29400001	29550000	5.56773
1	29475001	29625000	3.06471
1	29550001	29700000	2.33375
1	29625001	29775000	2.9737
1	29700001	29850000	2.73641
1	29775001	29925000	2.25836
1	29850001	30000000	2.39609
1	29925001	30075000	2.54187
1	30000001	30150000	2.54857
1	30075001	30225000	2.49444
1	30150001	30300000	2.43635
1	30225001	30375000	1.98163
1	30300001	30450000	1.68027
1	30375001	30525000	1.95183
1	30450001	30600000	2.34069
1	30525001	30675000	2.22464
1	30600001	30750000	2.35048
1	30675001	30825000	3.13361
1	30750001	30900000	3.05473
1	30825001	30975000	2.17022
1	30900001	31050000	2.37216
1	30975001	31125000	2.4128
1	31050001	31200000	2.54528
1	31125001	31275000	2.91265
1	31200001	31350000	2.61281
1	31275001	31425000	2.88191
1	31350001	31500000	3.0895
1	31425001	31575000	2.67446
1	31500001	31650000	2.55858
1	31575001	31725000	2.29817
1	31650001	31800000	2.02861
1	31725001	31875000	2.00175
1	31800001	31950000	2.14423
1	31875001	32025000	2.11395
1	31950001	32100000	2.32156
1	32025001	32175000	2.07471
1	32100001	32250000	1.85534
1	32175001	32325000	2.21275
1	32250001	32400000	2.68346
1	32325001	32475000	2.40091
1	32400001	32550000	2.27807
1	32475001	32625000	2.24619
1	32550001	32700000	1.7489
1	32625001	32775000	2.27741
1	32700001	32850000	2.6785
1	32775001	32925000	2.17391
1	32850001	33000000	2.3273
1	32925001	33075000	2.25619
1	33000001	33150000	2.09968
1	33075001	33225000	2.40488
1	33150001	33300000	2.5061
1	33225001	33375000	2.43492
1	33300001	33450000	2.11802
1	33375001	33525000	1.85771
1	33450001	33600000	2.02206
1	33525001	33675000	2.35718
1	33600001	33750000	2.64039
1	33675001	33825000	2.57609
1	33750001	33900000	2.30114
1	33825001	33975000	2.22885
1	33900001	34050000	2.47766
1	33975001	34125000	2.56985
1	34050001	34200000	3.11583
1	34125001	34275000	4.05759
1	34200001	34350000	2.82641
1	34275001	34425000	2.26507
1	34350001	34500000	2.12754
1	34425001	34575000	2.00864
1	34500001	34650000	2.27313
1	34575001	34725000	2.24391
1	34650001	34800000	2.00423
1	34725001	34875000	1.93101
1	34800001	34950000	2.0722
1	34875001	35025000	2.70258
1	34950001	35100000	3.04764
1	35025001	35175000	2.59342
1	35100001	35250000	2.40468
1	35175001	35325000	2.94274
1	35250001	35400000	3.30032
1	35325001	35475000	2.31803
1	35400001	35550000	1.96657
1	35475001	35625000	2.34126
1	35550001	35700000	3.78209
1	35625001	35775000	4.89717
1	35700001	35850000	5.80521
1	35775001	35925000	2.50234
1	35850001	36000000	2.29226
1	35925001	36075000	2.1391
1	36000001	36150000	2.5406
1	36075001	36225000	2.53283
1	36150001	36300000	2.42622
1	36225001	36375000	3.05987
1	36300001	36450000	2.36655
1	36375001	36525000	2.02299
1	36450001	36600000	2.48553
1	36525001	36675000	2.88951
1	36600001	36750000	2.60222
1	36675001	36825000	2.26041
1	36750001	36900000	2.29597
1	36825001	36975000	2.08998
1	36900001	37050000	1.99925
1	36975001	37125000	1.9343
1	37050001	37200000	2.52022
1	37125001	37275000	3.23786
1	37200001	37350000	2.52136
1	37275001	37425000	2.41502
1	37350001	37500000	2.29156
1	37425001	37575000	2.545
1	37500001	37650000	2.59916
1	37575001	37725000	2.13857
1	37650001	37800000	1.82635
1	37725001	37875000	2.00215
1	37800001	37950000	2.08333
1	37875001	38025000	2.45331
1	37950001	38100000	2.76942
1	38025001	38175000	2.58021
1	38100001	38250000	2.46401
1	38175001	38325000	2.24305
1	38250001	38400000	1.92759
1	38325001	38475000	2.40171
1	38400001	38550000	2.07793
1	38475001	38625000	1.95695
1	38550001	38700000	3.96371
1	38625001	38775000	3.47427
1	38700001	38850000	2.75305
1	38775001	38925000	3.12728
1	38850001	39000000	2.54315
1	38925001	39075000	2.65775
1	39000001	39150000	2.77324
1	39075001	39225000	3.1442
1	39150001	39300000	3.52928
1	39225001	39375000	3.39411
1	39300001	39450000	3.56452
1	39375001	39525000	3.30777
1	39450001	39600000	2.85186
1	39525001	39675000	2.53674
1	39600001	39750000	3.54536
1	39675001	39825000	4.19301
1	39750001	39900000	3.22002
1	39825001	39975000	5.59474
1	39900001	40050000	6.45648
1	39975001	40125000	5.80606
1	40050001	40200000	6.93333
1	40125001	40275000	3.87664
1	40200001	40350000	2.75152
1	40275001	40425000	3.01595
1	40350001	40500000	2.64377
1	40425001	40575000	2.48313
1	40500001	40650000	2.31513
1	40575001	40725000	2.70094
1	40650001	40800000	3.75473
1	40725001	40875000	2.95796
1	40800001	40950000	2.75843
1	40875001	41025000	2.77694
1	40950001	41100000	2.44378
1	41025001	41175000	1.86822
1	41100001	41250000	1.81188
1	41175001	41325000	2.1432
1	41250001	41400000	2.27455
1	41325001	41475000	2.95412
1	41400001	41550000	3.27256
1	41475001	41625000	4.1997
1	41550001	41700000	6.68957
1	41625001	41775000	7.49875
1	41700001	41850000	5.13316
1	41775001	41925000	3.49343
1	41850001	42000000	3.14967
1	41925001	42075000	3.20758
1	42000001	42150000	3.21886
1	42075001	42225000	2.9647
1	42150001	42300000	3.06708
1	42225001	42375000	3.38098
1	42300001	42450000	3.52231
1	42375001	42525000	3.04756
1	42450001	42600000	2.5906
1	42525001	42675000	2.6619
1	42600001	42750000	2.76135
1	42675001	42825000	2.95603
1	42750001	42900000	3.07626
1	42825001	42975000	2.47393
1	42900001	43050000	2.1889
1	42975001	43125000	2.50748
1	43050001	43200000	4.14142
1	43125001	43275000	4.81448
1	43200001	43350000	4.27241
1	43275001	43425000	4.84667
1	43350001	43500000	4.53333
1	43425001	43575000	5.18462
1	43500001	43650000	3.86007
1	43575001	43725000	2.99542
1	43650001	43800000	2.86852
1	43725001	43875000	4.11392
1	43800001	43950000	4.36604
1	43875001	44025000	4.00252
1	43950001	44100000	3.32069
1	44025001	44175000	2.83622
1	44100001	44250000	2.81622
1	44175001	44325000	2.84608
1	44250001	44400000	2.69973
1	44325001	44475000	3.06904
1	44400001	44550000	3.1289
1	44475001	44625000	2.99017
1	44550001	44700000	3.21302
1	44625001	44775000	2.72681
1	44700001	44850000	2.63957
1	44775001	44925000	1.9954
1	44850001	45000000	2.3038
1	44925001	45075000	2.44503
1	45000001	45150000	2.63073
1	45075001	45225000	2.83777
1	45150001	45300000	2.5929
1	45225001	45375000	2.19012
1	45300001	45450000	2.22468
1	45375001	45525000	2.12365
1	45450001	45600000	2.04988
1	45525001	45675000	2.63761
1	45600001	45750000	2.381
1	45675001	45825000	2.23549
1	45750001	45900000	2.28093
1	45825001	45975000	2.86504
1	45900001	46050000	2.41254
1	45975001	46125000	1.81551
1	46050001	46200000	2.6191
1	46125001	46275000	2.60362
1	46200001	46350000	2.20949
1	46275001	46425000	2.16238
1	46350001	46500000	2.36142
1	46425001	46575000	2.31353
1	46500001	46650000	2.24465
1	46575001	46725000	2.3314
1	46650001	46800000	2.84429
1	46725001	46875000	2.84718
1	46800001	46950000	2.66075
1	46875001	47025000	2.4064
1	46950001	47100000	2.19972
1	47025001	47175000	2.25485
1	47100001	47250000	2.43341
1	47175001	47325000	2.53322
1	47250001	47400000	2.15369
1	47325001	47475000	1.86991
1	47400001	47550000	5.94713
1	47475001	47625000	2.68749
1	47550001	47700000	2.11776
1	47625001	47775000	1.85093
1	47700001	47850000	1.83769
1	47775001	47925000	2.19303
1	47850001	48000000	2.80879
1	47925001	48075000	3.12578
1	48000001	48150000	2.36622
1	48075001	48225000	1.98938
1	48150001	48300000	2.32125
1	48225001	48375000	2.72404
1	48300001	48450000	2.31839
1	48375001	48525000	2.6581
1	48450001	48600000	3.52903
1	48525001	48675000	3.15365
1	48600001	48750000	3.10314
1	48675001	48825000	3.1948
1	48750001	48900000	4.45437
1	48825001	48975000	5.0385
1	48900001	49050000	4.32923
1	48975001	49125000	3.72318
1	49050001	49200000	3.00909
1	49125001	49275000	3.18458
1	49200001	49350000	2.71331
1	49275001	49425000	2.60383
1	49350001	49500000	3.17845
1	49425001	49575000	2.58351
1	49500001	49650000	2.73453
1	49575001	49725000	2.87106
1	49650001	49800000	2.96599
1	49725001	49875000	2.80904
1	49800001	49950000	2.35144
1	49875001	50025000	2.39822
1	49950001	50100000	2.76139
1	50025001	50175000	2.4767
1	50100001	50250000	2.5166
1	50175001	50325000	3.90528
1	50250001	50400000	3.72469
1	50325001	50475000	3.15952
1	50400001	50550000	2.30883
1	50475001	50625000	2.13178
1	50550001	50700000	3.17597
1	50625001	50775000	4.96522
1	50700001	50850000	4.29819
1	50775001	50925000	3.0751
1	50850001	51000000	2.54548
1	50925001	51075000	2.23693
1	51000001	51150000	2.25241
1	51075001	51225000	2.2059
1	51150001	51300000	2.23739
1	51225001	51375000	2.72668
1	51300001	51450000	3.35483
1	51375001	51525000	3.14602
1	51450001	51600000	2.91387
1	51525001	51675000	2.54093
1	51600001	51750000	2.6801
1	51675001	51825000	2.96544
1	51750001	51900000	2.59555
1	51825001	51975000	2.36941
1	51900001	52050000	2.80197
1	51975001	52125000	2.75292
1	52050001	52200000	2.25454
1	52125001	52275000	2.22946
1	52200001	52350000	2.46531
1	52275001	52425000	2.47437
1	52350001	52500000	2.84298
1	52425001	52575000	2.53508
1	52500001	52650000	2.0322
1	52575001	52725000	2.37397
1	52650001	52800000	2.69589
1	52725001	52875000	2.06972
1	52800001	52950000	2.15363
1	52875001	53025000	2.64232
1	52950001	53100000	2.66681
1	53025001	53175000	2.87018
1	53100001	53250000	2.78961
1	53175001	53325000	2.24238
1	53250001	53400000	2.25402
1	53325001	53475000	2.35972
1	53400001	53550000	2.25783
1	53475001	53625000	2.50055
1	53550001	53700000	2.90801
1	53625001	53775000	3.42919
1	53700001	53850000	2.11623
1	53775001	53925000	2.85341
1	53850001	54000000	3.11351
1	53925001	54075000	2.63055
1	54000001	54150000	3.05484
1	54075001	54225000	3.44453
1	54150001	54300000	3.72119
1	54225001	54375000	4.40882
1	54300001	54450000	3.64687
1	54375001	54525000	2.90244
1	54450001	54600000	2.75926
1	54525001	54675000	3.09837
1	54600001	54750000	3.75726
1	54675001	54825000	4.32609
1	54750001	54900000	3.69608
1	54825001	54975000	3.5015
1	54900001	55050000	3.47152
1	54975001	55125000	3.44782
1	55050001	55200000	3.42125
1	55125001	55275000	4.17972
1	55200001	55350000	6.82901
1	55275001	55425000	16.0848
1	55350001	55500000	5.4645
1	55425001	55575000	3.53622
1	55500001	55650000	2.97152
1	55575001	55725000	2.18162
1	55650001	55800000	3.0205
1	55725001	55875000	4.21688
1	55800001	55950000	3.65301
1	55875001	56025000	3.13059
1	55950001	56100000	2.9927
1	56025001	56175000	2.67693
1	56100001	56250000	3.01214
1	56175001	56325000	5.26087
1	56250001	56400000	2.80814
1	56325001	56475000	2.29042
1	56400001	56550000	2.28309
1	56475001	56625000	2.1537
1	56550001	56700000	2.23634
1	56625001	56775000	2.4907
1	56700001	56850000	2.24397
1	56775001	56925000	1.93942
1	56850001	57000000	2.06884
1	56925001	57075000	2.19581
1	57000001	57150000	2.28439
1	57075001	57225000	2.50478
1	57150001	57300000	2.31836
1	57225001	57375000	2.39132
1	57300001	57450000	2.30945
1	57375001	57525000	2.59861
1	57450001	57600000	3.02285
1	57525001	57675000	2.67532
1	57600001	57750000	2.90313
1	57675001	57825000	2.49498
1	57750001	57900000	2.15495
1	57825001	57975000	2.27375
1	57900001	58050000	2.85139
1	57975001	58125000	2.71736
1	58050001	58200000	2.557
1	58125001	58275000	2.5976
1	58200001	58350000	2.12849
1	58275001	58425000	2.02752
1	58350001	58500000	1.73494
1	58425001	58575000	1.71045
1	58500001	58650000	2.16287
1	58575001	58725000	2.41056
1	58650001	58800000	2.62837
1	58725001	58875000	3.58309
1	58800001	58950000	5.67417
1	58875001	59025000	5.05612
1	58950001	59100000	3.94727
1	59025001	59175000	2.90537
1	59100001	59250000	4.16045
1	59175001	59325000	4.25057
1	59250001	59400000	2.52346
1	59325001	59475000	2.84936
1	59400001	59550000	3.01906
1	59475001	59625000	2.66277
1	59550001	59700000	2.72075
1	59625001	59775000	2.73143
1	59700001	59850000	2.85226
1	59775001	59925000	3.20052
1	59850001	60000000	2.88401
1	59925001	60075000	2.50611
1	60000001	60150000	2.28003
1	60075001	60225000	2.61206
1	60150001	60300000	3.76943
1	60225001	60375000	3.77507
1	60300001	60450000	3.69102
1	60375001	60525000	3.88133
1	60450001	60600000	4.39499
1	60525001	60675000	3.94578
1	60600001	60750000	2.44452
1	60675001	60825000	2.16438
1	60750001	60900000	2.11896
1	60825001	60975000	2.04883
1	60900001	61050000	2.03146
1	60975001	61125000	1.90483
1	61050001	61200000	1.91448
1	61125001	61275000	2.67495
1	61200001	61350000	3.02118
1	61275001	61425000	2.14772
1	61350001	61500000	2.30029
1	61425001	61575000	2.75322
1	61500001	61650000	2.28954
1	61575001	61725000	1.92623
1	61650001	61800000	2.33867
1	61725001	61875000	2.29153
1	61800001	61950000	2.24439
1	61875001	62025000	2.22376
1	61950001	62100000	2.22311
1	62025001	62175000	2.38173
1	62100001	62250000	2.23041
1	62175001	62325000	2.15386
1	62250001	62400000	1.91367
1	62325001	62475000	2.21025
1	62400001	62550000	2.40526
1	62475001	62625000	2.46996
1	62550001	62700000	2.21927
1	62625001	62775000	1.91398
1	62700001	62850000	2.12221
1	62775001	62925000	3.78599
1	62850001	63000000	4.33178
1	62925001	63075000	3.98328
1	63000001	63150000	3.76788
1	63075001	63225000	2.88397
1	63150001	63300000	2.54345
1	63225001	63375000	2.79103
1	63300001	63450000	2.9433
1	63375001	63525000	2.7649
1	63450001	63600000	3.1341
1	63525001	63675000	2.79393
1	63600001	63750000	3.14139
1	63675001	63825000	3.19249
1	63750001	63900000	2.70823
1	63825001	63975000	2.41381
1	63900001	64050000	2.24949
1	63975001	64125000	3.54868
1	64050001	64200000	2.17316
1	64125001	64275000	1.99333
1	64200001	64350000	2.54016
1	64275001	64425000	2.5616
1	64350001	64500000	2.35367
1	64425001	64575000	2.47939
1	64500001	64650000	2.46475
1	64575001	64725000	2.69305
1	64650001	64800000	6.43499
1	64725001	64875000	3.48622
1	64800001	64950000	2.48311
1	64875001	65025000	2.2275
1	64950001	65100000	2.19246
1	65025001	65175000	2.27373
1	65100001	65250000	2.22319
1	65175001	65325000	1.91387
1	65250001	65400000	1.99691
1	65325001	65475000	2.48971
1	65400001	65550000	2.50573
1	65475001	65625000	2.35592
1	65550001	65700000	2.59844
1	65625001	65775000	3.22031
1	65700001	65850000	3.30847
1	65775001	65925000	2.97426
1	65850001	66000000	3.05352
1	65925001	66075000	2.90716
1	66000001	66150000	2.27661
1	66075001	66225000	3.65509
1	66150001	66300000	3.38256
1	66225001	66375000	1.97271
1	66300001	66450000	2.37333
1	66375001	66525000	3.62791
1	66450001	66600000	3.03061
1	66525001	66675000	2.17458
1	66600001	66750000	2.13145
1	66675001	66825000	2.14022
1	66750001	66900000	2.60878
1	66825001	66975000	2.88724
1	66900001	67050000	3.13387
1	66975001	67125000	2.79787
1	67050001	67200000	2.31931
1	67125001	67275000	1.87719
1	67200001	67350000	1.79805
1	67275001	67425000	2.09461
1	67350001	67500000	2.18617
1	67425001	67575000	2.79827
1	67500001	67650000	3.17653
1	67575001	67725000	2.35841
1	67650001	67800000	2.13926
1	67725001	67875000	2.43112
1	67800001	67950000	2.80526
1	67875001	68025000	2.96395
1	67950001	68100000	2.54493
1	68025001	68175000	2.4014
1	68100001	68250000	3.99404
1	68175001	68325000	4.36209
1	68250001	68400000	3.19477
1	68325001	68475000	4.4409
1	68400001	68550000	5.18416
1	68475001	68625000	4.03111
1	68550001	68700000	4.1351
1	68625001	68775000	3.16055
1	68700001	68850000	3.11252
1	68775001	68925000	3.17571
1	68850001	69000000	2.33727
1	68925001	69075000	2.35862
1	69000001	69150000	2.2843
1	69075001	69225000	2.06397
1	69150001	69300000	2.10737
1	69225001	69375000	1.79972
1	69300001	69450000	2.42935
1	69375001	69525000	2.98418
1	69450001	69600000	4.03757
1	69525001	69675000	4.45759
1	69600001	69750000	2.58782
1	69675001	69825000	1.89108
1	69750001	69900000	2.20907
1	69825001	69975000	2.30516
1	69900001	70050000	2.16348
1	69975001	70125000	2.53884
1	70050001	70200000	3.49107
1	70125001	70275000	4.68236
1	70200001	70350000	6.48801
1	70275001	70425000	6.08611
1	70350001	70500000	2.25032
1	70425001	70575000	2.49049
1	70500001	70650000	2.60681
1	70575001	70725000	2.40146
1	70650001	70800000	2.36435
1	70725001	70875000	2.11167
1	70800001	70950000	2.26245
1	70875001	71025000	3.31285
1	70950001	71100000	3.36042
1	71025001	71175000	2.78132
1	71100001	71250000	2.27129
1	71175001	71325000	2.15388
1	71250001	71400000	2.33619
1	71325001	71475000	2.4221
1	71400001	71550000	2.73479
1	71475001	71625000	3.06552
1	71550001	71700000	3.19566
1	71625001	71775000	2.76062
1	71700001	71850000	2.94389
1	71775001	71925000	2.97679
1	71850001	72000000	3.38284
1	71925001	72075000	3.89191
1	72000001	72150000	2.62321
1	72075001	72225000	2.16461
1	72150001	72300000	2.11009
1	72225001	72375000	2.07601
1	72300001	72450000	2.23995
1	72375001	72525000	2.61252
1	72450001	72600000	2.61105
1	72525001	72675000	2.70953
1	72600001	72750000	4.30213
1	72675001	72825000	2.78269
1	72750001	72900000	2.59035
1	72825001	72975000	2.22283
1	72900001	73050000	1.99784
1	72975001	73125000	2.20894
1	73050001	73200000	2.39252
1	73125001	73275000	2.94063
1	73200001	73350000	4.32946
1	73275001	73425000	2.64869
1	73350001	73500000	2.19856
1	73425001	73575000	2.04546
1	73500001	73650000	2.51214
1	73575001	73725000	4.03494
1	73650001	73800000	3.72993
1	73725001	73875000	2.91415
1	73800001	73950000	2.8785
1	73875001	74025000	3.04613
1	73950001	74100000	3.76564
1	74025001	74175000	4.07649
1	74100001	74250000	3.3965
1	74175001	74325000	2.65054
1	74250001	74400000	2.40159
1	74325001	74475000	2.08393
1	74400001	74550000	2.18769
1	74475001	74625000	2.20209
1	74550001	74700000	2.79448
1	74625001	74775000	4.00567
1	74700001	74850000	5.90002
1	74775001	74925000	5.20974
1	74850001	75000000	3.92111
1	74925001	75075000	2.62823
1	75000001	75150000	1.99085
1	75075001	75225000	2.05839
1	75150001	75300000	2.251
1	75225001	75375000	2.13751
1	75300001	75450000	2.10853
1	75375001	75525000	2.53951
1	75450001	75600000	3.23766
1	75525001	75675000	3.42187
1	75600001	75750000	2.76044
1	75675001	75825000	2.66826
1	75750001	75900000	2.70794
1	75825001	75975000	2.93514
1	75900001	76050000	2.91615
1	75975001	76125000	2.89627
1	76050001	76200000	3.19387
1	76125001	76275000	3.25337
1	76200001	76350000	3.00968
1	76275001	76425000	2.79945
1	76350001	76500000	2.3828
1	76425001	76575000	1.90329
1	76500001	76650000	2.10173
1	76575001	76725000	2.51652
1	76650001	76800000	2.55366
1	76725001	76875000	2.99135
1	76800001	76950000	2.74179
1	76875001	77025000	2.02398
1	76950001	77100000	1.80104
1	77025001	77175000	2.17464
1	77100001	77250000	2.39355
1	77175001	77325000	2.26966
1	77250001	77400000	2.12814
1	77325001	77475000	2.32104
1	77400001	77550000	2.32699
1	77475001	77625000	2.32439
1	77550001	77700000	2.43143
1	77625001	77775000	2.10493
1	77700001	77850000	1.96663
1	77775001	77925000	2.08143
1	77850001	78000000	2.19112
1	77925001	78075000	2.1057
1	78000001	78150000	1.6065
1	78075001	78225000	1.79018
1	78150001	78300000	2.44477
1	78225001	78375000	2.3663
1	78300001	78450000	2.02313
1	78375001	78525000	1.98615
1	78450001	78600000	2.05012
1	78525001	78675000	2.32559
1	78600001	78750000	3.31781
1	78675001	78825000	3.56434
1	78750001	78900000	2.60216
1	78825001	78975000	2.38018
1	78900001	79050000	2.30705
1	78975001	79125000	6.2069
1	79050001	79200000	2.05389
1	79125001	79275000	2.0911
1	79200001	79350000	2.22585
1	79275001	79425000	2.54323
1	79350001	79500000	2.70819
1	79425001	79575000	2.32583
1	79500001	79650000	2.19891
1	79575001	79725000	2.5789
1	79650001	79800000	4.00217
1	79725001	79875000	4.70075
1	79800001	79950000	3.97977
1	79875001	80025000	2.73686
1	79950001	80100000	2.55641
1	80025001	80175000	2.65051
1	80100001	80250000	2.62699
1	80175001	80325000	2.24251
1	80250001	80400000	2.60611
1	80325001	80475000	2.45865
1	80400001	80550000	2.087
1	80475001	80625000	2.73693
1	80550001	80700000	4.04598
1	80625001	80775000	4.8563
1	80700001	80850000	3.18331
1	80775001	80925000	2.85777
1	80850001	81000000	2.48506
1	80925001	81075000	2.91257
1	81000001	81150000	3.20171
1	81075001	81225000	2.6481
1	81150001	81300000	2.72522
1	81225001	81375000	2.52896
1	81300001	81450000	2.83179
1	81375001	81525000	3.68566
1	81450001	81600000	3.05854
1	81525001	81675000	2.81927
1	81600001	81750000	2.9062
1	81675001	81825000	2.51876
1	81750001	81900000	2.14109
1	81825001	81975000	2.23474
1	81900001	82050000	2.58374
1	81975001	82125000	2.30752
1	82050001	82200000	2.16341
1	82125001	82275000	2.28197
1	82200001	82350000	2.64765
1	82275001	82425000	3.07453
1	82350001	82500000	3.37083
1	82425001	82575000	2.64444
1	82500001	82650000	2.14282
1	82575001	82725000	2.32377
1	82650001	82800000	2.74079
1	82725001	82875000	2.89719
1	82800001	82950000	3.07802
1	82875001	83025000	3.7325
1	82950001	83100000	3.41
1	83025001	83175000	3.17988
1	83100001	83250000	4.1079
1	83175001	83325000	2.92284
1	83250001	83400000	2.46535
1	83325001	83475000	2.50898
1	83400001	83550000	2.44611
1	83475001	83625000	2.58882
1	83550001	83700000	2.31692
1	83625001	83775000	2.27544
1	83700001	83850000	2.64485
1	83775001	83925000	2.68555
1	83850001	84000000	2.46537
1	83925001	84075000	2.54391
1	84000001	84150000	2.65068
1	84075001	84225000	2.38465
1	84150001	84300000	2.12713
1	84225001	84375000	2.31037
1	84300001	84450000	2.44314
1	84375001	84525000	2.18533
1	84450001	84600000	2.37342
1	84525001	84675000	4.14539
1	84600001	84750000	3.07017
1	84675001	84825000	2.46801
1	84750001	84900000	2.10374
1	84825001	84975000	1.93514
1	84900001	85050000	2.15089
1	84975001	85125000	2.36914
1	85050001	85200000	3.07664
1	85125001	85275000	3.56168
1	85200001	85350000	3.44511
1	85275001	85425000	3.40396
1	85350001	85500000	2.58517
1	85425001	85575000	2.08955
1	85500001	85650000	2.11108
1	85575001	85725000	2.07424
1	85650001	85800000	1.94192
1	85725001	85875000	2.2088
1	85800001	85950000	2.82733
1	85875001	86025000	2.80993
1	85950001	86100000	2.61982
1	86025001	86175000	2.54137
1	86100001	86250000	2.72906
1	86175001	86325000	2.77655
1	86250001	86400000	2.52746
1	86325001	86475000	2.81273
1	86400001	86550000	2.54959
1	86475001	86625000	2.0396
1	86550001	86700000	2.01807
1	86625001	86775000	1.95251
1	86700001	86850000	2.08804
1	86775001	86925000	2.14885
1	86850001	87000000	2.22454
1	86925001	87075000	2.72279
1	87000001	87150000	3.23752
1	87075001	87225000	3.45766
1	87150001	87300000	4.23202
1	87225001	87375000	5.4572
1	87300001	87450000	6.19745
1	87375001	87525000	5.09291
1	87450001	87600000	3.6331
1	87525001	87675000	3.08751
1	87600001	87750000	2.61896
1	87675001	87825000	2.33929
1	87750001	87900000	3.11496
1	87825001	87975000	3.49955
1	87900001	88050000	2.45568
1	87975001	88125000	2.38946
1	88050001	88200000	2.36126
1	88125001	88275000	2.32139
1	88200001	88350000	2.64024
1	88275001	88425000	2.46997
1	88350001	88500000	2.47837
1	88425001	88575000	3.57715
1	88500001	88650000	3.1458
1	88575001	88725000	2.55444
1	88650001	88800000	3.02156
1	88725001	88875000	2.76382
1	88800001	88950000	2.29206
1	88875001	89025000	2.35002
1	88950001	89100000	2.44119
1	89025001	89175000	2.77236
1	89100001	89250000	3.03169
1	89175001	89325000	2.73186
1	89250001	89400000	2.56466
1	89325001	89475000	2.40371
1	89400001	89550000	2.31791
1	89475001	89625000	2.23845
1	89550001	89700000	2.27497
1	89625001	89775000	2.5639
1	89700001	89850000	2.3177
1	89775001	89925000	2.13649
1	89850001	90000000	2.04458
1	89925001	90075000	2.30289
1	90000001	90150000	2.45136
1	90075001	90225000	2.57259
1	90150001	90300000	4.57672
1	90225001	90375000	7.31775
1	90300001	90450000	4.67628
1	90375001	90525000	3.19795
1	90450001	90600000	2.9434
1	90525001	90675000	2.60272
1	90600001	90750000	2.73377
1	90675001	90825000	2.32523
1	90750001	90900000	2.08128
1	90825001	90975000	1.87192
1	90900001	91050000	1.95649
1	90975001	91125000	2.16898
1	91050001	91200000	1.93881
1	91125001	91275000	1.48382
1	91200001	91350000	1.95915
1	91275001	91425000	2.71489
1	91350001	91500000	2.27042
1	91425001	91575000	2.54623
1	91500001	91650000	2.75006
1	91575001	91725000	2.19342
1	91650001	91800000	2.50451
1	91725001	91875000	3.94939
1	91800001	91950000	3.02582
1	91875001	92025000	2.02267
1	91950001	92100000	1.8379
1	92025001	92175000	2.08452
1	92100001	92250000	2.03542
1	92175001	92325000	2.05613
1	92250001	92400000	2.32829
1	92325001	92475000	2.37867
1	92400001	92550000	2.1597
1	92475001	92625000	2.18814
1	92550001	92700000	2.41899
1	92625001	92775000	2.6201
1	92700001	92850000	2.51263
1	92775001	92925000	2.46047
1	92850001	93000000	2.71431
1	92925001	93075000	3.28496
1	93000001	93150000	3.12513
1	93075001	93225000	2.38634
1	93150001	93300000	2.13282
1	93225001	93375000	2.27194
1	93300001	93450000	2.66958
1	93375001	93525000	3.36165
1	93450001	93600000	3.49384
1	93525001	93675000	2.1926
1	93600001	93750000	2.10436
1	93675001	93825000	2.43316
1	93750001	93900000	2.71959
1	93825001	93975000	2.07459
1	93900001	94050000	1.86539
1	93975001	94125000	2.27376
1	94050001	94200000	2.93606
1	94125001	94275000	2.91848
1	94200001	94350000	3.01679
1	94275001	94425000	3.75589
1	94350001	94500000	3.74271
1	94425001	94575000	3.47618
1	94500001	94650000	3.17036
1	94575001	94725000	2.93655
1	94650001	94800000	3.62776
1	94725001	94875000	3.96681
1	94800001	94950000	4.43622
1	94875001	95025000	4.2006
1	94950001	95100000	3.28704
1	95025001	95175000	3.47906
1	95100001	95250000	3.40678
1	95175001	95325000	3.1515
1	95250001	95400000	3.61511
1	95325001	95475000	3.52001
1	95400001	95550000	3.21203
1	95475001	95625000	2.93716
1	95550001	95700000	3.10946
1	95625001	95775000	2.85173
1	95700001	95850000	2.71124
1	95775001	95925000	3.09681
1	95850001	96000000	2.26569
1	95925001	96075000	2.26002
1	96000001	96150000	3.20857
1	96075001	96225000	3.4483
1	96150001	96300000	2.64122
1	96225001	96375000	2.86362
1	96300001	96450000	3.13979
1	96375001	96525000	2.89368
1	96450001	96600000	3.091
1	96525001	96675000	3.25225
1	96600001	96750000	3.05166
1	96675001	96825000	3.35912
1	96750001	96900000	6.26822
1	96825001	96975000	5.93149
1	96900001	97050000	3.16537
1	96975001	97125000	2.65874
1	97050001	97200000	3.17214
1	97125001	97275000	2.87331
1	97200001	97350000	2.68877
1	97275001	97425000	3.1479
1	97350001	97500000	2.87248
1	97425001	97575000	2.29667
1	97500001	97650000	2.80189
1	97575001	97725000	3.10371
1	97650001	97800000	3.2719
1	97725001	97875000	3.8032
1	97800001	97950000	3.18662
1	97875001	98025000	3.04239
1	97950001	98100000	2.68863
1	98025001	98175000	2.32961
1	98100001	98250000	2.61758
1	98175001	98325000	2.56472
1	98250001	98400000	2.32062
1	98325001	98475000	2.32384
1	98400001	98550000	2.25846
1	98475001	98625000	2.39419
1	98550001	98700000	2.91839
1	98625001	98775000	2.75283
1	98700001	98850000	3.43781
1	98775001	98925000	3.75882
1	98850001	99000000	2.79412
1	98925001	99075000	3.19495
1	99000001	99150000	2.65246
1	99075001	99225000	2.29152
1	99150001	99300000	2.486
1	99225001	99375000	2.45521
1	99300001	99450000	2.21984
1	99375001	99525000	2.40958
1	99450001	99600000	2.84674
1	99525001	99675000	3.03616
1	99600001	99750000	3.0288
1	99675001	99825000	4.35413
1	99750001	99900000	6.55081
1	99825001	99975000	4.52492
1	99900001	100050000	2.88147
1	99975001	100125000	3.31144
1	100050001	100200000	4.27361
1	100125001	100275000	2.99464
1	100200001	100350000	2.734
1	100275001	100425000	2.66966
1	100350001	100500000	2.38298
1	100425001	100575000	2.8839
1	100500001	100650000	3.79217
1	100575001	100725000	4.27755
1	100650001	100800000	2.58436
1	100725001	100875000	2.41742
1	100800001	100950000	2.58256
1	100875001	101025000	2.64437
1	100950001	101100000	2.5091
1	101025001	101175000	2.24833
1	101100001	101250000	2.3182
1	101175001	101325000	2.72688
1	101250001	101400000	2.67295
1	101325001	101475000	2.82803
1	101400001	101550000	3.01883
1	101475001	101625000	3.36401
1	101550001	101700000	2.89559
1	101625001	101775000	2.5345
1	101700001	101850000	2.91846
1	101775001	101925000	5.52501
1	101850001	102000000	6.03765
1	101925001	102075000	2.81701
1	102000001	102150000	2.37248
1	102075001	102225000	2.38995
1	102150001	102300000	2.4058
1	102225001	102375000	3.24511
1	102300001	102450000	3.56291
1	102375001	102525000	2.5295
1	102450001	102600000	2.51841
1	102525001	102675000	2.51476
1	102600001	102750000	2.28037
1	102675001	102825000	2.13899
1	102750001	102900000	3.03634
1	102825001	102975000	4.55032
1	102900001	103050000	3.71927
1	102975001	103125000	3.07762
1	103050001	103200000	3.09803
1	103125001	103275000	3.32815
1	103200001	103350000	4.22996
1	103275001	103425000	4.5192
1	103350001	103500000	3.49278
1	103425001	103575000	3.51929
1	103500001	103650000	4.28056
1	103575001	103725000	4.38829
1	103650001	103800000	4.35856
1	103725001	103875000	3.19972
1	103800001	103950000	2.24531
1	103875001	104025000	2.09221
1	103950001	104100000	2.08898
1	104025001	104175000	2.28003
1	104100001	104250000	3.06946
1	104175001	104325000	2.28451
1	104250001	104400000	2.06396
1	104325001	104475000	2.66971
1	104400001	104550000	2.52992
1	104475001	104625000	2.01308
1	104550001	104700000	2.44977
1	104625001	104775000	2.59987
1	104700001	104850000	1.99369
1	104775001	104925000	1.76117
1	104850001	105000000	2.12481
1	104925001	105075000	2.34734
1	105000001	105150000	2.23767
1	105075001	105225000	3.235
1	105150001	105300000	2.96982
1	105225001	105375000	2.45567
1	105300001	105450000	2.63722
1	105375001	105525000	3.26521
1	105450001	105600000	2.79326
1	105525001	105675000	2.85621
1	105600001	105750000	3.00103
1	105675001	105825000	2.67589
1	105750001	105900000	2.3839
1	105825001	105975000	2.38401
1	105900001	106050000	2.58232
1	105975001	106125000	2.48272
1	106050001	106200000	2.11229
1	106125001	106275000	1.79325
1	106200001	106350000	2.09789
1	106275001	106425000	2.28051
1	106350001	106500000	2.71153
1	106425001	106575000	3.08014
1	106500001	106650000	3.54089
1	106575001	106725000	3.99427
1	106650001	106800000	2.8456
1	106725001	106875000	2.30864
1	106800001	106950000	2.09502
1	106875001	107025000	2.1891
1	106950001	107100000	2.18457
1	107025001	107175000	1.97565
1	107100001	107250000	1.75105
1	107175001	107325000	2.12792
1	107250001	107400000	3.14337
1	107325001	107475000	3.11699
1	107400001	107550000	3.76492
1	107475001	107625000	5.19938
1	107550001	107700000	4.61042
1	107625001	107775000	4.61202
1	107700001	107850000	4.74014
1	107775001	107925000	4.0587
1	107850001	108000000	3.29711
1	107925001	108075000	2.64081
1	108000001	108150000	2.64924
1	108075001	108225000	3.8143
1	108150001	108300000	3.80918
1	108225001	108375000	3.4096
1	108300001	108450000	3.58877
1	108375001	108525000	4.07729
1	108450001	108600000	3.0678
1	108525001	108675000	3.00671
1	108600001	108750000	3.37496
1	108675001	108825000	2.53274
1	108750001	108900000	2.33917
1	108825001	108975000	2.56121
1	108900001	109050000	2.98904
1	108975001	109125000	2.66913
1	109050001	109200000	2.15216
1	109125001	109275000	3.42559
1	109200001	109350000	6.13545
1	109275001	109425000	4.83389
1	109350001	109500000	5.02403
1	109425001	109575000	3.2572
1	109500001	109650000	3.27969
1	109575001	109725000	2.71588
1	109650001	109800000	2.46597
1	109725001	109875000	3.32659
1	109800001	109950000	3.5924
1	109875001	110025000	2.84461
1	109950001	110100000	2.6225
1	110025001	110175000	5.07717
1	110100001	110250000	2.97786
1	110175001	110325000	2.04145
1	110250001	110400000	2.30236
1	110325001	110475000	2.31697
1	110400001	110550000	3.27784
1	110475001	110625000	4.65159
1	110550001	110700000	4.11316
1	110625001	110775000	2.72211
1	110700001	110850000	3.35871
1	110775001	110925000	2.70494
1	110850001	111000000	2.81148
1	110925001	111075000	4.8707
1	111000001	111150000	4.93537
1	111075001	111225000	4.77458
1	111150001	111300000	2.91997
1	111225001	111375000	2.35672
1	111300001	111450000	2.58422
1	111375001	111525000	2.5388
1	111450001	111600000	2.4746
1	111525001	111675000	2.65884
1	111600001	111750000	2.44084
1	111675001	111825000	2.45441
1	111750001	111900000	3.06021
1	111825001	111975000	3.66905
1	111900001	112050000	3.74864
1	111975001	112125000	2.95218
1	112050001	112200000	2.0434
1	112125001	112275000	1.93734
1	112200001	112350000	2.09847
1	112275001	112425000	2.20925
1	112350001	112500000	2.1098
1	112425001	112575000	2.01713
1	112500001	112650000	2.0236
1	112575001	112725000	3.53902
1	112650001	112800000	3.89724
1	112725001	112875000	2.51516
1	112800001	112950000	2.11638
1	112875001	113025000	2.13774
1	112950001	113100000	2.98056
1	113025001	113175000	4.14342
1	113100001	113250000	6.2197
1	113175001	113325000	11.1339
1	113250001	113400000	7.29609
1	113325001	113475000	4.73843
1	113400001	113550000	6.49861
1	113475001	113625000	4.99452
1	113550001	113700000	3.56209
1	113625001	113775000	2.67169
1	113700001	113850000	2.34052
1	113775001	113925000	2.60965
1	113850001	114000000	3.87584
1	113925001	114075000	4.23934
1	114000001	114150000	3.02058
1	114075001	114225000	2.98789
1	114150001	114300000	3.21454
1	114225001	114375000	2.82838
1	114300001	114450000	2.53262
1	114375001	114525000	2.55871
1	114450001	114600000	2.48334
1	114525001	114675000	2.30014
1	114600001	114750000	1.95855
1	114675001	114825000	2.35213
1	114750001	114900000	3.48539
1	114825001	114975000	2.75057
1	114900001	115050000	2.80297
1	114975001	115125000	4.99933
1	115050001	115200000	7.17457
1	115125001	115275000	4.44268
1	115200001	115350000	3.12885
1	115275001	115425000	2.25501
1	115350001	115500000	2.09773
1	115425001	115575000	6.25363
1	115500001	115650000	7.25521
1	115575001	115725000	6.24628
1	115650001	115800000	4.43616
1	115725001	115875000	2.838
1	115800001	115950000	2.67634
1	115875001	116025000	4.73998
1	115950001	116100000	3.63764
1	116025001	116175000	2.33681
1	116100001	116250000	3.4417
1	116175001	116325000	8.22036
1	116250001	116400000	2.50563
1	116325001	116475000	3.05698
1	116400001	116550000	3.21176
1	116475001	116625000	2.53885
1	116550001	116700000	2.76726
1	116625001	116775000	3.23989
1	116700001	116850000	3.31082
1	116775001	116925000	3.32054
1	116850001	117000000	2.42853
1	116925001	117075000	2.40504
1	117000001	117150000	3.3515
1	117075001	117225000	2.96684
1	117150001	117300000	2.38583
1	117225001	117375000	5.18318
1	117300001	117450000	6.80331
1	117375001	117525000	2.26339
1	117450001	117600000	2.34954
1	117525001	117675000	2.37641
1	117600001	117750000	2.14702
1	117675001	117825000	1.88126
1	117750001	117900000	2.23111
1	117825001	117975000	2.52195
1	117900001	118050000	2.46819
1	117975001	118125000	2.28777
1	118050001	118200000	1.7125
1	118125001	118275000	1.95877
1	118200001	118350000	2.36562
1	118275001	118425000	2.80203
1	118350001	118500000	2.71957
1	118425001	118575000	4.09224
1	118500001	118650000	4.19803
1	118575001	118725000	3.5862
1	118650001	118800000	4.26406
1	118725001	118875000	5.26464
1	118800001	118950000	5.70883
1	118875001	119025000	5.34901
1	118950001	119100000	7.21123
1	119025001	119175000	3.37081
1	119100001	119250000	1.75658
1	119175001	119325000	1.18536
1	119250001	119400000	8.45698
1	119325001	119475000	2.27466
1	119400001	119550000	2.27806
1	119475001	119625000	2.65859
1	119550001	119700000	4.41133
1	119625001	119775000	3.12388
1	119700001	119850000	2.43067
1	119775001	119925000	2.62577
1	119850001	120000000	2.79069
1	119925001	120075000	2.32322
1	120000001	120150000	2.36503
1	120075001	120225000	2.62096
1	120150001	120300000	3.83272
1	120225001	120375000	5.79827
1	120300001	120450000	5.12444
1	120375001	120525000	4.79295
1	120450001	120600000	6.70314
1	120525001	120675000	6.53118
1	120600001	120750000	5.40765
1	120675001	120825000	4.72899
1	120750001	120900000	4.90727
1	120825001	120975000	4.94972
1	120900001	121050000	5.29673
1	120975001	121125000	5.21785
1	121050001	121200000	4.18421
1	121125001	121275000	4.47736
1	121200001	121350000	5.10846
1	121275001	121425000	4.01455
1	121350001	121500000	3.04493
1	121425001	121575000	2.92321
1	121500001	121650000	2.69403
1	121575001	121725000	4.09304
1	121650001	121800000	5.46487
1	121725001	121875000	3.66188
1	121800001	121950000	3.11054
1	121875001	122025000	2.57295
1	121950001	122100000	1.91356
1	122025001	122175000	1.83744
1	122100001	122250000	2.19196
1	122175001	122325000	4.69099
1	122250001	122400000	3.15245
1	122325001	122475000	2.10834
1	122400001	122550000	2.38351
1	122475001	122625000	2.61615
1	122550001	122700000	3.20398
1	122625001	122775000	3.774
1	122700001	122850000	3.80282
1	122775001	122925000	3.99661
1	122850001	123000000	3.15732
1	122925001	123075000	2.6535
1	123000001	123150000	2.46442
1	123075001	123225000	2.73423
1	123150001	123300000	2.653
1	123225001	123375000	2.86438
1	123300001	123450000	3.32917
1	123375001	123525000	2.51169
1	123450001	123600000	2.25942
1	123525001	123675000	2.83587
1	123600001	123750000	3.44029
1	123675001	123825000	2.56566
1	123750001	123900000	2.82563
1	123825001	123975000	3.30915
1	123900001	124050000	2.68304
1	123975001	124125000	3.2686
1	124050001	124200000	4.43374
1	124125001	124275000	4.78373
1	124200001	124350000	4.53962
1	124275001	124425000	6.85355
1	124350001	124500000	5.20441
1	124425001	124575000	5.69757
1	124500001	124650000	7.87648
1	124575001	124725000	6.08673
1	124650001	124800000	4.1882
1	124725001	124875000	4.31833
1	124800001	124950000	4.82994
1	124875001	125025000	5.02717
1	124950001	125100000	6.08428
1	125025001	125175000	5.92524
1	125100001	125250000	5.68414
1	125175001	125325000	4.61488
1	125250001	125400000	3.70885
1	125325001	125475000	3.29523
1	125400001	125550000	3.0651
1	125475001	125625000	5.75049
1	125550001	125700000	9.31281
1	125625001	125775000	9.78655
1	125700001	125850000	24.0314
1	125775001	125925000	14.4518
1	125850001	126000000	4.67579
1	125925001	126075000	3.72526
1	126000001	126150000	39.2718
1	126075001	126225000	32.2546
1	126150001	126300000	6.61862
1	126225001	126375000	4.27344
1	126300001	126450000	4.37876
1	126375001	126525000	6.44684
1	126450001	126600000	6.18311
1	126525001	126675000	3.32255
1	126600001	126750000	6.89368
1	126675001	126825000	12.1656
1	126750001	126900000	10.2933
1	126825001	126975000	7.53353
1	126900001	127050000	5.36148
1	126975001	127125000	5.5991
1	127050001	127200000	8.49489
1	127125001	127275000	5.72092
1	127200001	127350000	2.16357
1	127275001	127425000	2.11849
1	127350001	127500000	3.01888
1	127425001	127575000	3.03858
1	127500001	127650000	2.80768
1	127575001	127725000	4.04648
1	127650001	127800000	3.94329
1	127725001	127875000	3.69531
1	127800001	127950000	4.22095
1	127875001	128025000	4.72451
1	127950001	128100000	5.33536
1	128025001	128175000	7.52655
1	128100001	128250000	9.02599
1	128175001	128325000	12.8342
1	128250001	128400000	8.1621
1	128325001	128475000	4.27157
1	128400001	128550000	3.84831
1	128475001	128625000	2.26173
1	128550001	128700000	1.17013
1	128625001	128775000	1.4554
1	128700001	128850000	3.76353
1	128775001	128925000	5.6249
1	128850001	129000000	4.46187
1	128925001	129075000	2.8821
1	129000001	129150000	2.21507
1	129075001	129225000	2.04652
1	129150001	129300000	3.60818
1	129225001	129375000	2.31639
1	129300001	129450000	2.17471
1	129375001	129525000	3.77092
1	129450001	129600000	8.37738
1	129525001	129675000	9.23858
1	129600001	129750000	7.85565
1	129675001	129825000	4.40228
1	129750001	129900000	2.56195
1	129825001	129975000	2.68886
1	129900001	130050000	2.81855
1	129975001	130125000	2.65956
1	130050001	130200000	2.72473
1	130125001	130275000	4.39888
1	130200001	130350000	4.92642
1	130275001	130425000	3.90751
1	130350001	130500000	2.83821
1	130425001	130575000	2.96412
1	130500001	130650000	3.32249
1	130575001	130725000	2.4272
1	130650001	130800000	1.87469
1	130725001	130875000	1.78577
1	130800001	130950000	1.89836
1	130875001	131025000	2.44007
1	130950001	131100000	2.53302
1	131025001	131175000	2.52184
1	131100001	131250000	2.71901
1	131175001	131325000	3.70292
1	131250001	131400000	2.54712
1	131325001	131475000	2.46056
1	131400001	131550000	2.93616
1	131475001	131625000	3.04638
1	131550001	131700000	2.26216
1	131625001	131775000	1.91098
1	131700001	131850000	1.78203
1	131775001	131925000	1.95159
1	131850001	132000000	2.08543
1	131925001	132075000	2.57715
1	132000001	132150000	3.25652
1	132075001	132225000	2.43326
1	132150001	132300000	2.26694
1	132225001	132375000	2.73352
1	132300001	132450000	2.64928
1	132375001	132525000	2.44413
1	132450001	132600000	2.3973
1	132525001	132675000	2.29365
1	132600001	132750000	2.76489
1	132675001	132825000	3.72155
1	132750001	132900000	3.32412
1	132825001	132975000	3.14899
1	132900001	133050000	3.87516
1	132975001	133125000	4.74179
1	133050001	133200000	6.30638
1	133125001	133275000	4.85758
1	133200001	133350000	4.89391
1	133275001	133425000	5.75556
1	133350001	133500000	5.30208
1	133425001	133575000	3.06124
1	133500001	133650000	2.47109
1	133575001	133725000	2.92573
1	133650001	133800000	2.41218
1	133725001	133875000	2.42751
1	133800001	133950000	3.3967
1	133875001	134025000	2.20266
1	133950001	134100000	2.58024
1	134025001	134175000	2.9144
1	134100001	134250000	2.12969
1	134175001	134325000	1.95594
1	134250001	134400000	2.21628
1	134325001	134475000	2.6109
1	134400001	134550000	2.97317
1	134475001	134625000	3.73324
1	134550001	134700000	3.30712
1	134625001	134775000	2.34382
1	134700001	134850000	2.52996
1	134775001	134925000	2.8343
1	134850001	135000000	2.6644
1	134925001	135075000	2.11104
1	135000001	135150000	2.27416
1	135075001	135225000	2.82293
1	135150001	135300000	2.61277
1	135225001	135375000	3.24932
1	135300001	135450000	2.34942
1	135375001	135525000	1.61435
1	135450001	135600000	2.07818
1	135525001	135675000	2.58359
1	135600001	135750000	2.58984
1	135675001	135825000	2.41121
1	135750001	135900000	2.52481
1	135825001	135975000	2.34038
1	135900001	136050000	2.19517
1	135975001	136125000	2.56237
1	136050001	136200000	2.50633
1	136125001	136275000	2.4774
1	136200001	136350000	1.99681
1	136275001	136425000	2.06378
1	136350001	136500000	2.38309
1	136425001	136575000	1.85068
1	136500001	136650000	2.0885
1	136575001	136725000	2.70519
1	136650001	136800000	5.85838
1	136725001	136875000	3.24612
1	136800001	136950000	4.42911
1	136875001	137025000	4.57141
1	136950001	137100000	3.11948
1	137025001	137175000	3.09868
1	137100001	137250000	2.81168
1	137175001	137325000	3.03738
1	137250001	137400000	4.28038
1	137325001	137475000	4.73024
1	137400001	137550000	3.43803
1	137475001	137625000	3.00063
1	137550001	137700000	2.44377
1	137625001	137775000	4.69634
1	137700001	137850000	10.6824
1	137775001	137925000	9.36098
1	137850001	138000000	3.90165
1	137925001	138075000	2.36462
1	138000001	138150000	2.32531
1	138075001	138225000	2.61588
1	138150001	138300000	3.01005
1	138225001	138375000	2.76984
1	138300001	138450000	2.65289
1	138375001	138525000	2.52045
1	138450001	138600000	2.28014
1	138525001	138675000	3.03156
1	138600001	138750000	2.23346
1	138675001	138825000	2.26994
1	138750001	138900000	2.4557
1	138825001	138975000	2.52171
1	138900001	139050000	2.89391
1	138975001	139125000	2.66596
1	139050001	139200000	2.30688
1	139125001	139275000	2.54752
1	139200001	139350000	2.81576
1	139275001	139425000	3.0773
1	139350001	139500000	4.33823
1	139425001	139575000	5.75354
1	139500001	139650000	4.31975
1	139575001	139725000	3.27253
1	139650001	139800000	3.08381
1	139725001	139875000	2.97734
1	139800001	139950000	2.60608
1	139875001	140025000	2.39072
1	139950001	140100000	2.52555
1	140025001	140175000	2.76171
1	140100001	140250000	2.87529
1	140175001	140325000	7.48257
1	140250001	140400000	2.86886
1	140325001	140475000	3.13943
1	140400001	140550000	3.75134
1	140475001	140625000	3.79939
1	140550001	140700000	3.53494
1	140625001	140775000	3.11685
1	140700001	140850000	3.18346
1	140775001	140925000	2.93282
1	140850001	141000000	2.44102
1	140925001	141075000	2.4253
1	141000001	141150000	2.3118
1	141075001	141225000	2.65009
1	141150001	141300000	3.30261
1	141225001	141375000	3.57961
1	141300001	141450000	3.16313
1	141375001	141525000	3.22106
1	141450001	141600000	3.15101
1	141525001	141675000	2.75743
1	141600001	141750000	3.41784
1	141675001	141825000	5.16936
1	141750001	141900000	5.46798
1	141825001	141975000	7.5314
1	141900001	142050000	3.50653
1	141975001	142125000	2.1839
1	142050001	142200000	2.42709
1	142125001	142275000	3.07495
1	142200001	142350000	2.67442
1	142275001	142425000	2.47727
1	142350001	142500000	2.41373
1	142425001	142575000	2.61672
1	142500001	142650000	3.3965
1	142575001	142725000	4.24837
1	142650001	142800000	3.78429
1	142725001	142875000	2.60588
1	142800001	142950000	2.92284
1	142875001	143025000	2.46204
1	142950001	143100000	2.39089
1	143025001	143175000	2.7451
1	143100001	143250000	5.74298
1	143175001	143325000	4.50463
1	143250001	143400000	4.39658
1	143325001	143475000	5.3048
1	143400001	143550000	2.7802
1	143475001	143625000	3.56581
1	143550001	143700000	4.47796
1	143625001	143775000	3.45349
1	143700001	143850000	2.77316
1	143775001	143925000	2.38072
1	143850001	144000000	2.52605
1	143925001	144075000	2.39495
1	144000001	144150000	2.29987
1	144075001	144225000	2.27668
1	144150001	144300000	2.29546
1	144225001	144375000	4.70092
1	144300001	144450000	6.6319
1	144375001	144525000	3.28917
1	144450001	144600000	2.81544
1	144525001	144675000	2.07754
1	144600001	144750000	2.34774
1	144675001	144825000	4.01072
1	144750001	144900000	3.34574
1	144825001	144975000	2.79716
1	144900001	145050000	3.06939
1	144975001	145125000	3.06587
1	145050001	145200000	3.78313
1	145125001	145275000	3.51373
1	145200001	145350000	3.97704
1	145275001	145425000	3.2365
1	145350001	145500000	2.14702
1	145425001	145575000	2.77286
1	145500001	145650000	2.86612
1	145575001	145725000	2.67682
1	145650001	145800000	2.2729
1	145725001	145875000	1.95388
1	145800001	145950000	2.19925
1	145875001	146025000	2.53843
1	145950001	146100000	2.65609
1	146025001	146175000	2.88798
1	146100001	146250000	3.24863
1	146175001	146325000	3.44814
1	146250001	146400000	3.15246
1	146325001	146475000	3.07093
1	146400001	146550000	3.24469
1	146475001	146625000	4.08002
1	146550001	146700000	3.53469
1	146625001	146775000	3.14723
1	146700001	146850000	2.80295
1	146775001	146925000	2.35499
1	146850001	147000000	2.84068
1	146925001	147075000	3.37584
1	147000001	147150000	2.6866
1	147075001	147225000	2.6712
1	147150001	147300000	3.05305
1	147225001	147375000	2.91266
1	147300001	147450000	2.02675
1	147375001	147525000	2.14912
1	147450001	147600000	2.81669
1	147525001	147675000	2.55033
1	147600001	147750000	3.29097
1	147675001	147825000	3.02642
1	147750001	147900000	3.005
1	147825001	147975000	2.61801
1	147900001	148050000	2.52422
1	147975001	148125000	2.52547
1	148050001	148200000	2.52569
1	148125001	148275000	2.50326
1	148200001	148350000	2.45887
1	148275001	148425000	2.09996
1	148350001	148500000	2.4557
1	148425001	148575000	3.74315
1	148500001	148650000	3.05782
1	148575001	148725000	2.70109
1	148650001	148800000	2.81309
1	148725001	148875000	2.72518
1	148800001	148950000	2.60377
1	148875001	149025000	2.253
1	148950001	149100000	2.11369
1	149025001	149175000	2.07771
1	149100001	149250000	2.47868
1	149175001	149325000	2.68361
1	149250001	149400000	2.21555
1	149325001	149475000	2.12347
1	149400001	149550000	2.31693
1	149475001	149625000	2.90911
1	149550001	149700000	2.32817
1	149625001	149775000	2.2822
1	149700001	149850000	2.33726
1	149775001	149925000	2.19652
[truncated: 35,468 more rows]

## Sheet: Table S10
Table S10.122 Windows shared by FST and θπ ratio
CHROM	BIN_START	BIN_END	MEAN_FST	log2(PI(WILD/EF))
1	55275001	55425000	0.40974	4.00762
1	277725001	277875000	0.407399	3.75316
1	277800001	277950000	0.505681	4.10122
1	277875001	278025000	0.488949	3.66218
2	76950001	77100000	0.513033	5.43571
2	77025001	77175000	0.493679	4.76286
2	79725001	79875000	0.448023	4.07883
2	79800001	79950000	0.40789	3.55809
2	125775001	125925000	0.610031	4.65846
2	126375001	126525000	0.464567	3.53778
2	126450001	126600000	0.415644	3.85349
2	128625001	128775000	0.434559	3.87157
2	133725001	133875000	0.447392	4.04751
2	133800001	133950000	0.428847	5.67664
2	150075001	150225000	0.424272	3.79446
2	198600001	198750000	0.573656	4.02339
2	198675001	198825000	0.517684	4.03221
2	199425001	199575000	0.46137	4.97177
2	234375001	234525000	0.404704	3.67494
2	264750001	264900000	0.409008	3.45141
3	18900001	19050000	0.446924	5.55441
3	100950001	101100000	0.516464	5.13151
3	134325001	134475000	0.428183	7.9687
3	134400001	134550000	0.409983	3.98257
3	210150001	210300000	0.42642	3.76313
4	69825001	69975000	0.44313	3.73251
4	69900001	70050000	0.475718	4.55887
5	116700001	116850000	0.538691	6.61398
5	116775001	116925000	0.573765	6.27625
5	116850001	117000000	0.512807	6.87801
5	116925001	117075000	0.415714	5.85217
5	117000001	117150000	0.443358	5.46529
5	117075001	117225000	0.483961	4.18315
6	90150001	90300000	0.523818	3.7207
8	58500001	58650000	0.43043	3.96964
8	72000001	72150000	0.455654	3.77058
8	88275001	88425000	0.464738	3.61446
8	97500001	97650000	0.488697	4.39542
8	97575001	97725000	0.415801	4.21142
10	8775001	8925000	0.439425	5.78972
10	9075001	9225000	0.409603	6.15079
10	9150001	9300000	0.411839	4.50488
10	30900001	31050000	0.457971	3.95947
10	78375001	78525000	0.544465	3.95524
10	84900001	85050000	0.408619	3.58239
13	44850001	45000000	0.474885	3.67944
13	51450001	51600000	0.466835	4.61486
13	51525001	51675000	0.524088	4.12231
13	53025001	53175000	0.507794	4.79544
13	53100001	53250000	0.502075	3.74142
13	53175001	53325000	0.476659	3.59405
13	53250001	53400000	0.53572	5.01797
13	64575001	64725000	0.429529	4.39118
13	64650001	64800000	0.43073	4.74962
13	64875001	65025000	0.414264	3.62805
13	66000001	66150000	0.454577	3.49066
13	66075001	66225000	0.524922	3.54122
13	67050001	67200000	0.461186	4.44292
13	67125001	67275000	0.408564	4.56561
15	525001	675000	0.498208	3.80262
15	825001	975000	0.457363	3.79985
15	900001	1050000	0.448749	4.11324
15	975001	1125000	0.440588	4.33127
15	1050001	1200000	0.422392	5.09155
15	1125001	1275000	0.405676	3.63048
15	1350001	1500000	0.405027	3.55905
15	23100001	23250000	0.433662	3.54818
17	7350001	7500000	0.404715	3.67242
18	31125001	31275000	0.505909	4.51563
18	31200001	31350000	0.459016	4.90521
18	45150001	45300000	0.475172	4.40169
18	45225001	45375000	0.453991	4.05217
18	67800001	67950000	0.522863	4.1889
18	67875001	68025000	0.531056	6.17045
18	67950001	68100000	0.430997	3.81854
19	62250001	62400000	0.409634	3.54347
20	16800001	16950000	0.472607	5.64244
20	16875001	17025000	0.490336	3.77886
21	52575001	52725000	0.410748	5.38963
21	52650001	52800000	0.419518	6.04334
23	8325001	8475000	0.417326	3.54086
24	35400001	35550000	0.568058	4.35641
24	35475001	35625000	0.467861	4.37034
25	6975001	7125000	0.435477	4.66287
25	7050001	7200000	0.404896	3.55148
27	24375001	24525000	0.43537	4.849
27	44850001	45000000	0.47231	3.97813
27	44925001	45075000	0.432097	5.51653
27	45000001	45150000	0.426745	5.73896
27	45075001	45225000	0.450983	4.11157
27	52875001	53025000	0.406064	3.66041
27	55050001	55200000	0.444233	4.14779
27	55125001	55275000	0.442609	4.28418
27	55200001	55350000	0.413807	4.06729
27	55350001	55500000	0.442756	4.43848
27	55425001	55575000	0.436806	4.3106
27	62250001	62400000	0.415245	3.4669
27	62325001	62475000	0.418039	3.56531
27	70950001	71100000	0.404539	3.46323
27	71100001	71250000	0.462568	3.61145
27	71175001	71325000	0.469559	3.85385
27	72675001	72825000	0.416211	4.41355
27	73575001	73725000	0.438302	3.72109
27	74400001	74550000	0.476058	3.4944
27	74475001	74625000	0.431024	3.81136
27	74550001	74700000	0.407224	5.54896
27	74775001	74925000	0.403765	4.12732
27	75150001	75300000	0.476908	5.3905
27	78825001	78975000	0.431079	4.90749
27	78900001	79050000	0.435912	4.6819
27	78975001	79125000	0.413381	4.38985
27	82125001	82275000	0.404189	4.24255
27	82200001	82350000	0.430611	4.53903
27	82275001	82425000	0.424562	4.60363
27	82350001	82500000	0.409018	4.17144
27	82425001	82575000	0.414017	4.07347
27	82500001	82650000	0.426634	4.2835
27	82575001	82725000	0.416507	4.478
27	94350001	94500000	0.460543	3.59895
27	94425001	94575000	0.449366	3.96445
27	119700001	119850000	0.503787	3.59595
27	153225001	153375000	0.405018	3.67561

[truncated: 4 more sheets: Table S11, Table S12, Table S13, Table S14]
